# Supplementary material for: Electrochemical oxidative decarboxylative of α-oxocarboxylic acids towards the synthesis of quinazolines and quinazolinones
Source: Royal Society of Chemistry journal article supplement (doi:10.1039/d4ra01318b), 2024-01-01
Supplement: d4ra01318b1.pdf [file d4ra01318b1.pdf]

# Supporting Information for

## Electrochemical Oxidative Decarboxylative of $\alpha$ -Oxocarboxylic Acids towards the Synthesis of Quinazolines and Quinazolinones

Jiwei Wu,<sup>a</sup> Mengru Zhang,<sup>a</sup> Jun He,<sup>a</sup> Kaixuan Li,<sup>a</sup> Longqiang Ye,<sup>\*a</sup> Jie Zhou,<sup>b</sup> Xiaolan Xu,<sup>\*c</sup>  
Zirong Li<sup>\*a</sup> and Huajian Xu<sup>\*b</sup>

<sup>a</sup> College of Chemistry and Materials Engineering, Anhui Science and Technology University, Fengyang, 233100, P. R. China

<sup>b</sup> School of Food and Biological Engineering, Hefei University of Technology, Hefei, 230009, P. R. China

<sup>c</sup> School of Medical Science, Anhui Medical University, Hefei, 230009, P. R. China

\*Email: [hjxu@hfut.edu.cn](mailto:hjxu@hfut.edu.cn); [lizir@ahstu.edu.cn](mailto:lizir@ahstu.edu.cn); [xlxu@ustc.edu.cn](mailto:xlxu@ustc.edu.cn); [yelq@ahstu.edu.cn](mailto:yelq@ahstu.edu.cn)

|                                                               |            |
|---------------------------------------------------------------|------------|
| <b>General information.....</b>                               | <b>S2</b>  |
| <b>General procedures.....</b>                                | <b>S2</b>  |
| <b>Detail descriptions for products.....</b>                  | <b>S3</b>  |
| <b>Electrochemical procedures for cyclic voltammetry.....</b> | <b>S6</b>  |
| <b>Detail descriptions for products.....</b>                  | <b>S7</b>  |
| <b>Copies of product NMR spectra.....</b>                     | <b>S20</b> |
| <b>References.....</b>                                        | <b>S67</b> |

## General information

All glassware was oven dried at 110 °C for hours and cooled down under vacuum. Unless otherwise noted, materials were obtained from commercial suppliers and used without further purification. The instrument for electrolysis is dual display potentiostat (DJS-292B) (made in China). The anodic electrode was graphite rod ( $\phi$  6 mm, hard) and cathodic electrode was nickel plate (1.5 cm  $\times$  1.5 cm  $\times$  0.1 cm). Thin layer chromatography (TLC) employed glass 0.25 mm silica gel plates. Flash chromatography columns were packed with 200-300 mesh silica gel in petroleum (bp. 60-90 °C).  $^1\text{H}$ ,  $^{13}\text{C}$  and  $^{19}\text{F}$  NMR data were recorded with Bruker Advance III (400 MHz) spectrometers with tetramethylsilane as an internal standard. All chemical shifts ( $\delta$ ) are reported in ppm and coupling constants ( $J$ ) in Hz. All chemical shifts are reported relative to tetramethylsilane and *d*-solvent peaks, respectively.

## General procedures

### General procedure for the synthesis of 3-10:

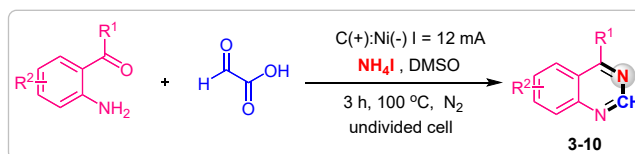

In a 25 mL three-necked bottle equipped with a magnetic stir bar, C rod ( $\phi$  6 mm) was used as anode and Ni (1.5 cm  $\times$  1.5 cm  $\times$  0.1 cm) was used as cathode. (2-aminophenyl)(phenyl)methanone (0.2 mmol),  $\text{NH}_4\text{I}$  (0.8 mmol, 116.0 mg) were added and charged with  $\text{N}_2$  for three times. The glyoxylic acid **2** (0.4 mmol, 60  $\mu\text{L}$ ) and DMSO (10.0 mL) were added sequentially to the bottle via syringes. The Electrolysis experiment was performed at 12 mA, 100 °C for 3 hours. When the reaction was finished, the reaction mixture was washed with water and extracted with ethyl acetate (10 mL  $\times$  3). The organic layers were combined, dried with  $\text{Na}_2\text{SO}_4$ , and concentrated. The pure product was obtained by flash column chromatography on silica gel.

### General procedure for the synthesis of 11-22:

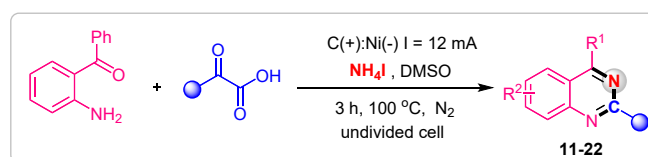

In a 25 mL three-necked bottle equipped with a magnetic stir bar, C rod ( $\phi$  6 mm) was used as

anode and Ni (1.5 cm × 1.5 cm × 0.1 cm) was used as cathode. (2-aminophenyl)(phenyl)methanone **1** (0.2 mmol, 39.4 mg),  $\alpha$ -keto acids (0.4 mmol) NH<sub>4</sub>I (0.8 mmol, 116.0 mg) were added and charged with N<sub>2</sub> for three times. The DMSO (10.0 mL) was added sequentially to the bottle via syringes. The Electrolysis experiment was performed at 12 mA, 100 °C for 3 hours. When the reaction was finished, the reaction mixture was washed with water and extracted with ethyl acetate (10 mL x 3). The organic layers were combined, dried with Na<sub>2</sub>SO<sub>4</sub>, and concentrated. The pure product was obtained by flash column chromatography on silica gel.

**General procedure for the synthesis of 23-38:**

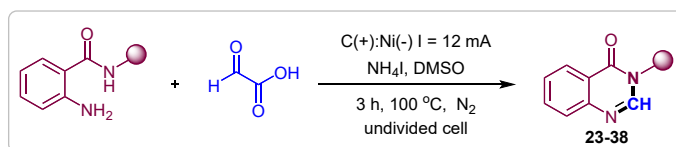

In a 25 mL three-necked bottle equipped with a magnetic stir bar, C rod ( $\phi$  6 mm) was used as anode and Ni (1.5 cm × 1.5 cm × 0.1 cm) was used as cathode. 2-Amino-N-substitutedbenzamide (0.2 mmol), NH<sub>4</sub>I (0.8 mmol, 116.0 mg) were added and charged with N<sub>2</sub> for three times. The glyoxylic acid **2** (0.4 mmol, 60  $\mu$ L) and DMSO (10.0 mL) were added sequentially to the bottle via syringes. The Electrolysis experiment was performed at 12 mA, 100 °C for 3 hours. When the reaction was finished, the reaction mixture was washed with water and extracted with ethyl acetate (10 mL x 3). The organic layers were combined, dried with Na<sub>2</sub>SO<sub>4</sub>, and concentrated. The pure product was obtained by flash column chromatography on silica gel.

**General procedure for the synthesis of 39-46:**

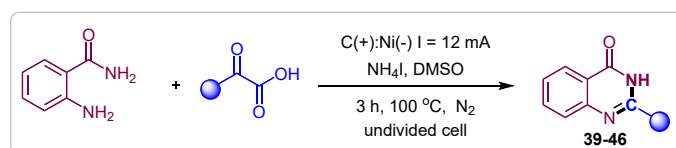

In a 25 mL three-necked bottle equipped with a magnetic stir bar, C rod ( $\phi$  6 mm) was used as anode and Ni (1.5 cm × 1.5 cm × 0.1 cm) was used as cathode. 2-Aminobenzamide (0.2 mmol, 27.2 mg),  $\alpha$ -keto acids (0.4 mmol) NH<sub>4</sub>I (0.8 mmol, 116.0 mg) were added and charged with N<sub>2</sub> for three times. The DMSO (10.0 mL) was added sequentially to the bottle via syringes. The Electrolysis experiment was performed at 12 mA, 100 °C for 3 hours. When the reaction was finished, the reaction mixture was washed with water and extracted with ethyl acetate (10 mL x 3). The organic layers were combined, dried with Na<sub>2</sub>SO<sub>4</sub>, and concentrated. The pure product was

obtained by flash column chromatography on silica gel.

### General procedures for gram-scale synthesis

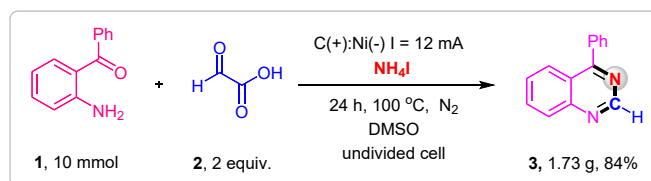

In a 250 mL three-necked bottle equipped with a magnetic stir bar, C rod ( $\phi$  6 mm) was used as anode and Ni (1.5 cm  $\times$  1.5 cm  $\times$  0.1 cm) was used as cathode. (2-Aminophenyl)(phenyl)methanone **1** (10 mmol, 1.97 g),  $\text{NH}_4\text{I}$  (40.0 mmol, 5.80 g) were added and charged with  $\text{N}_2$  for three times. The glyoxylic acid **2** (20.0 mmol, 3.0 mL) and DMSO (100.0 mL) were added sequentially to the bottle via syringes. The Electrolysis experiment was performed at 12 mA for 24 h. When the reaction was finished, the reaction mixture was washed with water and extracted with ethyl acetate (100 mL  $\times$  3). The organic layers were combined, dried with  $\text{Na}_2\text{SO}_4$ , and concentrated. The pure product was obtained by flash column chromatography on silica gel.

**Table S1. Optimization of electrolyte<sup>a</sup>**

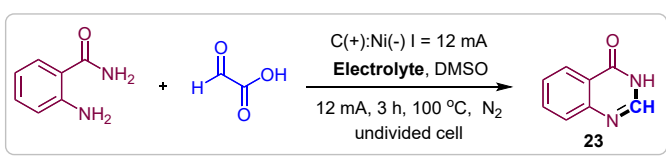

| Entry | Electrolyte                   | Yield of <b>23</b> (%) <sup>b</sup> |
|-------|-------------------------------|-------------------------------------|
| 1     | $\text{NH}_4\text{I}$         | 74                                  |
| 2     | KI                            | 57                                  |
| 3     | ${}^n\text{Bu}_4\text{NBF}_4$ | 39                                  |
| 4     | ${}^n\text{Bu}_4\text{NPF}_6$ | 36                                  |
| 5     | --                            | 0                                   |

<sup>a</sup>Reaction conditions: C anode, Ni cathode, constant current = 12 mA, **2-aminobenzamide** (0.2 mmol), **2-oxoacetic acid** (0.4 mmol), electrolyte (0.8 mmol), in 10.0 mL DMSO at 100 °C under  $\text{N}_2$  for 3 h. <sup>b</sup>Yields shown are of isolated products.

### GC-MS result for 49, 50, 51 and 52

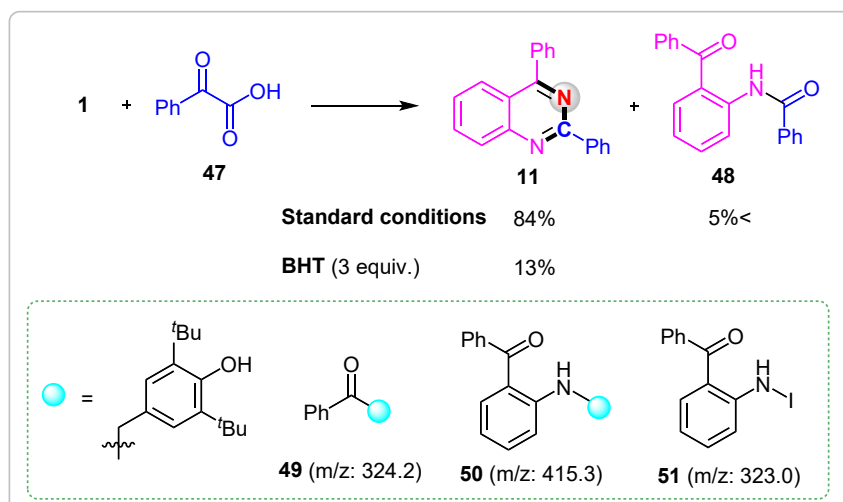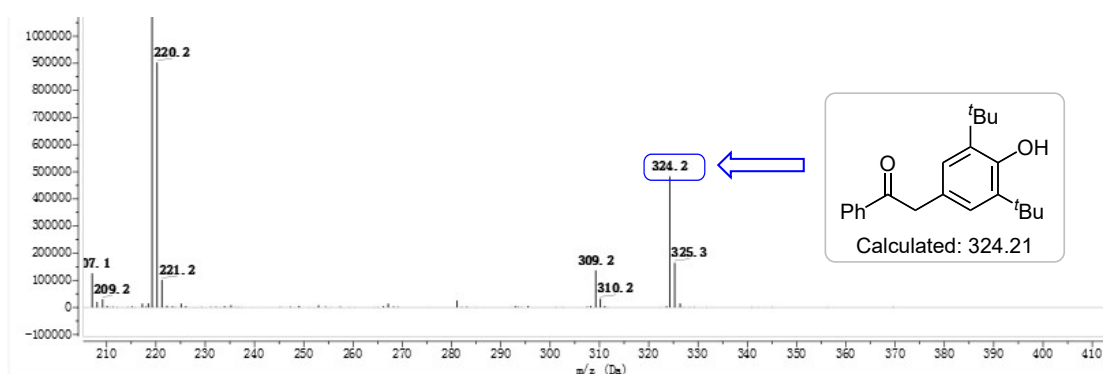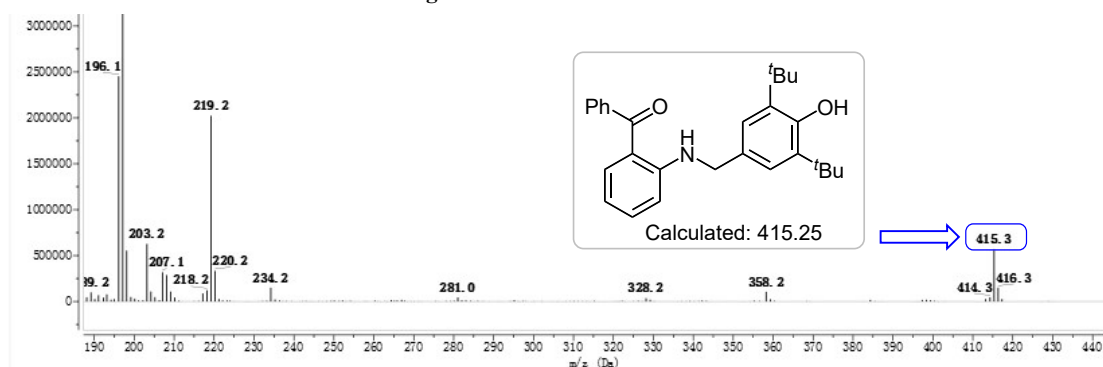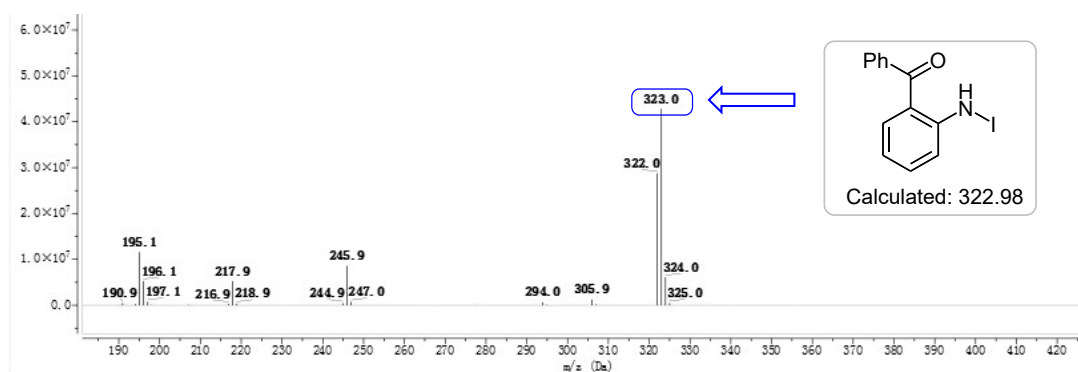

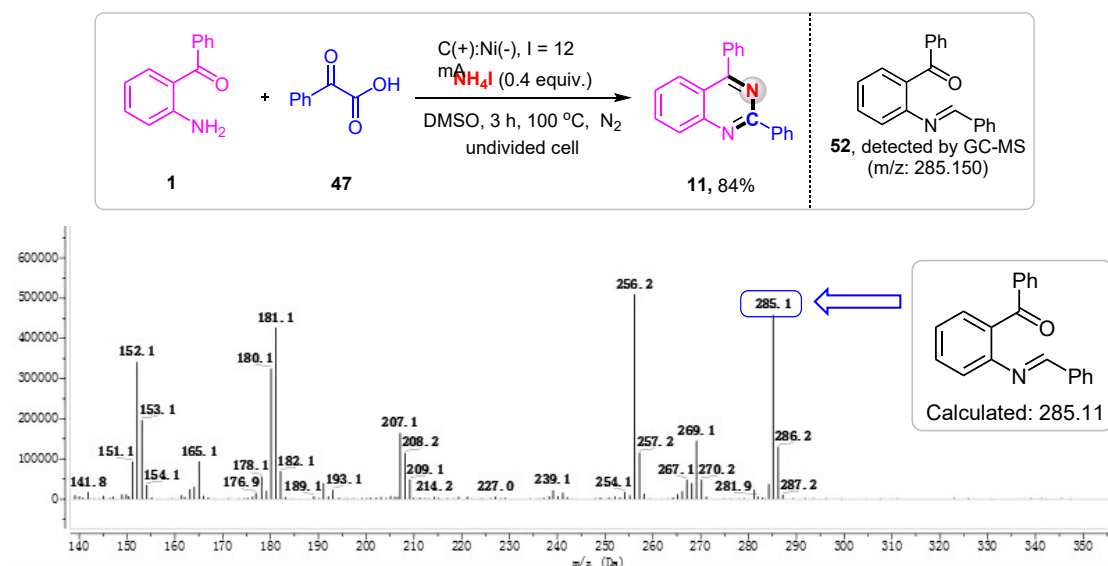

Figure S4. GC-MS result for 52

## Electrochemical procedures for cyclic voltammetry

Cyclic voltammetry was performed in a three-electrode cell connected to a schlenk line under nitrogen at 35 °C. The working electrode was a steady glassy carbon disk electrode, the counter electrode was a platinum wire. The reference was an Ag/AgCl electrode submerged in saturated aqueous KCl solution. 10.0 mL of DMSO and 0.1 mmol of <sup>n</sup>Bu<sub>4</sub>NBF<sub>4</sub> were added to the electrochemical cell in all experiments. The scan rate was 0.05 V/s, from 0 V to 2.5 V

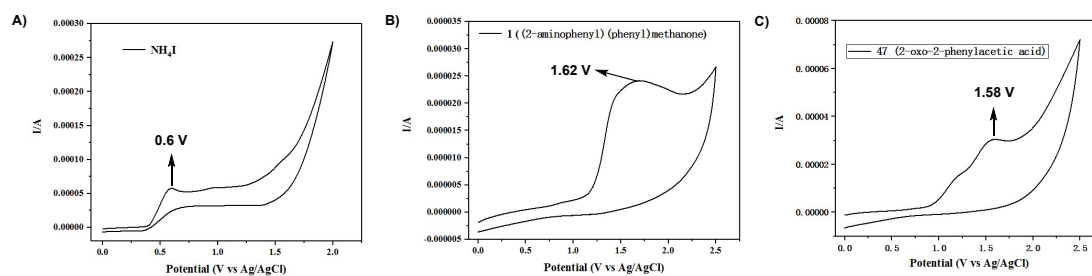

Figure S5. A) Cyclic voltammetry of NH<sub>4</sub>I (0.1 mmol) in DMSO (10 mL) with <sup>n</sup>Bu<sub>4</sub>NBF<sub>4</sub> (0.1 mmol) under nitrogen at a scan rate of  $\nu = 0.05$  V/s, from 0 V to 2.0 V. B) Cyclic voltammetry of 1 (0.1 mmol) in DMSO (10 mL) with <sup>n</sup>Bu<sub>4</sub>NBF<sub>4</sub> (0.1 mmol) under nitrogen at a scan rate of  $\nu = 0.05$  V/s, from 0 V to 2.5 V. C) Cyclic voltammetry of 47 (0.1 mmol) in DMSO (10 mL) with <sup>n</sup>Bu<sub>4</sub>NBF<sub>4</sub> (0.1 mmol) under nitrogen at a scan rate of  $\nu = 0.05$  V/s, from 0 V to 2.5 V.

## Detail descriptions for products

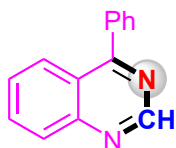

**4-phenylquinazoline 3**<sup>[1]</sup>: 38.8 mg, 82% yield, a white solid, mp. 97 - 98 °C. <sup>1</sup>H NMR (400 MHz, CDCl<sub>3</sub>) δ 9.39 (s, 1H), 8.13 (t, *J* = 7.9 Hz, 2H), 7.92 (ddd, *J* = 8.3, 6.9, 1.3 Hz, 1H), 7.82 – 7.74 (m, 2H), 7.65 – 7.54 (m, 4H). <sup>13</sup>C NMR (101 MHz, CDCl<sub>3</sub>) δ 168.43, 154.71, 151.13, 137.12, 133.73, 130.09, 129.97, 128.94, 128.67, 127.76, 127.13, 123.19.

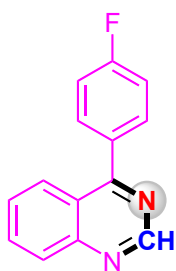

**4-(4-Fluorophenyl)quinazoline 4**<sup>[1]</sup>: 35.9 mg, 80% yield, a light yellow solid, mp. 91 - 93 °C. <sup>1</sup>H NMR (400 MHz, CDCl<sub>3</sub>) δ 9.36 (s, 1H), 8.11 (t, *J* = 8.3 Hz, 2H), 7.93 (t, *J* = 8.0 Hz, 1H), 7.80 (dd, *J* = 8.6, 5.4 Hz, 2H), 7.63 (t, *J* = 7.7 Hz, 1H), 7.27 (t, *J* = 8.6 Hz, 2H). <sup>13</sup>C NMR (101 MHz, CDCl<sub>3</sub>) δ 167.23, 165.24, 162.75, 154.60, 151.15, 133.82, 133.21 (d, *J*<sub>C-F</sub> = 3.3 Hz), 132.03 (d, *J*<sub>C-F</sub> = 8.5 Hz), 129.03, 127.92, 126.78, 123.04, 115.84 (d, *J*<sub>C-F</sub> = 21.8 Hz). <sup>19</sup>F NMR (377 MHz, CDCl<sub>3</sub>) δ -110.29.

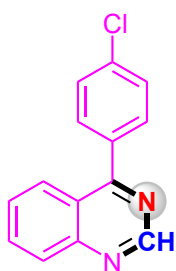

**4-(4-Chlorophenyl)quinazoline 5**<sup>[1]</sup>: 39.9 mg, 83% yield, a light yellow solid, mp. 116 - 118 °C. <sup>1</sup>H NMR (400 MHz, CDCl<sub>3</sub>) δ 9.38 (s, 1H), 8.11 (dd, *J* = 16.5, 8.4 Hz, 2H), 7.94 (t, *J* = 8.4 Hz, 1H), 7.75 (d, *J* = 8.6 Hz, 2H), 7.64 (t, *J* = 8.3 Hz, 1H), 7.57 (d, *J* = 8.6 Hz, 2H). <sup>13</sup>C NMR (101 MHz, CDCl<sub>3</sub>) δ 167.14, 154.65, 151.19, 136.49, 135.53, 133.90, 131.33, 129.10, 128.99, 128.00, 126.67, 122.99.

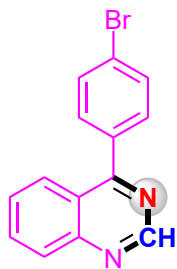

**4-(4-Bromophenyl)quinazoline 6<sup>[1]</sup>**: 23.2 mg, 41% yield, a white solid, mp. 152 - 153 °C. <sup>1</sup>H NMR (400 MHz, CDCl<sub>3</sub>) δ 9.38 (s, 1H), 8.11 (dd, *J* = 18.4, 8.4 Hz, 2H), 7.94 (t, *J* = 8.3 Hz, 1H), 7.73 (d, *J* = 8.5 Hz, 2H), 7.70 – 7.59 (m, 3H). <sup>13</sup>C NMR (101 MHz, CDCl<sub>3</sub>) δ 167.15, 154.62, 151.14, 135.95, 133.88, 131.91, 131.52, 129.06, 127.98, 126.62, 124.81, 122.89.

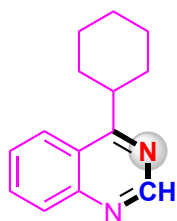

**4-Cyclohexylquinazoline 7<sup>[1]</sup>**: 26.7 mg, 63% yield, oily liquid. <sup>1</sup>H NMR (400 MHz, CDCl<sub>3</sub>) δ 9.25 (s, 1H), 8.19 (d, *J* = 8.4 Hz, 1H), 8.04 (d, *J* = 8.4 Hz, 1H), 7.91 – 7.80 (m, 1H), 7.64 (t, *J* = 7.1 Hz, 1H), 3.56 (tt, *J* = 11.7, 3.2 Hz, 1H), 1.98 – 1.80 (m, 7H), 1.59 – 1.47 (m, 2H), 1.44 – 1.36 (m, 1H). <sup>13</sup>C NMR (101 MHz, CDCl<sub>3</sub>) δ 175.13, 154.76, 150.08, 133.33, 129.34, 127.37, 124.20, 123.27, 41.30, 32.05, 26.54, 26.03.

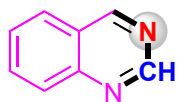

**Quinazoline 8<sup>[1]</sup>**: 9.6 mg, 37% yield, a light yellow solid, mp. 47 - 49 °C. <sup>1</sup>H NMR (400 MHz, CDCl<sub>3</sub>) δ 9.41 (s, 1H), 9.35 (s, 1H), 8.06 (d, *J* = 8.8 Hz, 1H), 7.93 (dd, *J* = 7.7, 6.4 Hz, 2H), 7.68 (t, *J* = 7.5 Hz, 1H). <sup>13</sup>C NMR (101 MHz, CDCl<sub>3</sub>) δ 160.22, 155.24, 149.98, 134.17, 128.37, 127.93, 127.18, 125.06.

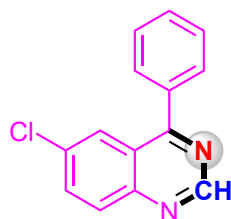

**6-Chloro-4-phenylquinazoline 9<sup>[1]</sup>**: 34.1 mg, 71% yield, a light yellow solid, mp. 134 - 135 °C. <sup>1</sup>H NMR (400 MHz, CDCl<sub>3</sub>) δ 9.38 (s, 1H), 8.11 (d, *J* = 2.2 Hz, 1H), 8.07 (d, *J* = 9.0 Hz, 1H),



7.85 (dd,  $J = 9.0, 2.3$  Hz, 1H), 7.77 (dd,  $J = 6.7, 2.8$  Hz, 2H), 7.63 – 7.58 (m, 3H).  $^{13}\text{C}$  NMR (101 MHz,  $\text{CDCl}_3$ )  $\delta$  167.67, 154.85, 149.63, 136.55, 134.73, 133.54, 130.71, 130.40, 129.86, 128.89, 125.84, 123.72.

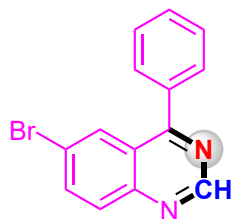

**6-Bromo-4-phenylquinazoline 10**<sup>[1]</sup>: 29.4 mg, 52% yield, a light yellow solid, mp. 145 - 147 °C.  $^1\text{H}$  NMR (400 MHz,  $\text{CDCl}_3$ )  $\delta$  9.39 (s, 1H), 8.27 (s, 1H), 8.03 – 7.94 (m, 2H), 7.77 (dd,  $J = 6.7, 2.9$  Hz, 2H), 7.65 – 7.57 (m, 3H).  $^{13}\text{C}$  NMR (101 MHz,  $\text{CDCl}_3$ )  $\delta$  167.48, 154.85, 149.76, 137.22, 136.47, 130.71, 130.38, 129.84, 129.12, 128.85, 124.11, 121.57.

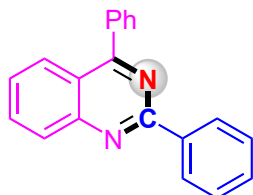

**2,4-Diphenylquinazoline 11**<sup>[2]</sup>: 47.4 mg, 84% yield, a light yellow solid, mp. 114 - 115 °C.  $^1\text{H}$  NMR (400 MHz,  $\text{CDCl}_3$ )  $\delta$  8.69 (d,  $J = 6.3$  Hz, 2H), 8.15 (dd,  $J = 12.1, 8.5$  Hz, 2H), 7.93 – 7.83 (m, 3H), 7.66 – 7.58 (m, 3H), 7.58 – 7.46 (m, 4H).  $^{13}\text{C}$  NMR (101 MHz,  $\text{CDCl}_3$ )  $\delta$  168.34, 160.26, 151.99, 138.20, 137.67, 133.56, 130.51, 130.19, 129.93, 129.16, 128.67, 128.54, 127.03, 121.70.

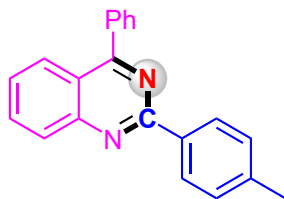

**4-Phenyl-2-(p-tolyl)quinazoline 12**<sup>[2]</sup>: 42.1 mg, 71% yield, a white solid, mp. 162 - 163 °C.  $^1\text{H}$  NMR (400 MHz,  $\text{CDCl}_3$ )  $\delta$  8.59 (d,  $J = 8.2$  Hz, 2H), 8.17 – 8.08 (m, 2H), 7.92 – 7.83 (m, 3H), 7.64 – 7.57 (m, 3H), 7.53 (t,  $J = 7.6$  Hz, 1H), 7.33 (d,  $J = 8.1$  Hz, 2H), 2.45 (s, 3H).  $^{13}\text{C}$  NMR (101 MHz,  $\text{CDCl}_3$ )  $\delta$  168.28, 160.34, 151.99, 140.78, 137.75, 135.46, 133.53, 130.23, 129.92, 129.34, 129.07, 128.65, 128.56, 127.05, 126.82, 121.63, 21.59.

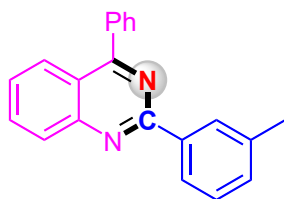

**4-Phenyl-2-(*m*-tolyl)quinazoline 13**<sup>[2]</sup>: 53.3 mg, 90% yield, a yellow solid, mp. 89 – 91 °C. <sup>1</sup>H NMR (400 MHz, CDCl<sub>3</sub>) δ 8.49 (d, *J* = 8.1 Hz, 2H), 8.14 (dd, *J* = 13.5, 8.4 Hz, 2H), 7.96 – 7.84 (m, 3H), 7.65 – 7.58 (m, 3H), 7.55 (t, *J* = 7.1 Hz, 1H), 7.42 (t, *J* = 7.8 Hz, 1H), 7.32 (d, *J* = 7.7 Hz, 1H), 2.49 (s, 3H). <sup>13</sup>C NMR (101 MHz, CDCl<sub>3</sub>) δ 168.35, 160.45, 152.00, 138.20, 137.71, 133.58, 131.38, 130.24, 129.96, 129.18, 128.58, 128.51, 127.07, 126.99, 125.93, 121.71, 21.61.

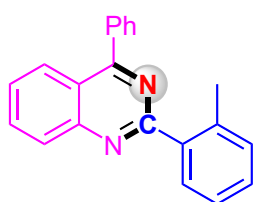

**4-Phenyl-2-(*o*-tolyl)quinazoline 14**<sup>[2]</sup>: 31.4 mg, 53% yield, a white solid, mp. 71 – 72 °C. <sup>1</sup>H NMR (400 MHz, CDCl<sub>3</sub>) δ 8.16 (d, *J* = 8.4 Hz, 2H), 8.01 – 7.95 (m, 1H), 7.92 – 7.79 (m, 3H), 7.65 – 7.50 (m, 4H), 7.38 – 7.28 (m, 3H), 2.67 (s, 3H). <sup>13</sup>C NMR (101 MHz, CDCl<sub>3</sub>) δ 168.08, 163.43, 151.70, 138.86, 137.51, 137.43, 133.67, 131.31, 130.77, 130.19, 129.97, 129.29, 129.14, 128.62, 127.36, 127.03, 126.04, 121.04, 21.34.

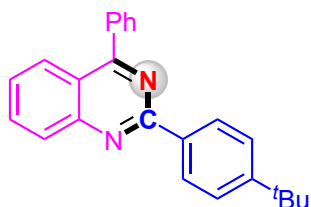

**2-(4-(*tert*-Butyl)phenyl)-4-phenylquinazoline 15**<sup>[2]</sup>: 42.0 mg, 62% yield, a yellow solid, mp. 103 – 105 °C. <sup>1</sup>H NMR (400 MHz, CDCl<sub>3</sub>) δ 8.60 (d, *J* = 8.5 Hz, 2H), 8.12 (dd, *J* = 14.5, 8.4 Hz, 2H), 7.89 – 7.84 (m, 3H), 7.63 – 7.49 (m, 6H), 1.38 (s, 9H). <sup>13</sup>C NMR (101 MHz, CDCl<sub>3</sub>) δ 168.23, 160.41, 153.82, 152.06, 137.79, 135.54, 133.49, 130.24, 129.90, 129.15, 128.55, 128.49, 127.04, 126.81, 125.56, 121.61, 34.90, 31.34.

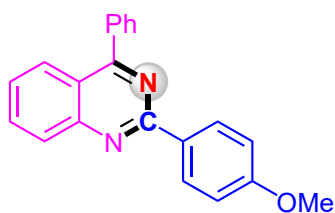

**2-(4-Methoxyphenyl)-4-phenylquinazoline 16**<sup>[2]</sup>: 28.7 mg, 46% yield, a white solid, mp. 159 –

160 °C. <sup>1</sup>H NMR (400 MHz, CDCl<sub>3</sub>) δ 8.66 (d, *J* = 8.9 Hz, 2H), 8.11 (t, *J* = 8.3 Hz, 2H), 7.88 (dd, *J* = 6.5, 3.2 Hz, 3H), 7.62 – 7.58 (m, 3H), 7.51 (t, *J* = 7.6 Hz, 1H), 7.04 (d, *J* = 8.9 Hz, 2H), 3.90 (s, 3H). <sup>13</sup>C NMR (101 MHz, CDCl<sub>3</sub>) δ 168.25, 161.78, 160.05, 152.01, 137.77, 133.54, 130.87, 130.35, 130.20, 129.91, 128.91, 128.55, 127.06, 126.59, 121.42, 113.88, 55.42.

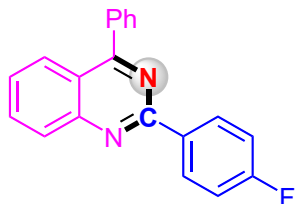

**2-(4-Fluorophenyl)-4-phenylquinazoline 17**<sup>[2]</sup>: 43.8 mg, 73% yield, a light yellow solid, mp. 155 - 156 °C. <sup>1</sup>H NMR (400 MHz, CDCl<sub>3</sub>) δ 8.70 (dd, *J* = 8.8, 5.7 Hz, 2H), 8.13 (dd, *J* = 8.4, 4.0 Hz, 2H), 7.87 (dd, *J* = 6.4, 2.6 Hz, 3H), 7.63 – 7.58 (m, 3H), 7.55 (t, *J* = 7.7 Hz, 1H), 7.20 (t, *J* = 8.7 Hz, 2H). <sup>13</sup>C NMR (101 MHz, CDCl<sub>3</sub>) δ 168.44, 165.91, 163.43, 159.32, 151.95, 137.59, 134.38 (d, *J*<sub>C-F</sub> = 2.9 Hz), 133.71, 130.78 (d, *J*<sub>C-F</sub> = 8.7 Hz), 130.19, 130.04, 129.07, 128.60, 127.09 (d, *J*<sub>C-F</sub> = 1.0 Hz), 121.60, 115.48 (d, *J*<sub>C-F</sub> = 21.6 Hz). <sup>19</sup>F NMR (376 MHz, CDCl<sub>3</sub>) δ -110.77.

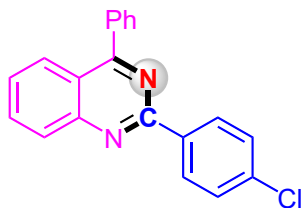

**2-(4-Chlorophenyl)-4-phenylquinazoline 18**<sup>[2]</sup>: 35.4 mg, 54% yield, a white solid, mp. 190 - 191 °C. <sup>1</sup>H NMR (400 MHz, CDCl<sub>3</sub>) δ 8.64 (d, *J* = 8.6 Hz, 2H), 8.12 (dd, *J* = 8.4, 3.6 Hz, 2H), 7.93 – 7.83 (m, 3H), 7.64 – 7.52 (m, 4H), 7.48 (d, *J* = 8.6 Hz, 2H). <sup>13</sup>C NMR (101 MHz, CDCl<sub>3</sub>) δ 168.46, 159.22, 151.91, 137.53, 136.73, 133.75, 130.20, 130.07, 130.03, 129.13, 128.75, 128.62, 127.26, 127.10, 121.73.

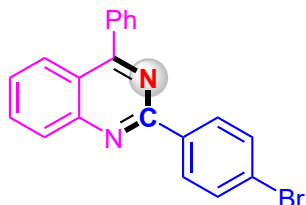

**2-(4-Bromophenyl)-4-phenylquinazoline 19**<sup>[2]</sup>: 54.7 mg, 76% yield, a white solid, mp. 140 - 142 °C. <sup>1</sup>H NMR (400 MHz, CDCl<sub>3</sub>) δ 8.58 (d, *J* = 8.5 Hz, 2H), 8.14 (dd, *J* = 8.4, 4.6 Hz, 2H), 7.94 – 7.84 (m, 3H), 7.66 – 7.55 (m, 6H). <sup>13</sup>C NMR (101 MHz, CDCl<sub>3</sub>) δ 168.49, 159.30, 151.89, 137.51, 137.14, 133.78, 131.72, 130.29, 130.20, 130.09, 129.13, 128.62, 127.30, 127.12, 125.34, 121.77.

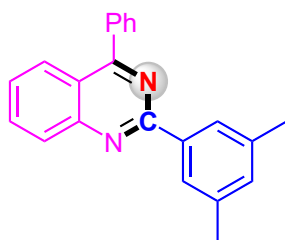

**2-(3,5-Dimethylphenyl)-4-phenylquinazoline 20**<sup>[2]</sup>: 35.4 mg, 54% yield, a light yellow solid, mp. 160 - 161 °C. <sup>1</sup>H NMR (400 MHz, CDCl<sub>3</sub>) δ 8.30 (s, 2H), 8.13 (dd, *J* = 16.3, 8.3 Hz, 2H), 7.90 – 7.86 (m, 3H), 7.65 – 7.58 (m, 3H), 7.53 (t, *J* = 7.6 Hz, 1H), 7.14 (s, 1H), 2.44 (s, 6H). <sup>13</sup>C NMR (101 MHz, CDCl<sub>3</sub>) δ 168.34, 160.60, 151.97, 138.11, 137.72, 133.56, 132.38, 130.25, 129.95, 129.11, 128.59, 127.07, 126.93, 126.46, 121.74, 21.50.

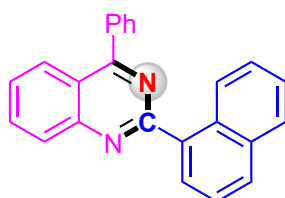

**2-(Naphthalen-1-yl)-4-phenylquinazoline 21**<sup>[3]</sup>: 48.5 mg, 73% yield, a yellow solid, mp. 172 - 173 °C. <sup>1</sup>H NMR (400 MHz, CDCl<sub>3</sub>) δ 8.79 (d, *J* = 8.3 Hz, 1H), 8.26 – 8.17 (m, 3H), 8.00 – 7.85 (m, 5H), 7.66 – 7.48 (m, 7H). <sup>13</sup>C NMR (101 MHz, CDCl<sub>3</sub>) δ 168.53, 162.82, 151.77, 137.48, 136.58, 134.26, 133.82, 131.40, 130.29, 130.20, 130.01, 129.73, 129.22, 128.66, 128.50, 127.53, 127.11, 126.78, 126.13, 125.85, 125.37, 121.32.

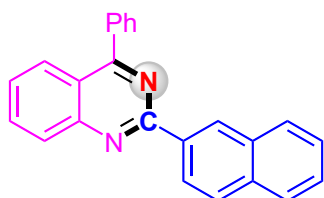

**2-(Naphthalen-2-yl)-4-phenylquinazoline 22**<sup>[2]</sup>: 53.2 mg, 80% yield, a white solid, mp. 173 - 174 °C. <sup>1</sup>H NMR (400 MHz, CDCl<sub>3</sub>) δ 9.24 (s, 1H), 8.81 (dd, *J* = 8.6, 1.6 Hz, 1H), 8.20 (d, *J* = 8.4 Hz, 1H), 8.14 (d, *J* = 8.3 Hz, 1H), 8.06 – 8.01 (m, 1H), 7.98 (d, *J* = 8.7 Hz, 1H), 7.95 – 7.86 (m, 4H), 7.67 – 7.59 (m, 3H), 7.58 – 7.49 (m, 3H). <sup>13</sup>C NMR (101 MHz, CDCl<sub>3</sub>) δ 168.43, 160.24, 152.07, 137.73, 135.61, 134.72, 133.64, 133.45, 130.26, 130.00, 129.32, 129.20, 129.02, 128.62, 128.18, 127.75, 127.11, 127.08, 127.00, 126.15, 125.62, 121.79.

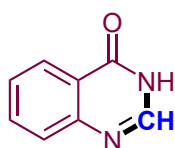

**Quinazolin-4(3H)-one 23**<sup>[4]</sup>: 21.6 mg, 74% yield, a white solid, mp. 215 - 217 °C. <sup>1</sup>H NMR (400 MHz, DMSO-*d*<sub>6</sub>) δ 12.29 (s, 1H), 8.17 – 8.07 (m, 2H), 7.86 – 7.80 (m, 1H), 7.68 (d, *J* = 7.9 Hz, 1H), 7.56 – 7.51 (m, 1H). <sup>13</sup>C NMR (101 MHz, DMSO-*d*<sub>6</sub>) δ 161.21, 149.21, 145.89, 134.81, 127.69, 127.23, 126.30, 123.06.

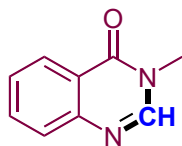

**3-Methylquinazolin-4(3H)-one 24**<sup>[4]</sup>: 30.7 mg, 96% yield, a white solid, mp. 104 - 105 °C. <sup>1</sup>H NMR (400 MHz, CDCl<sub>3</sub>) δ 8.29 (d, *J* = 8.0 Hz, 1H), 8.04 (s, 1H), 7.74 (t, *J* = 7.6 Hz, 1H), 7.68 (d, *J* = 8.0 Hz, 1H), 7.49 (t, *J* = 7.5 Hz, 1H), 3.58 (s, 3H). <sup>13</sup>C NMR (101 MHz, CDCl<sub>3</sub>) δ 161.59, 148.24, 146.80, 134.20, 127.45, 127.33, 126.53, 121.94, 34.14.

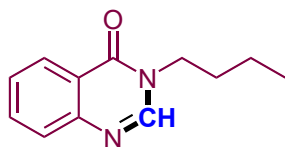

**3-Butylquinazolin-4(3H)-one 25**<sup>[4]</sup>: 36.4 mg, 90% yield, a white solid, mp. 61 - 62 °C. <sup>1</sup>H NMR (400 MHz, CDCl<sub>3</sub>) δ 8.31 (dd, *J* = 8.0, 1.3 Hz, 1H), 8.04 (s, 1H), 7.78 – 7.73 (m, 1H), 7.71 (d, *J* = 7.2 Hz, 1H), 7.53 – 7.48 (m, 1H), 4.04 – 3.97 (m, 2H), 1.82 – 1.72 (m, 2H), 1.41 (dq, *J* = 14.8, 7.4 Hz, 2H), 0.97 (t, *J* = 7.3 Hz, 3H). <sup>13</sup>C NMR (101 MHz, CDCl<sub>3</sub>) δ 161.07, 148.02, 146.64, 134.19, 127.36, 127.28, 126.72, 122.17, 46.88, 31.44, 19.93, 13.70.

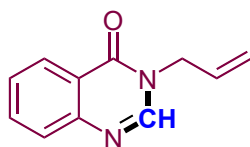

**3-Allylquinazolin-4(3H)-one 26**<sup>[4]</sup>: 25.6 mg, 76% yield, a white solid, mp. 56 - 58 °C. <sup>1</sup>H NMR (400 MHz, CDCl<sub>3</sub>) δ 8.31 (d, *J* = 8.0 Hz, 1H), 8.01 (s, 1H), 7.79 – 7.66 (m, 2H), 7.50 (t, *J* = 7.5 Hz, 1H), 6.03 – 5.94 (m, 1H), 5.28 (t, *J* = 14.9 Hz, 2H), 4.63 (d, *J* = 5.7 Hz, 2H). <sup>13</sup>C NMR (101 MHz, CDCl<sub>3</sub>) δ 160.85, 148.07, 146.24, 134.33, 131.84, 127.50, 127.38, 126.81, 122.09, 118.90, 48.37.

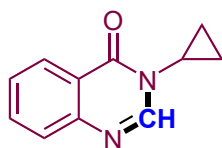

**3-Cyclopropylquinazolin-4(3H)-one 27**<sup>[5]</sup>: 30.2 mg, 81% yield, a white solid, mp. 95 - 97 °C. <sup>1</sup>H

NMR (400 MHz, CDCl<sub>3</sub>)  $\delta$  8.29 (d,  $J$  = 8.0 Hz, 1H), 8.10 (s, 1H), 7.73 (t,  $J$  = 7.6 Hz, 1H), 7.67 (d,  $J$  = 8.1 Hz, 1H), 7.48 (t,  $J$  = 7.5 Hz, 1H), 3.27 – 3.20 (m, 1H), 1.20 (q,  $J$  = 6.8 Hz, 2H), 0.92 (dd,  $J$  = 6.1, 4.3 Hz, 2H). <sup>13</sup>C NMR (101 MHz, CDCl<sub>3</sub>)  $\delta$  162.33, 147.54, 146.84, 134.28, 127.34, 126.59, 121.80, 29.35, 6.54.

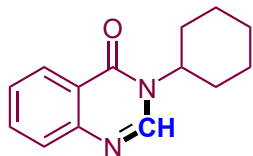

**3-Cyclohexylquinazolin-4(3H)-one 28**<sup>[4]</sup>: 37.9 mg, 83% yield, a white solid, mp. 118 - 119 °C. <sup>1</sup>H NMR (400 MHz, CDCl<sub>3</sub>)  $\delta$  8.30 (d,  $J$  = 8.7 Hz, 1H), 8.11 (s, 1H), 7.73 (t,  $J$  = 7.5 Hz, 1H), 7.68 (d,  $J$  = 7.5 Hz, 1H), 7.48 (t,  $J$  = 7.4 Hz, 1H), 4.84 – 4.77 (m, 1H), 2.0 – 1.91 (m, 4H), 1.77 (d,  $J$  = 13.2 Hz, 1H), 1.68 – 1.58 (m, 2H), 1.55 – 1.46 (m, 2H), 1.32 – 1.17 (m, 1H). <sup>13</sup>C NMR (101 MHz, CDCl<sub>3</sub>)  $\delta$  160.71, 147.50, 143.93, 134.13, 127.25, 127.12, 126.97, 121.93, 53.34, 32.62, 25.91, 25.29.

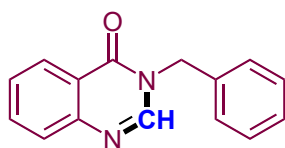

**3-Benzylquinazolin-4(3H)-one 29**<sup>[4]</sup>: 29.3 mg, 62% yield, a white solid, mp. 115 - 117 °C. <sup>1</sup>H NMR (400 MHz, CDCl<sub>3</sub>)  $\delta$  8.32 (dd,  $J$  = 8.0, 1.2 Hz, 1H), 8.11 (s, 1H), 7.78 – 7.72 (m, 1H), 7.70 (d,  $J$  = 7.3 Hz, 1H), 7.50 (t,  $J$  = 8.1 Hz, 1H), 7.35 – 7.30 (m, 5H), 5.19 (s, 2H). <sup>13</sup>C NMR (101 MHz, CDCl<sub>3</sub>)  $\delta$  161.09, 148.02, 146.39, 135.72, 134.37, 129.06, 128.34, 128.02, 127.53, 127.43, 126.90, 122.20, 49.65.

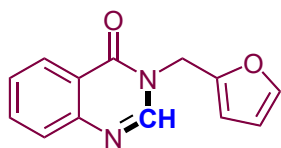

**3-(Furan-2-ylmethyl)quinazolin-4(3H)-one 30**<sup>[4]</sup>: 43.4 mg, 96% yield, a white solid, mp. 117 - 119 °C. <sup>1</sup>H NMR (400 MHz, CDCl<sub>3</sub>)  $\delta$  8.29 (d,  $J$  = 8.0 Hz, 1H), 8.16 (s, 1H), 7.76 – 7.65 (m, 2H), 7.48 (t,  $J$  = 7.4 Hz, 1H), 7.36 (s, 1H), 6.45 (d,  $J$  = 3.0 Hz, 1H), 6.33 (s, 1H), 5.17 (s, 2H). <sup>13</sup>C NMR (101 MHz, CDCl<sub>3</sub>)  $\delta$  160.61, 148.29, 147.85, 145.96, 143.10, 134.28, 127.42, 127.29, 126.71, 122.00, 110.71, 109.90, 42.03.

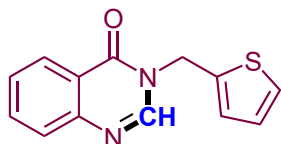

**3-(Thiophen-2-ylmethyl)quinazolin-4(3H)-one 31**<sup>[5]</sup>: 41.2 mg, 85% yield, a white solid, mp. 126 - 127 °C. <sup>1</sup>H NMR (400 MHz, CDCl<sub>3</sub>) δ 8.32 (dd, *J* = 8.0, 1.0 Hz, 1H), 8.14 (s, 1H), 7.74 (t, *J* = 8.3 Hz, 1H), 7.68 (d, *J* = 7.5 Hz, 1H), 7.49 (t, *J* = 8.1 Hz, 1H), 7.26 (dd, *J* = 5.1, 1.1 Hz, 1H), 7.14 (d, *J* = 3.1 Hz, 1H), 6.96 (dd, *J* = 5.1, 3.5 Hz, 1H), 5.33 (s, 2H). <sup>13</sup>C NMR (101 MHz, CDCl<sub>3</sub>) δ 160.78, 147.98, 145.82, 137.50, 134.43, 127.87, 127.56, 127.48, 127.13, 126.86, 126.72, 122.08, 44.33.

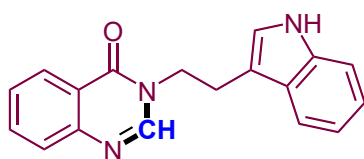

**3-(2-(1H-Indol-3-yl)ethyl)quinazolin-4(3H)-one 32**<sup>[4]</sup>: 50.9 mg, 88% yield, a white solid, mp. 162 - 163 °C. <sup>1</sup>H NMR (400 MHz, CDCl<sub>3</sub>) δ 8.37 (dd, *J* = 8.0, 1.1 Hz, 1H), 8.33 (s, 1H), 7.77 - 7.70 (m, 1H), 7.64 (dd, *J* = 8.0, 4.7 Hz, 2H), 7.54 - 7.48 (m, 2H), 7.34 (d, *J* = 8.1 Hz, 1H), 7.20 (t, *J* = 7.0 Hz, 1H), 7.12 (t, *J* = 8.0 Hz, 1H), 6.84 (d, *J* = 2.3 Hz, 1H), 4.29 (t, *J* = 6.8 Hz, 2H), 3.26 (t, *J* = 6.7 Hz, 2H). <sup>13</sup>C NMR (101 MHz, CDCl<sub>3</sub>) δ 161.17, 148.16, 146.79, 136.50, 134.21, 127.37, 127.18, 126.85, 126.68, 122.86, 122.38, 122.13, 119.76, 118.40, 111.57, 111.25, 47.59, 24.97.

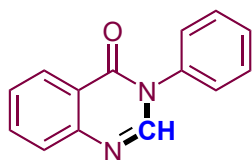

**3-Phenylquinazolin-4(3H)-one 33**<sup>[4]</sup>: 32.9 mg, 74% yield, a white solid, mp. 139 - 140 °C. <sup>1</sup>H NMR (400 MHz, CDCl<sub>3</sub>) δ 8.28 (d, *J* = 7.8 Hz, 1H), 8.07 (s, 1H), 7.71 (q, *J* = 8.0 Hz, 2H), 7.50 - 7.37 (m, 6H). <sup>13</sup>C NMR (101 MHz, CDCl<sub>3</sub>) δ 160.39, 147.54, 145.83, 137.19, 134.26, 129.32, 128.77, 127.31, 127.26, 126.81, 126.73, 122.04.

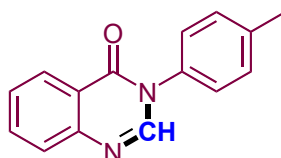

**3-(p-Tolyl)quinazolin-4(3H)-one 34**<sup>[4]</sup>: 44.5 mg, 94% yield, a white solid, mp. 148 - 149 °C. <sup>1</sup>H NMR (400 MHz, CDCl<sub>3</sub>) δ 8.37 (d, *J* = 7.9 Hz, 1H), 8.12 (s, 1H), 7.84 - 7.73 (m, 2H), 7.55 (t, *J* = 7.4 Hz, 1H), 7.36 - 7.29 (m, 4H), 2.44 (s, 3H). <sup>13</sup>C NMR (101 MHz, CDCl<sub>3</sub>) δ 160.94, 147.92,

146.32, 139.29, 134.90, 134.57, 130.28, 127.62, 127.58, 127.21, 126.76, 21.26.

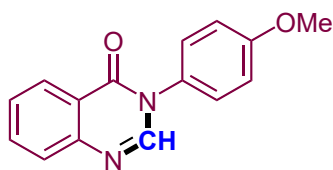

**3-(4-Methoxyphenyl)quinazolin-4(3H)-one 35**<sup>[4]</sup>: 38.8 mg, 77% yield, a white solid, mp. 210 - 211 °C. <sup>1</sup>H NMR (400 MHz, CDCl<sub>3</sub>) δ 8.34 (d, *J* = 7.9 Hz, 1H), 8.10 (s, 1H), 7.83 – 7.69 (m, 2H), 7.53 (t, *J* = 7.9 Hz, 1H), 7.32 (d, *J* = 8.6 Hz, 2H), 7.03 (d, *J* = 8.7 Hz, 2H), 3.85 (s, 3H). <sup>13</sup>C NMR (101 MHz, CDCl<sub>3</sub>) δ 160.96, 159.80, 147.81, 146.36, 134.43, 130.06, 128.06, 127.49, 127.46, 127.06, 122.27, 114.73, 55.53.

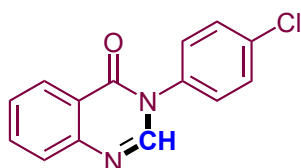

**3-(4-Chlorophenyl)quinazolin-4(3H)-one 36**<sup>[6]</sup>: 42.0 mg, 82% yield, a white solid, mp. 191 - 192 °C. <sup>1</sup>H NMR (400 MHz, CDCl<sub>3</sub>) δ 8.35 (dd, *J* = 8.0, 1.1 Hz, 1H), 8.08 (s, 1H), 7.83 – 7.75 (m, 2H), 7.54 (dd, *J* = 16.9, 8.4 Hz, 3H), 7.38 (d, *J* = 8.7 Hz, 2H). <sup>13</sup>C NMR (101 MHz, CDCl<sub>3</sub>) δ 160.57, 147.71, 145.52, 135.81, 135.11, 134.73, 129.82, 128.29, 127.80, 127.62, 127.13, 122.15.

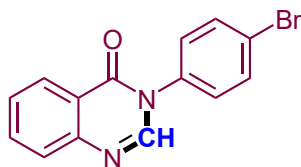

**3-(4-Bromophenyl)quinazolin-4(3H)-one 37**<sup>[4]</sup>: 33.6 mg, 56% yield, a white solid, mp. 213 - 214 °C. <sup>1</sup>H NMR (400 MHz, DMSO-*d*<sub>6</sub>) δ 8.35 (s, 1H), 8.21 (dd, *J* = 8.0, 1.3 Hz, 1H), 7.90 (t, *J* = 8.4 Hz, 1H), 7.77 (t, *J* = 9.3 Hz, 3H), 7.62 (t, *J* = 7.5 Hz, 1H), 7.54 (d, *J* = 8.6 Hz, 2H). <sup>13</sup>C NMR (101 MHz, DMSO-*d*<sub>6</sub>) δ 160.37, 148.16, 147.34, 137.32, 135.25, 132.63, 130.25, 127.98, 127.82, 126.93, 122.39, 122.31.

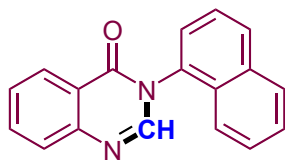

**3-(Naphthalen-1-yl)quinazolin-4(3H)-one 38**<sup>[6]</sup>: 36.5 mg, 67% yield, a white solid, mp. 97 - 99 °C. <sup>1</sup>H NMR (400 MHz, CDCl<sub>3</sub>) δ 8.42 (d, *J* = 8.0 Hz, 1H), 8.11 (s, 1H), 8.04 (d, *J* = 8.3 Hz, 1H), 7.98 (d, *J* = 7.9 Hz, 1H), 7.85 (s, 2H), 7.65 – 7.49 (m, 6H). <sup>13</sup>C NMR (101 MHz, CDCl<sub>3</sub>) δ 161.04, 148.09, 146.81, 134.70, 134.32, 134.00, 130.25, 129.67, 128.58, 127.74, 127.70, 127.65, 127.25,



126.91, 125.92, 125.43, 122.32, 121.96.

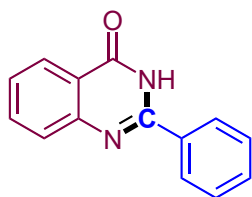

**2-Phenylquinazolin-4(3H)-one 39**<sup>[6]</sup>: 43.1 mg, 97% yield, a white solid, mp. 238 - 240 °C. <sup>1</sup>H NMR (400 MHz, DMSO-*d*<sub>6</sub>) δ 12.55 (s, 1H), 8.20 – 8.15 (m, 3H), 7.88 – 7.81 (m, 1H), 7.75 (d, *J* = 7.6 Hz, 1H), 7.63 – 7.49 (m, 4H). <sup>13</sup>C NMR (101 MHz, DMSO-*d*<sub>6</sub>) δ 162.80, 152.86, 149.14, 135.08, 133.20, 131.87, 129.09, 128.24, 127.90, 127.07, 126.33, 121.42.

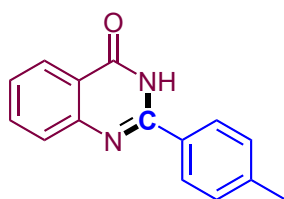

**2-(*p*-Tolyl)quinazolin-4(3H)-one 40**<sup>[6]</sup>: 43.0 mg, 91% yield, a white solid, mp. 245 - 246 °C. <sup>1</sup>H NMR (400 MHz, DMSO-*d*<sub>6</sub>) δ 12.47 (s, 1H), 8.15 (dd, *J* = 7.9, 1.2 Hz, 1H), 8.10 (d, *J* = 8.2 Hz, 2H), 7.83 (t, *J* = 6.9 Hz, 1H), 7.73 (d, *J* = 7.7 Hz, 1H), 7.51 (t, *J* = 6.9 Hz, 1H), 7.36 (d, *J* = 8.0 Hz, 2H), 2.39 (s, 3H). <sup>13</sup>C NMR (101 MHz, DMSO-*d*<sub>6</sub>) δ 162.79, 152.74, 149.24, 141.94, 135.06, 130.35, 129.67, 128.15, 127.84, 126.88, 126.32, 121.33, 21.46.

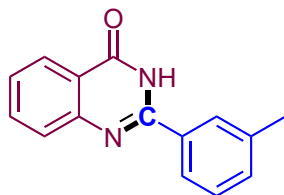

**2-(*m*-Tolyl)quinazolin-4(3H)-one 41**<sup>[6]</sup>: 29.8 mg, 63% yield, a white solid, mp. 221 - 223 °C. <sup>1</sup>H NMR (400 MHz, DMSO-*d*<sub>6</sub>) δ 12.48 (s, 1H), 8.16 (d, *J* = 7.9 Hz, 1H), 8.03 (s, 1H), 7.97 (d, *J* = 7.2 Hz, 1H), 7.84 (t, *J* = 6.9 Hz, 1H), 7.75 (d, *J* = 7.9 Hz, 1H), 7.52 (t, *J* = 7.0 Hz, 1H), 7.48 – 7.37 (m, 2H), 2.41 (s, 3H). <sup>13</sup>C NMR (101 MHz, DMSO-*d*<sub>6</sub>) δ 162.74, 152.91, 149.20, 138.40, 135.08, 133.11, 132.49, 128.99, 128.75, 127.89, 127.02, 126.32, 125.36, 121.41, 21.44.

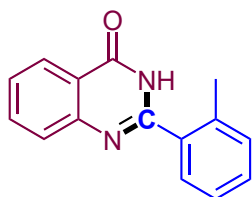

**2-(*o*-Tolyl)quinazolin-4(3H)-one 42**<sup>[6]</sup>: 35.9 mg, 76% yield, a white solid, mp. 215 - 217 °C. <sup>1</sup>H

NMR (400 MHz, DMSO- $d_6$ )  $\delta$  12.45 (s, 1H), 8.17 (d,  $J$  = 8.6 Hz, 1H), 7.84 (t,  $J$  = 7.6 Hz, 1H), 7.69 (d,  $J$  = 8.0 Hz, 1H), 7.53 (dd,  $J$  = 16.0, 7.7 Hz, 2H), 7.44 (t,  $J$  = 7.4 Hz, 1H), 7.39 – 7.33 (m, 2H), 2.39 (s, 3H).  $^{13}\text{C}$  NMR (101 MHz, DMSO- $d_6$ )  $\delta$  162.26, 154.85, 149.19, 136.57, 134.96, 134.69, 131.00, 130.37, 129.59, 127.83, 127.13, 126.25, 126.17, 121.43, 20.02.

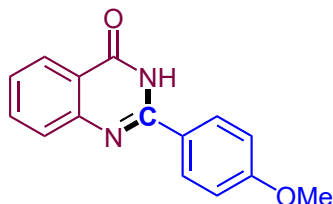

**2-(4-Methoxyphenyl)quinazolin-4(3H)-one 43**<sup>[6]</sup>: 43.4 mg, 86% yield, a white solid, mp. 249 – 251 °C.  $^1\text{H}$  NMR (400 MHz, DMSO- $d_6$ )  $\delta$  12.41 (s, 1H), 8.19 (d,  $J$  = 8.9 Hz, 2H), 8.14 (d,  $J$  = 7.9 Hz, 1H), 7.86 – 7.78 (m, 1H), 7.71 (d,  $J$  = 7.8 Hz, 1H), 7.49 (t,  $J$  = 8.0 Hz, 1H), 7.10 (d,  $J$  = 8.9 Hz, 2H), 3.85 (s, 3H).  $^{13}\text{C}$  NMR (101 MHz, DMSO- $d_6$ )  $\delta$  162.79, 162.34, 152.35, 149.40, 135.06, 129.94, 127.76, 126.64, 126.30, 125.26, 121.13, 114.48, 55.94.

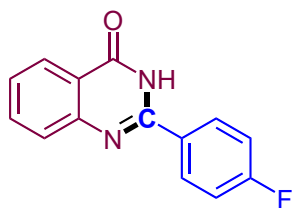

**2-(4-Fluorophenyl)quinazolin-4(3H)-one 44**<sup>[6]</sup>: 41.3 mg, 86% yield, a white solid, mp. 286 - 288 °C.  $^1\text{H}$  NMR (400 MHz, DMSO- $d_6$ )  $\delta$  12.58 (s, 1H), 8.25 (dd,  $J$  = 8.7, 5.5 Hz, 2H), 8.16 (d,  $J$  = 7.6 Hz, 1H), 7.84 (t,  $J$  = 7.6 Hz, 1H), 7.74 (d,  $J$  = 8.1 Hz, 1H), 7.53 (t,  $J$  = 7.4 Hz, 1H), 7.39 (t,  $J$  = 8.8 Hz, 2H).  $^{13}\text{C}$  NMR (101 MHz, DMSO- $d_6$ )  $\delta$  165.75, 163.01 (d,  $J_{\text{C-F}}$  = 53.1 Hz), 151.90, 149.05, 135.11, 130.84 (d,  $J_{\text{C-F}}$  = 9.0 Hz), 129.70 (d,  $J_{\text{C-F}}$  = 2.9 Hz), 127.86, 127.09, 126.33, 121.32, 116.10 (d,  $J_{\text{C-F}}$  = 21.9 Hz).

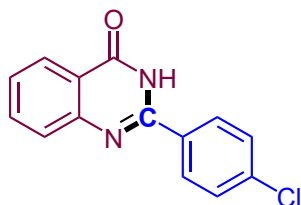

**2-(4-Chlorophenyl)quinazolin-4(3H)-one 45**<sup>[6]</sup>: 31.3 mg, 61% yield, a white solid, mp. 295 – 296 °C.  $^1\text{H}$  NMR (400 MHz, DMSO- $d_6$ )  $\delta$  12.61 (s, 1H), 8.23 – 8.13 (m, 3H), 7.89 – 7.82 (m, 1H), 7.75 (d,  $J$  = 7.8 Hz, 1H), 7.64 (d,  $J$  = 8.7 Hz, 2H), 7.58 – 7.51 (m, 1H).  $^{13}\text{C}$  NMR (101 MHz, DMSO- $d_6$ )  $\delta$  162.05, 152.11, 148.39, 134.34, 132.45, 131.13, 128.34, 127.49, 127.15, 126.32, 125.58, 120.68.

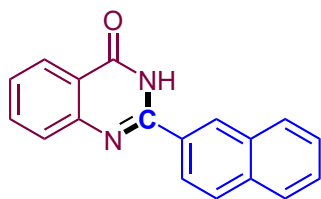

**2-(Naphthalen-2-yl)quinazolin-4(3H)-one 46**<sup>[6]</sup>: 34.3 mg, 63% yield, a light yellow solid, mp. 249 - 250 °C. <sup>1</sup>H NMR (400 MHz, DMSO-*d*<sub>6</sub>) δ 12.74 (s, 1H), 8.88 (s, 1H), 8.37 (d, *J* = 9.4 Hz, 1H), 8.25 (d, *J* = 7.7 Hz, 1H), 8.18 – 8.04 (m, 3H), 7.93 (t, *J* = 7.2 Hz, 1H), 7.87 (d, *J* = 7.9 Hz, 1H), 7.76 – 7.66 (m, 2H), 7.61 (t, *J* = 7.3 Hz, 1H). <sup>13</sup>C NMR (101 MHz, DMSO-*d*<sub>6</sub>) δ 162.72, 152.72, 149.25, 135.17, 134.61, 132.75, 130.42, 129.44, 128.67, 128.58, 128.42, 128.14, 128.04, 127.41, 127.18, 126.38, 124.97, 121.51.

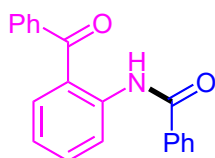

**N-(2-Benzoylphenyl)benzamide 48**<sup>[2]</sup>: 3.0 mg, < 5% yield, a white solid, mp. 81 - 82 °C. <sup>1</sup>H NMR (400 MHz, CDCl<sub>3</sub>) δ 12.01 (s, 1H), 8.94 (d, *J* = 8.1 Hz, 1H), 8.10 (dd, *J* = 8.1, 1.8 Hz, 2H), 7.74 (d, *J* = 6.8 Hz, 2H), 7.70 – 7.48 (m, 8H), 7.22 – 7.05 (t, *J* = 7.3 Hz, 1H). <sup>13</sup>C NMR (101 MHz, CDCl<sub>3</sub>) δ 200.36, 165.86, 141.19, 138.81, 134.70, 134.61, 134.10, 132.46, 132.09, 129.86, 128.87, 128.38, 127.45, 123.13, 122.21, 121.46.

## Copies of product NMR spectra

### 4-Phenylquinazoline (3)

#### <sup>1</sup>H NMR

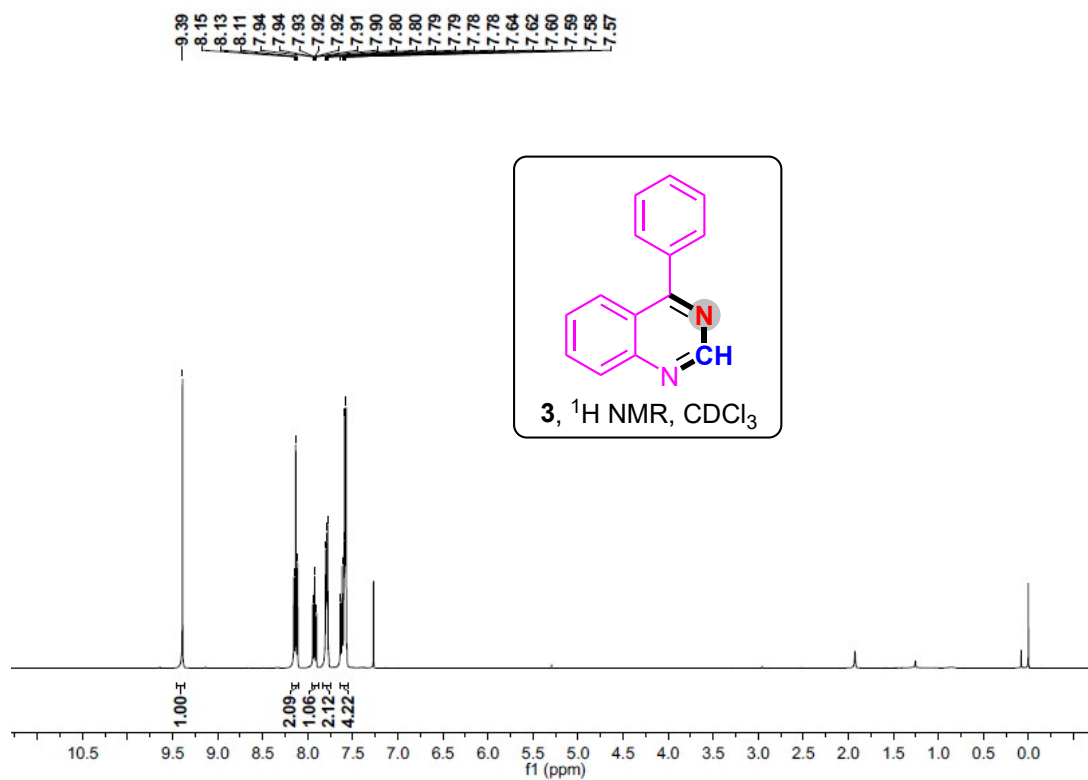

**<sup>13</sup>C NMR**

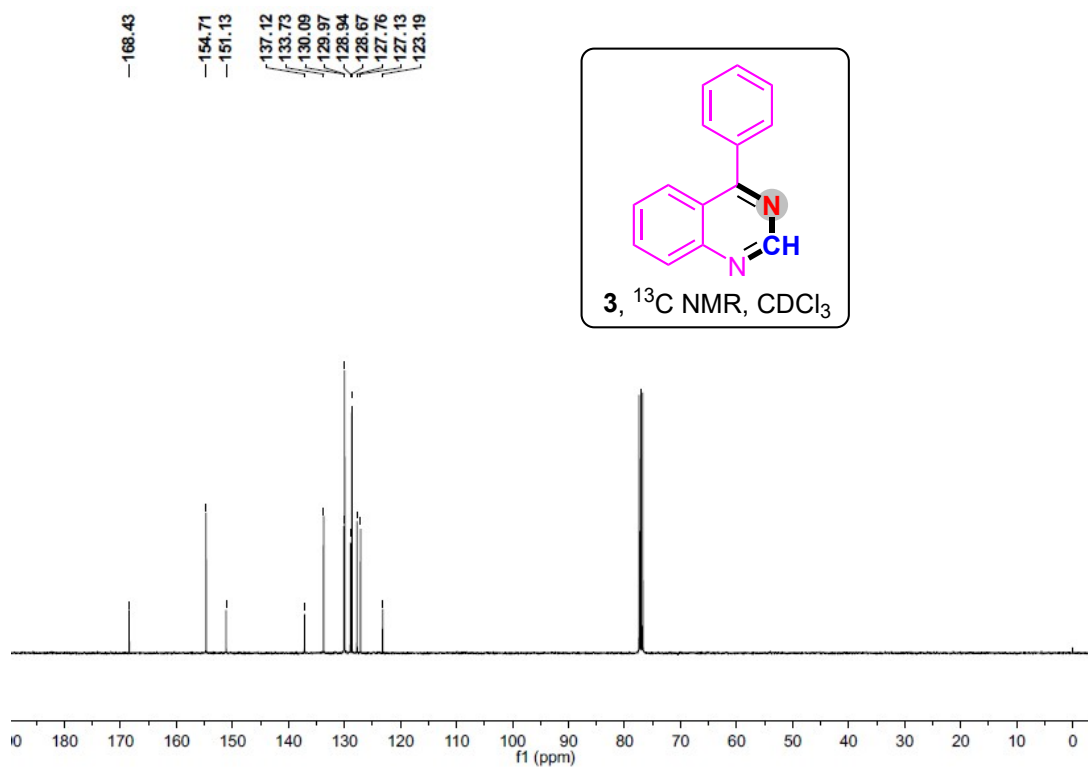

**4-(4-Fluorophenyl)quinazoline (4)**

**<sup>1</sup>H NMR**

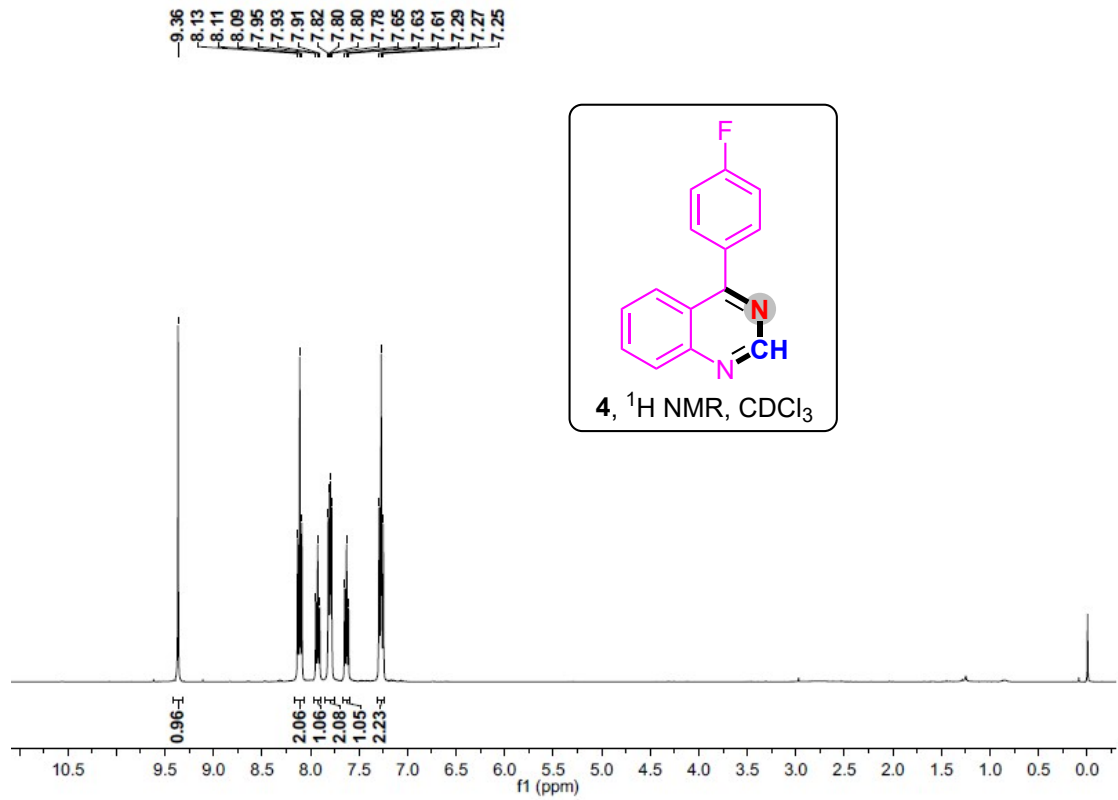

**<sup>13</sup>C NMR**

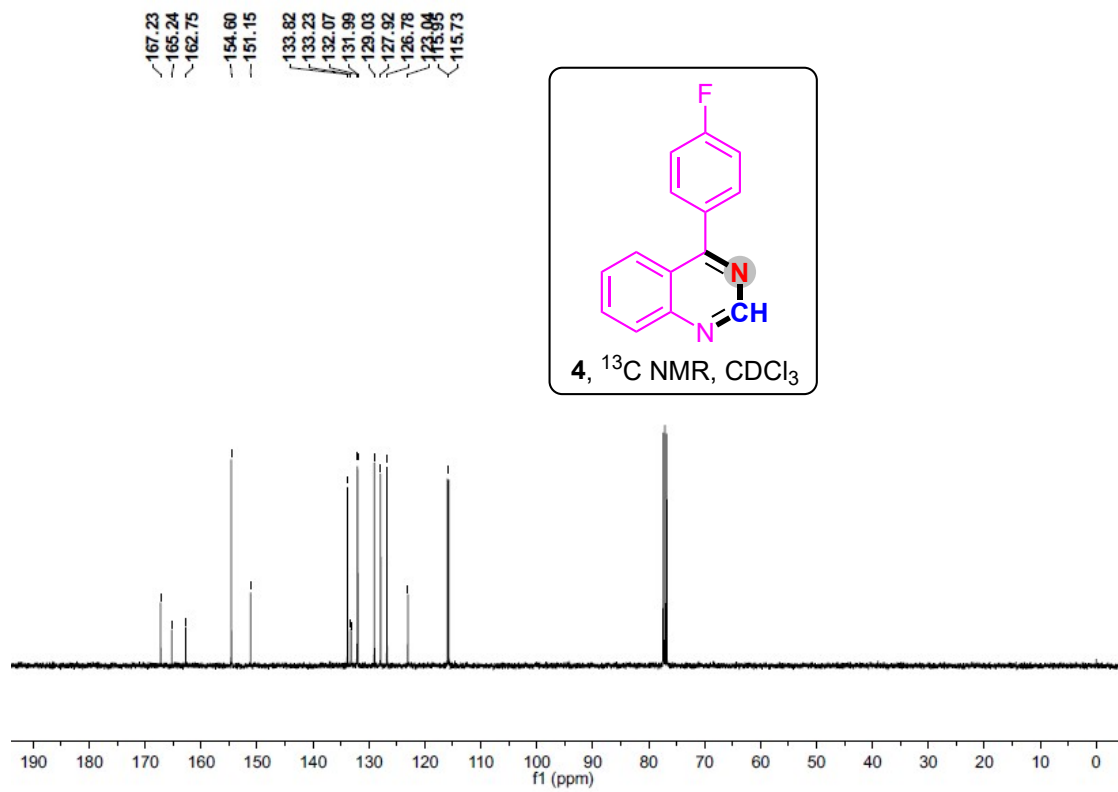

**<sup>19</sup>F NMR**

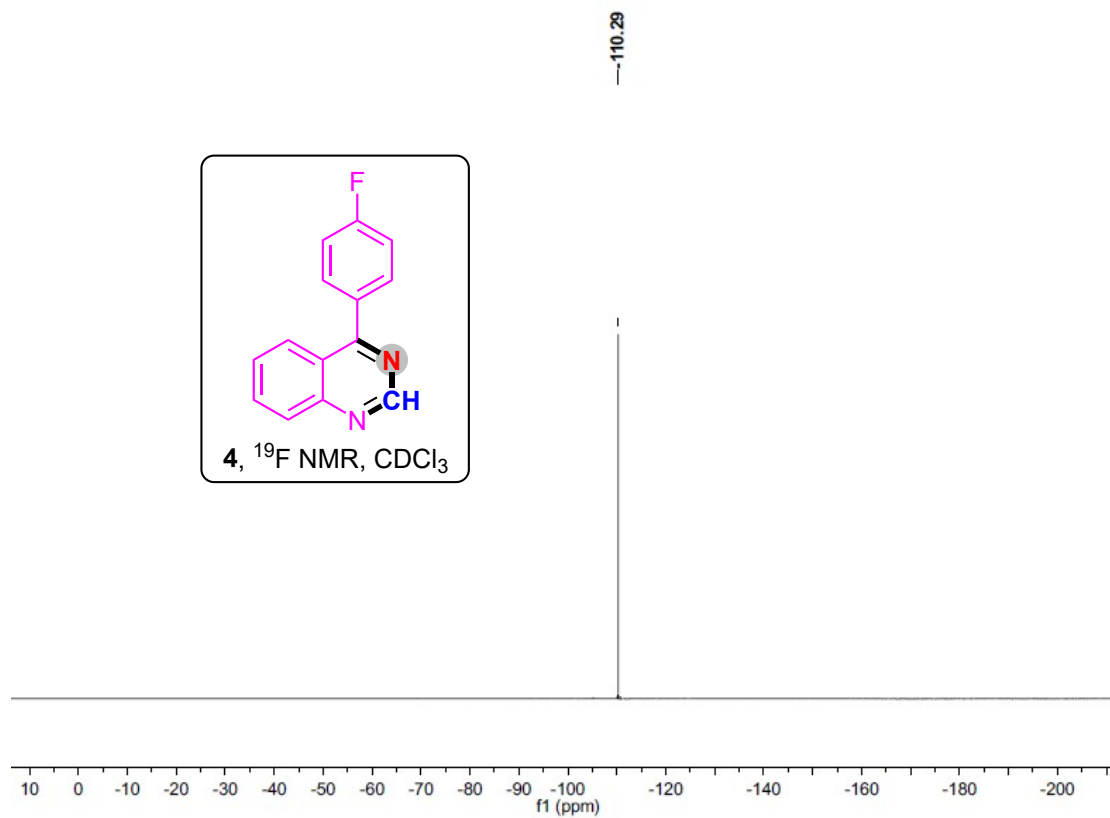

4-(4-Chlorophenyl)quinazoline (5)

### <sup>1</sup>H NMR

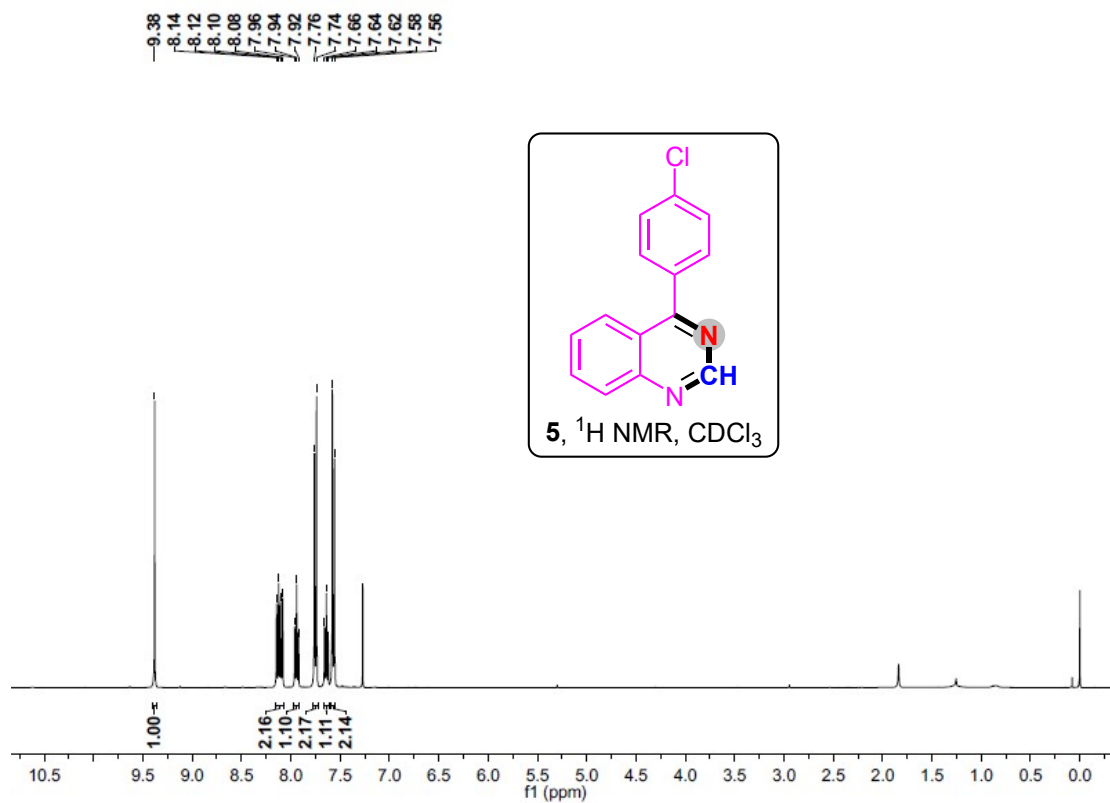

### <sup>13</sup>C NMR

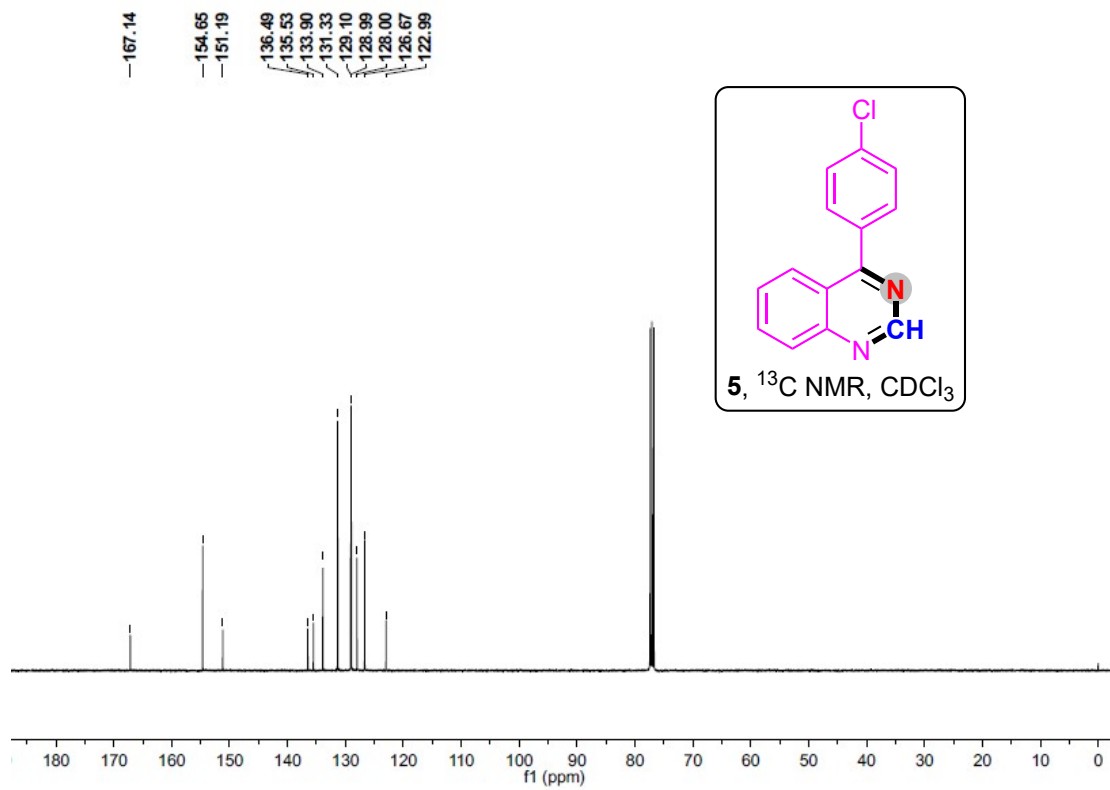

### 4-(4-Bromophenyl)quinazoline (6)

# <sup>1</sup>H NMR

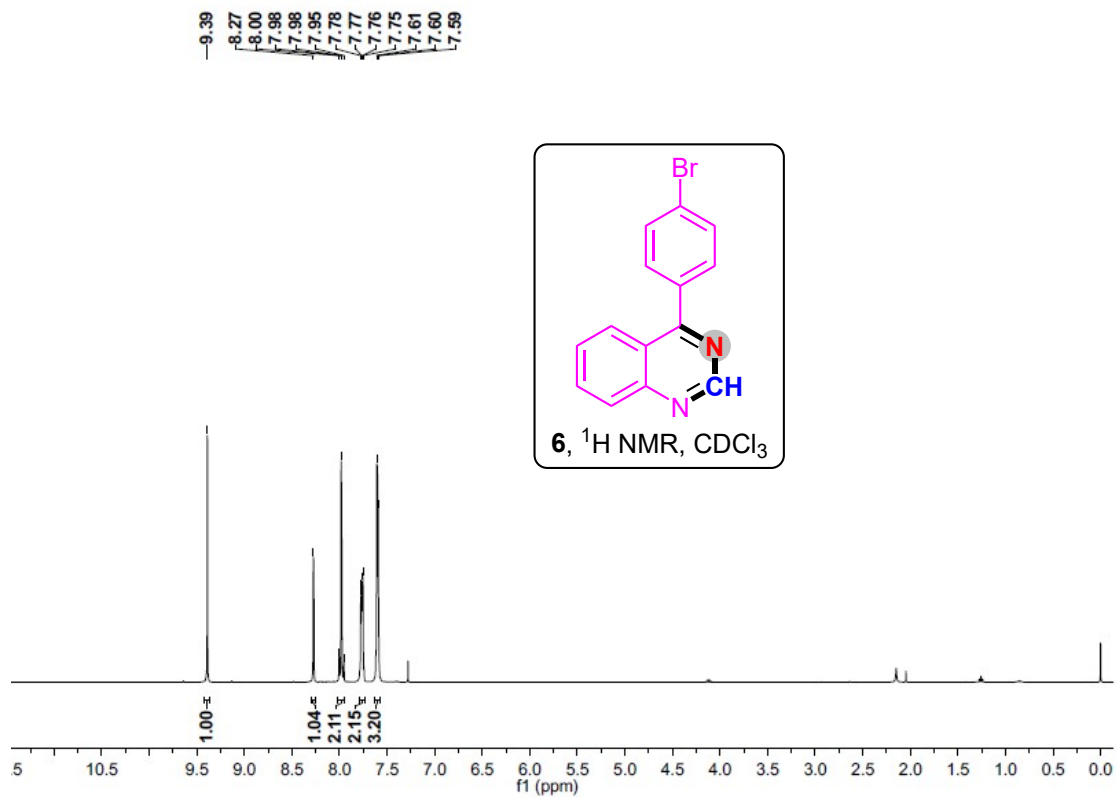

# <sup>13</sup>C NMR

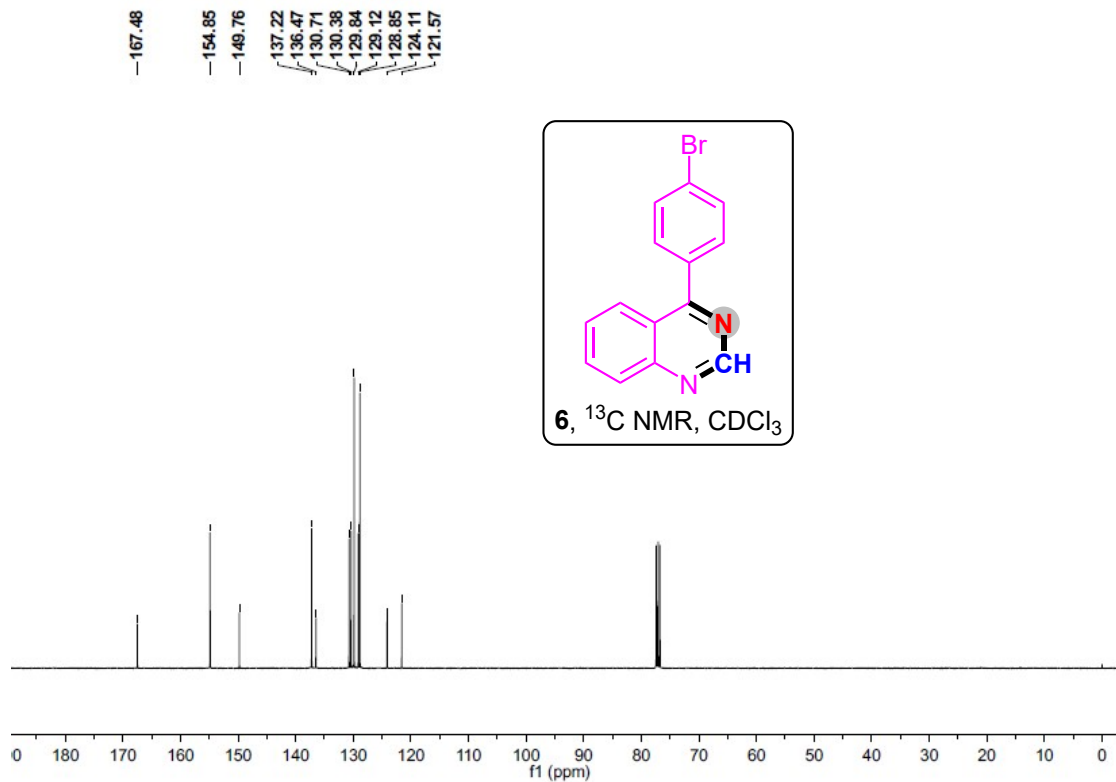

4-Cyclohexylquinazoline (7)



# <sup>1</sup>H NMR

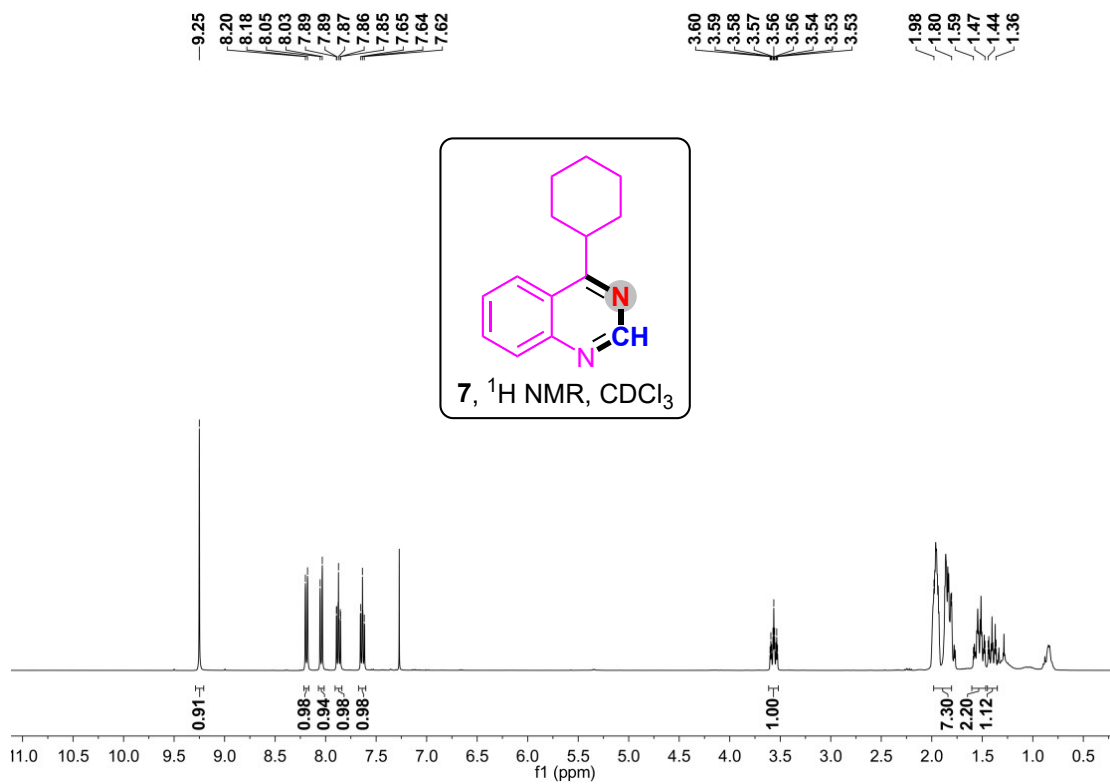

# <sup>13</sup>C NMR

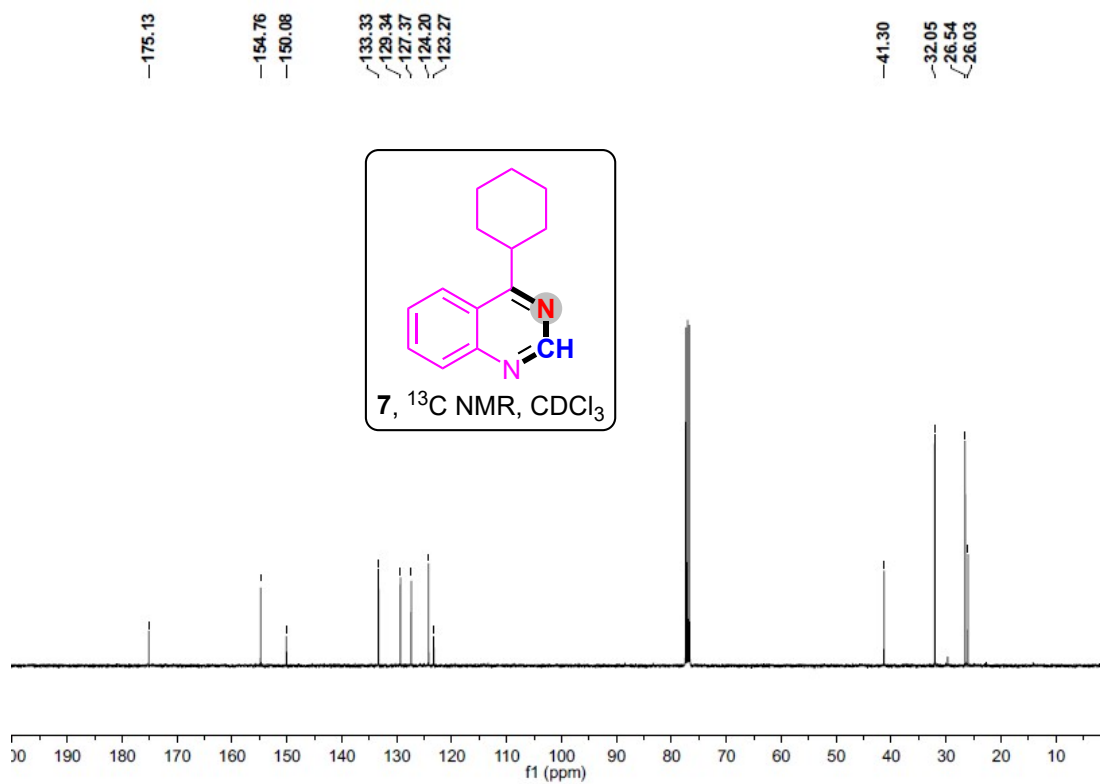

## Quinazoline (8)

### <sup>1</sup>H NMR

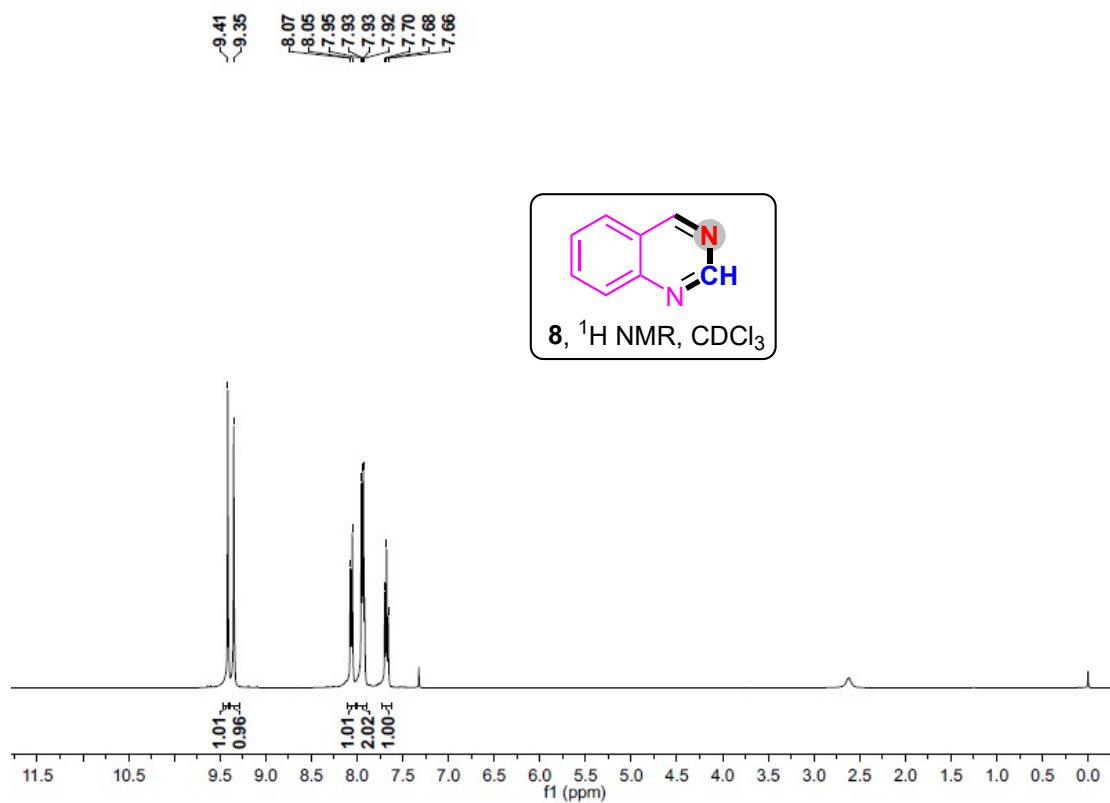

### <sup>13</sup>C NMR

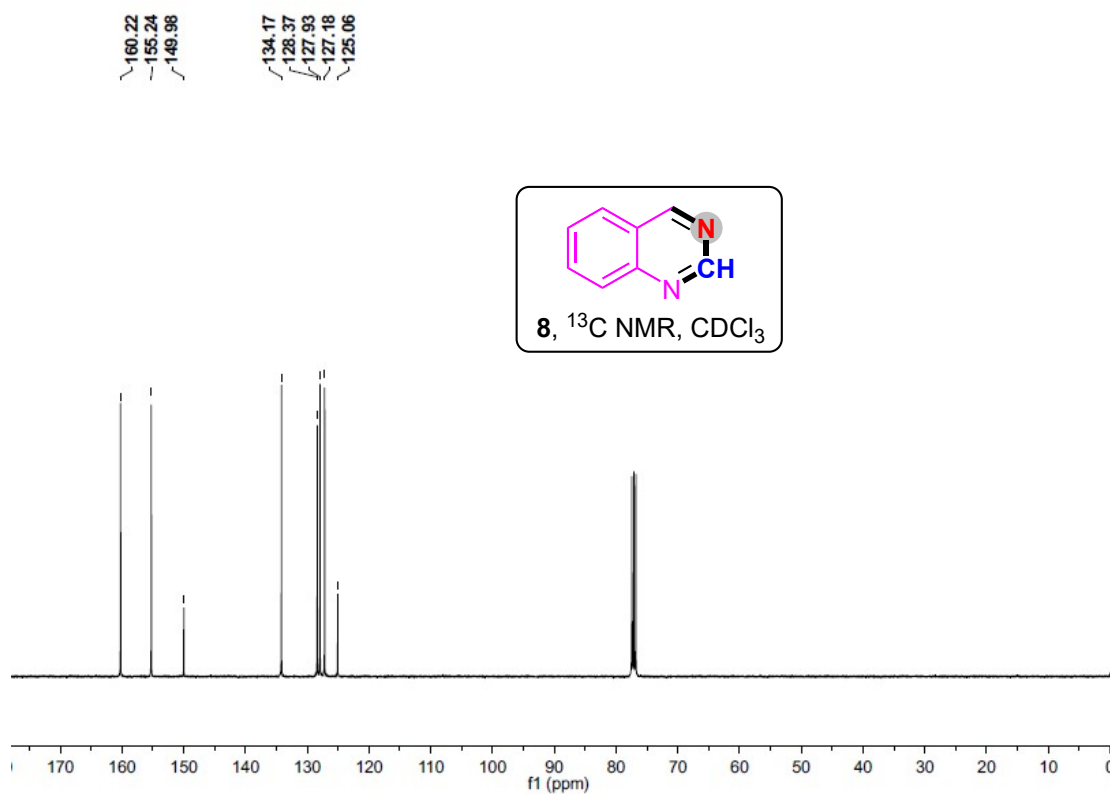

### 6-Chloro-4-phenylquinazoline (9)

### <sup>1</sup>H NMR

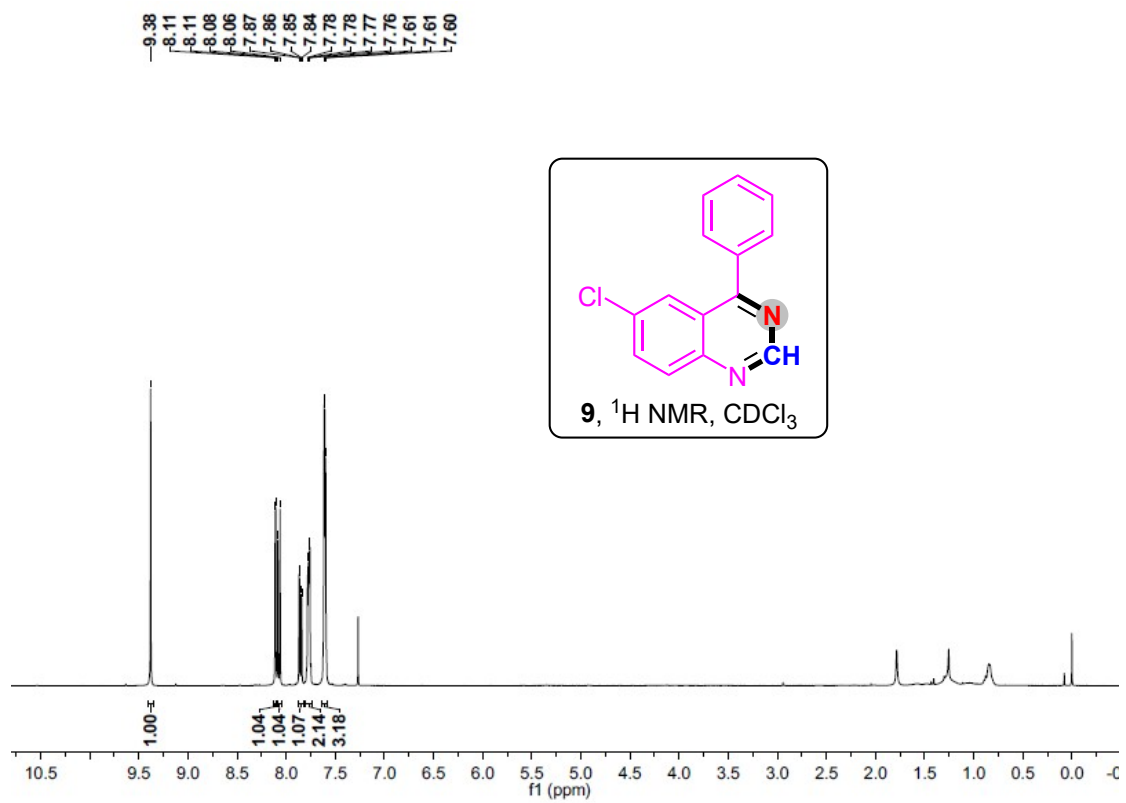

### <sup>13</sup>C NMR

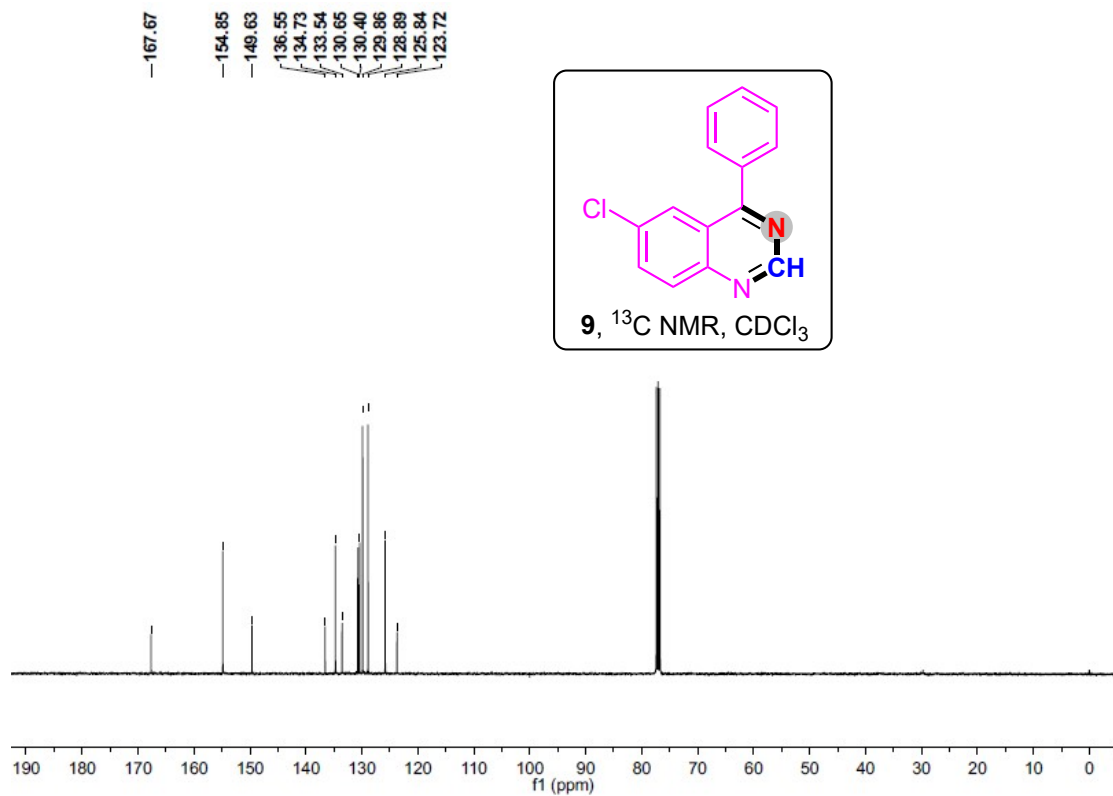

### 6-Bromo-4-phenylquinazoline (10)

### <sup>1</sup>H NMR

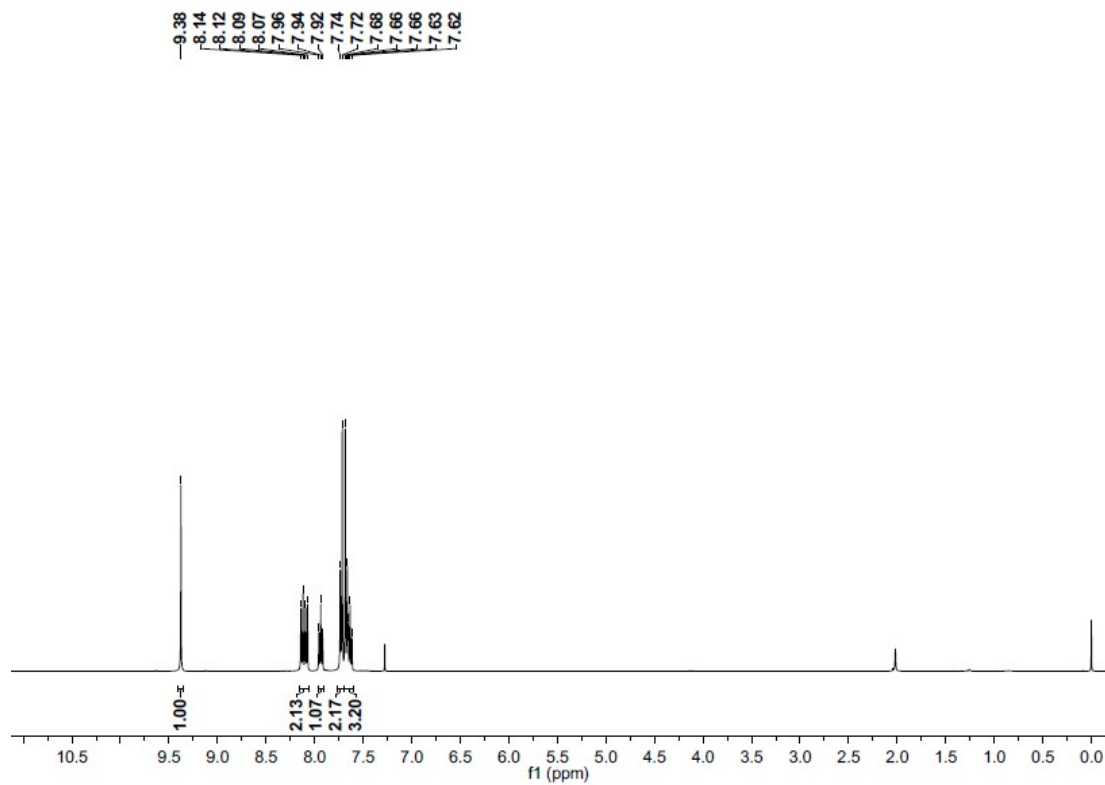

### <sup>13</sup>C NMR

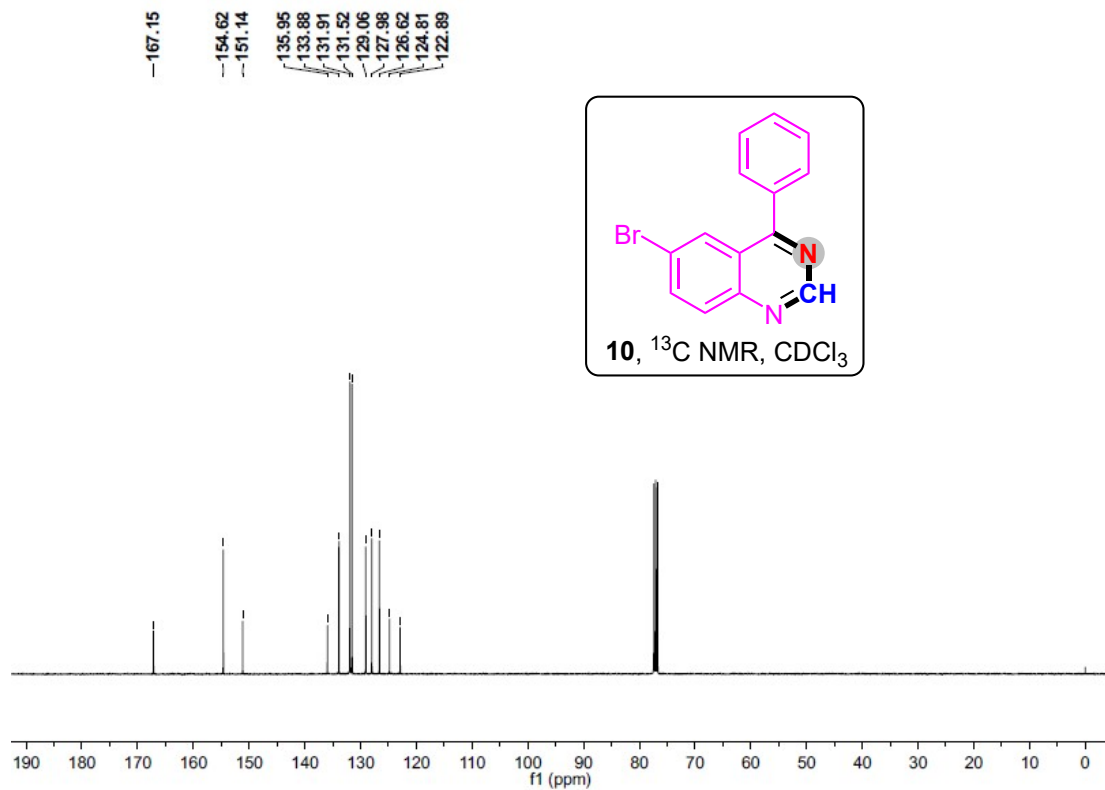

2,4-Diphenylquinazoline (11)

# <sup>1</sup>H NMR

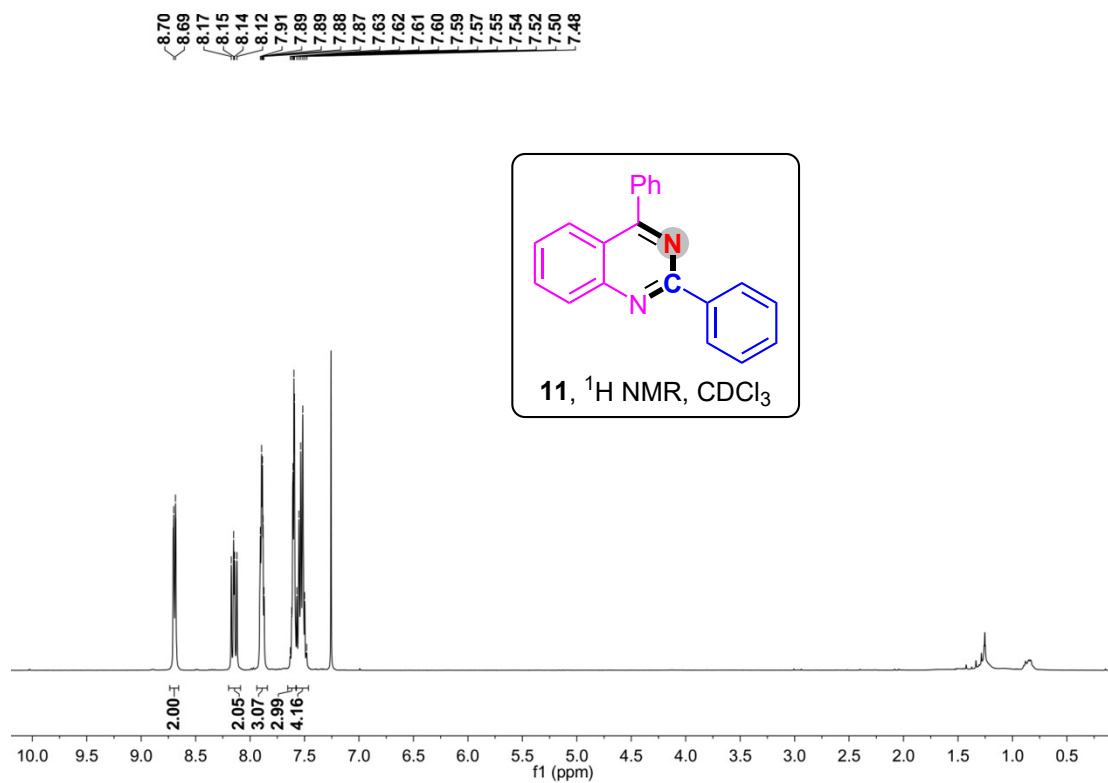

# <sup>13</sup>C NMR

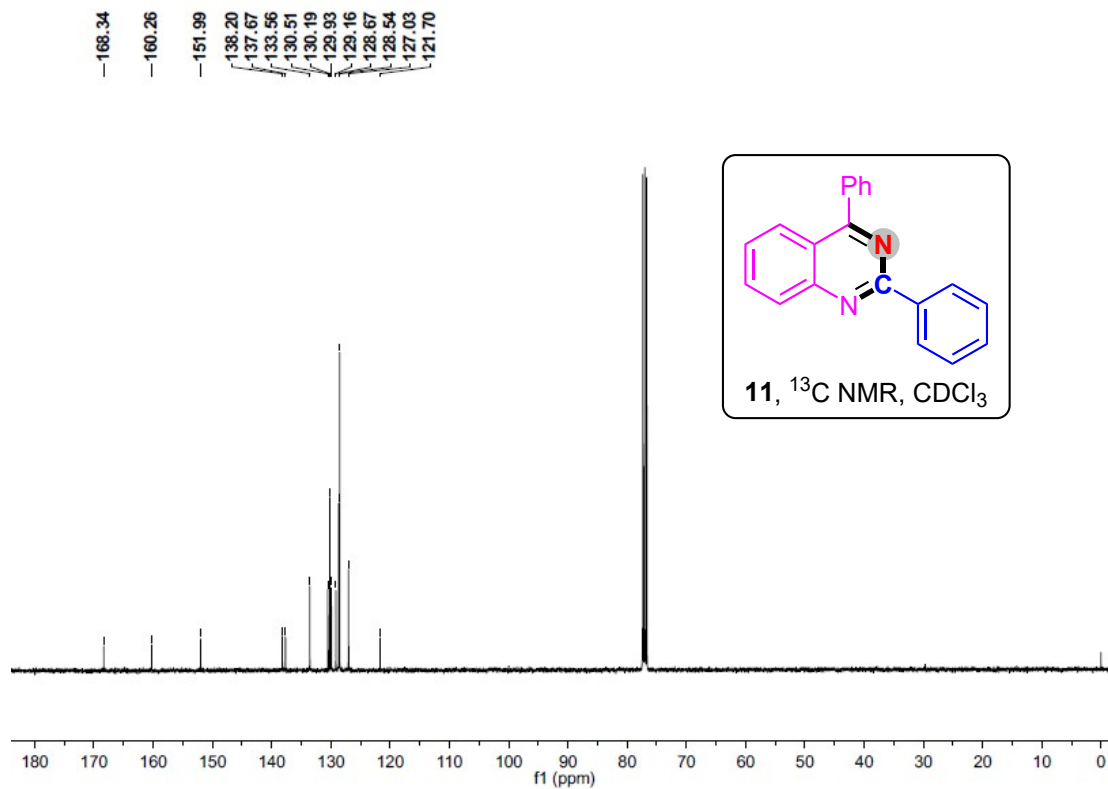

4-Phenyl-2-(*p*-tolyl)quinazoline (12)

# <sup>1</sup>H NMR

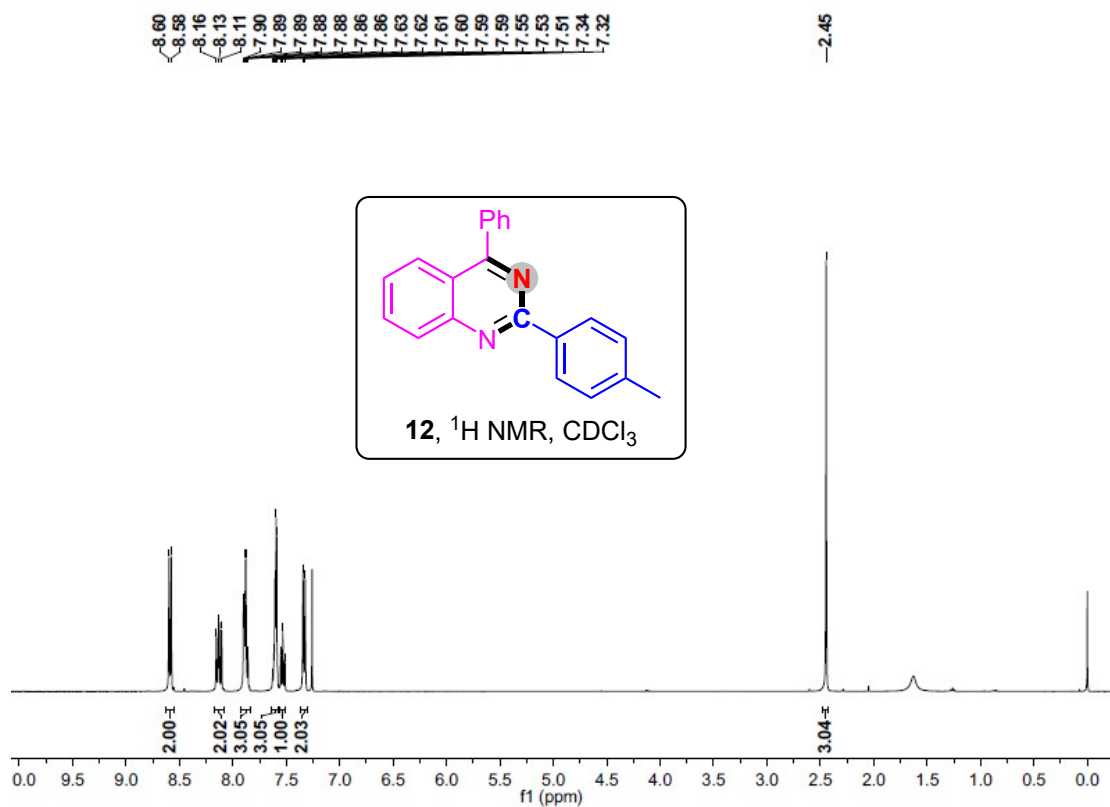

# <sup>13</sup>C NMR

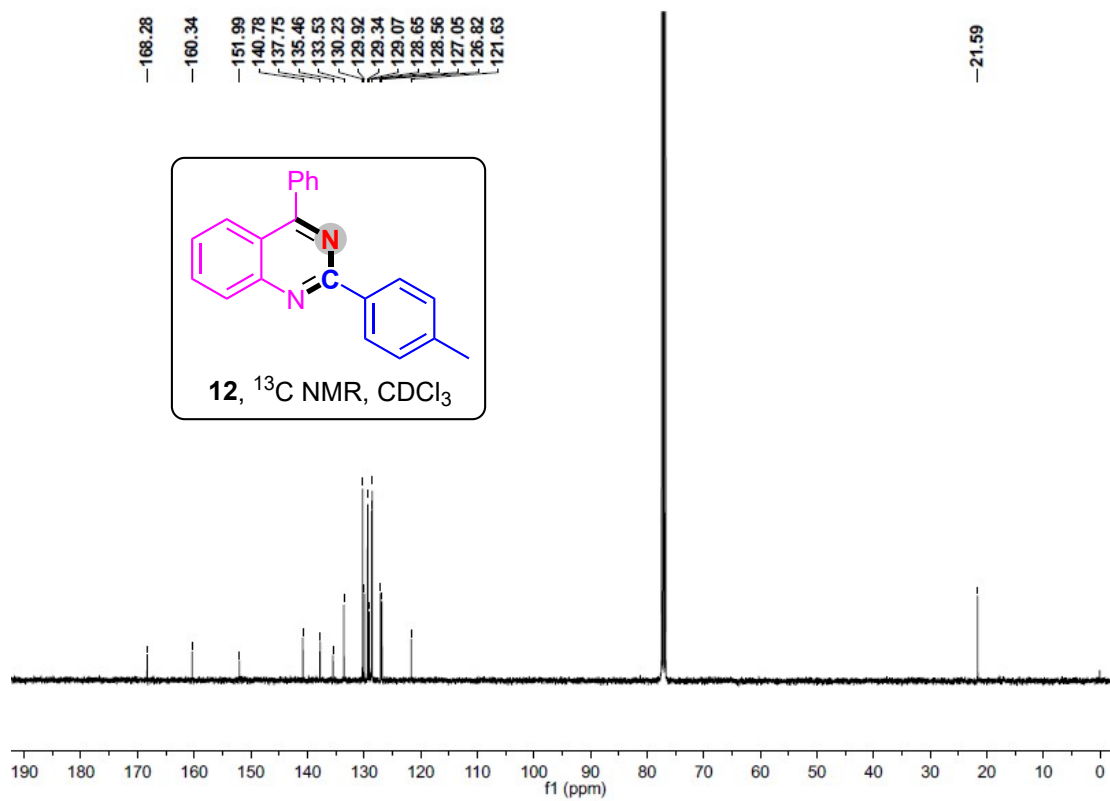

4-Phenyl-2-(*m*-tolyl)quinazoline (13)

# <sup>1</sup>H NMR

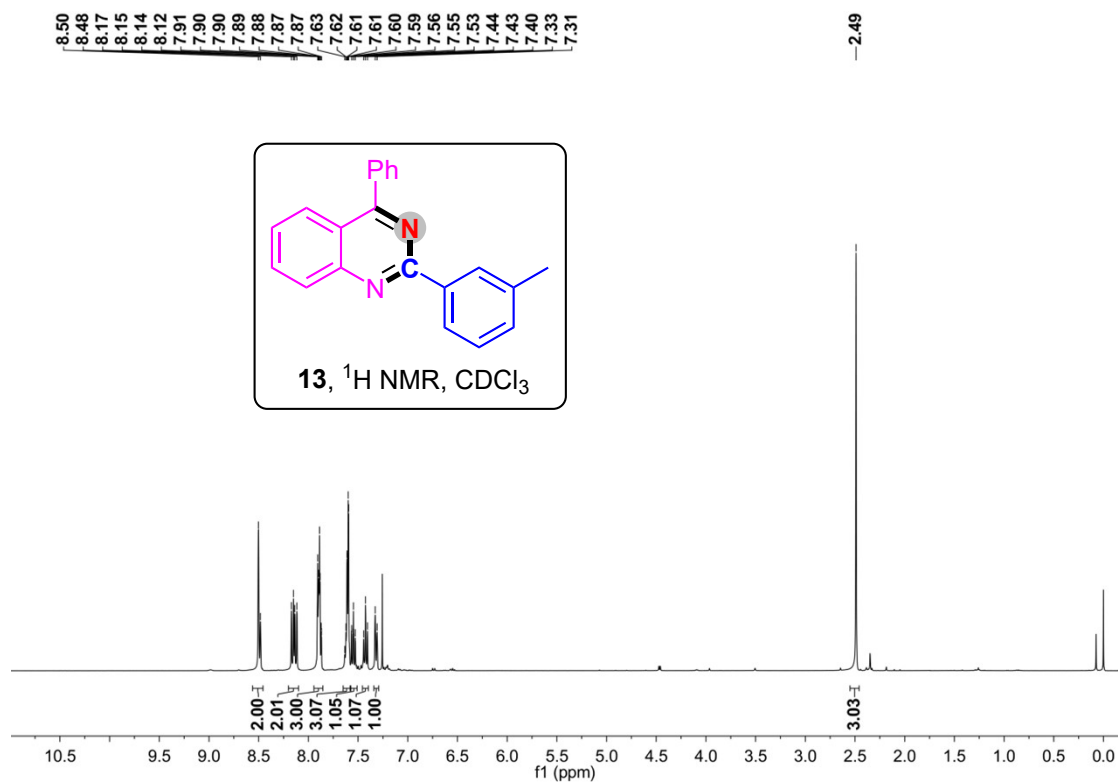

# <sup>13</sup>C NMR

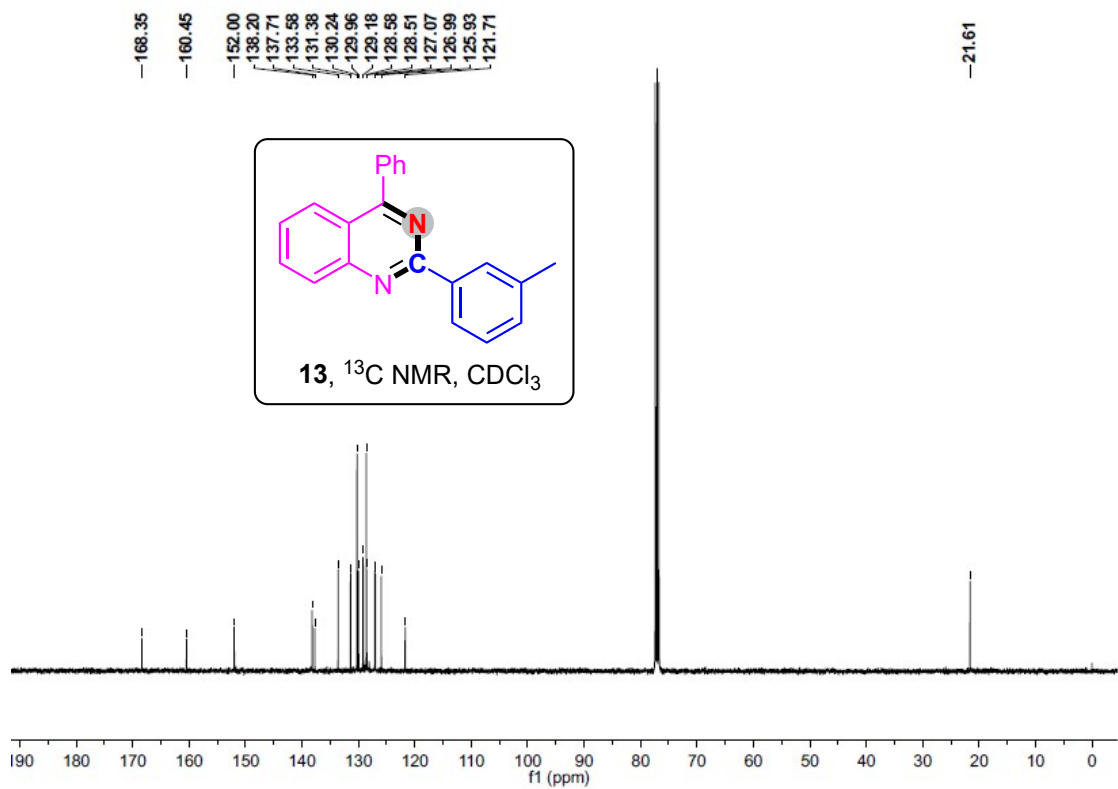

4-Phenyl-2-(*o*-tolyl)quinazoline (14)

### <sup>1</sup>H NMR

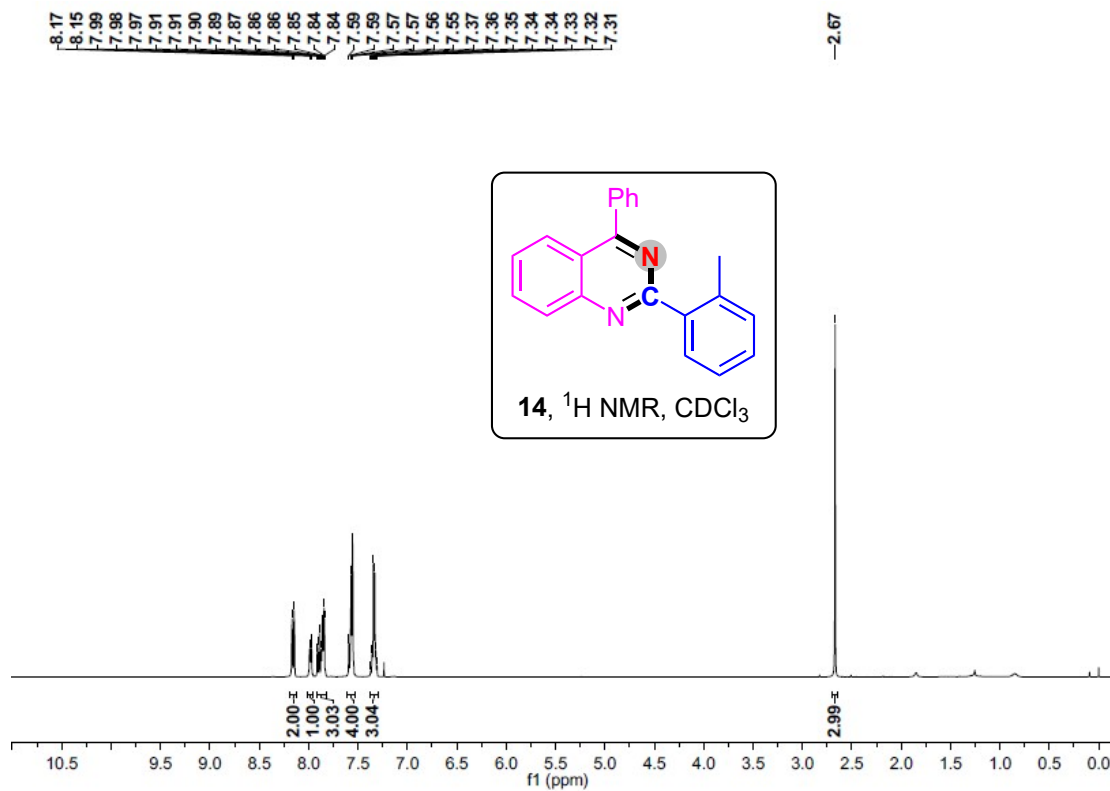

### <sup>13</sup>C NMR

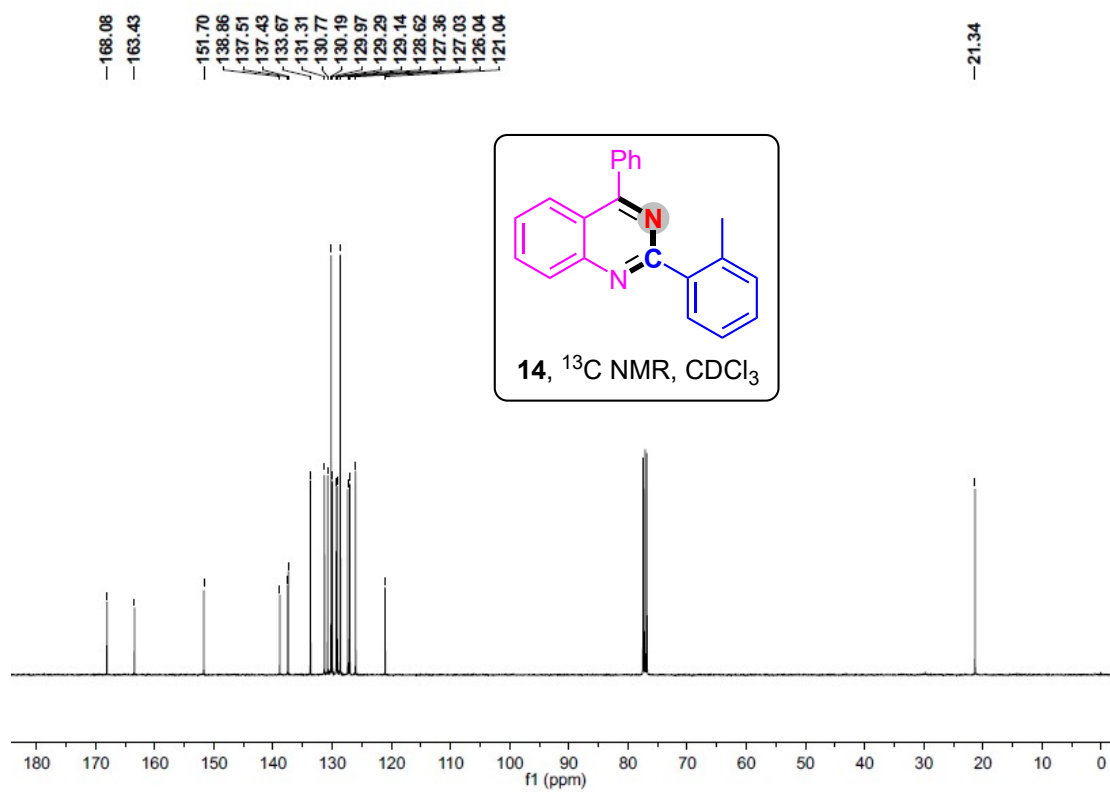

2-(4-(*tert*-Butyl)phenyl)-4-phenylquinazoline (**15**)



# <sup>1</sup>H NMR

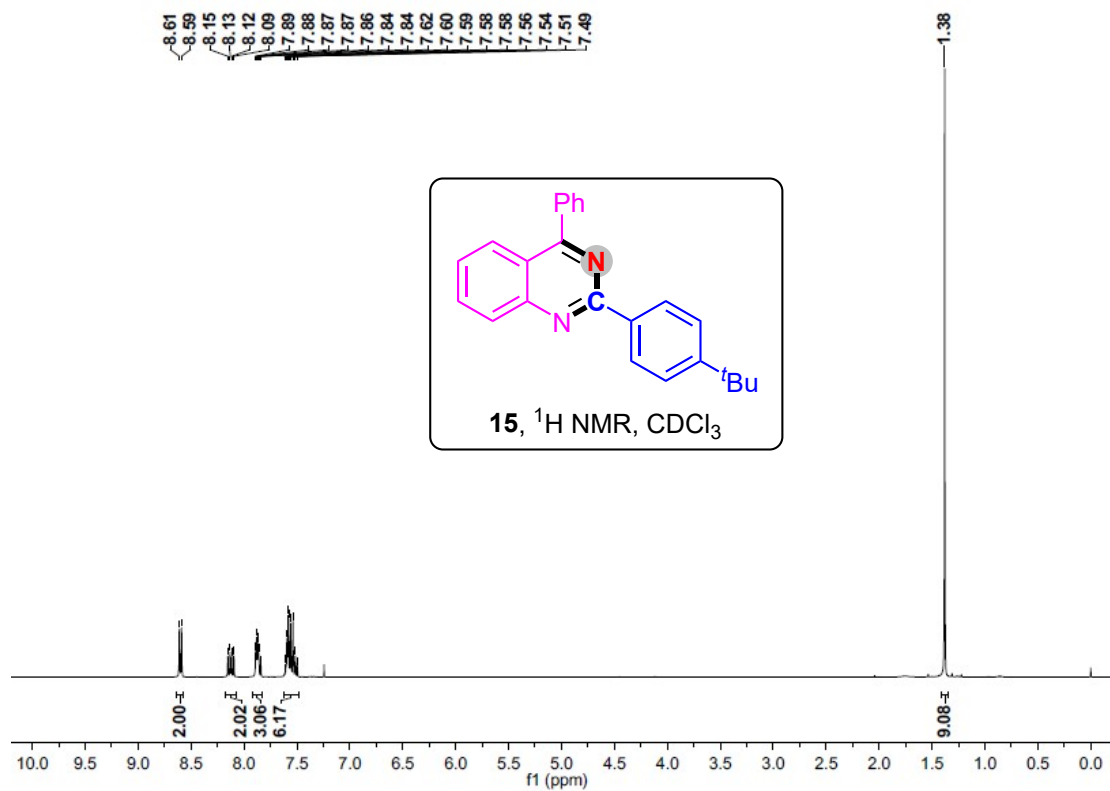

# <sup>13</sup>C NMR

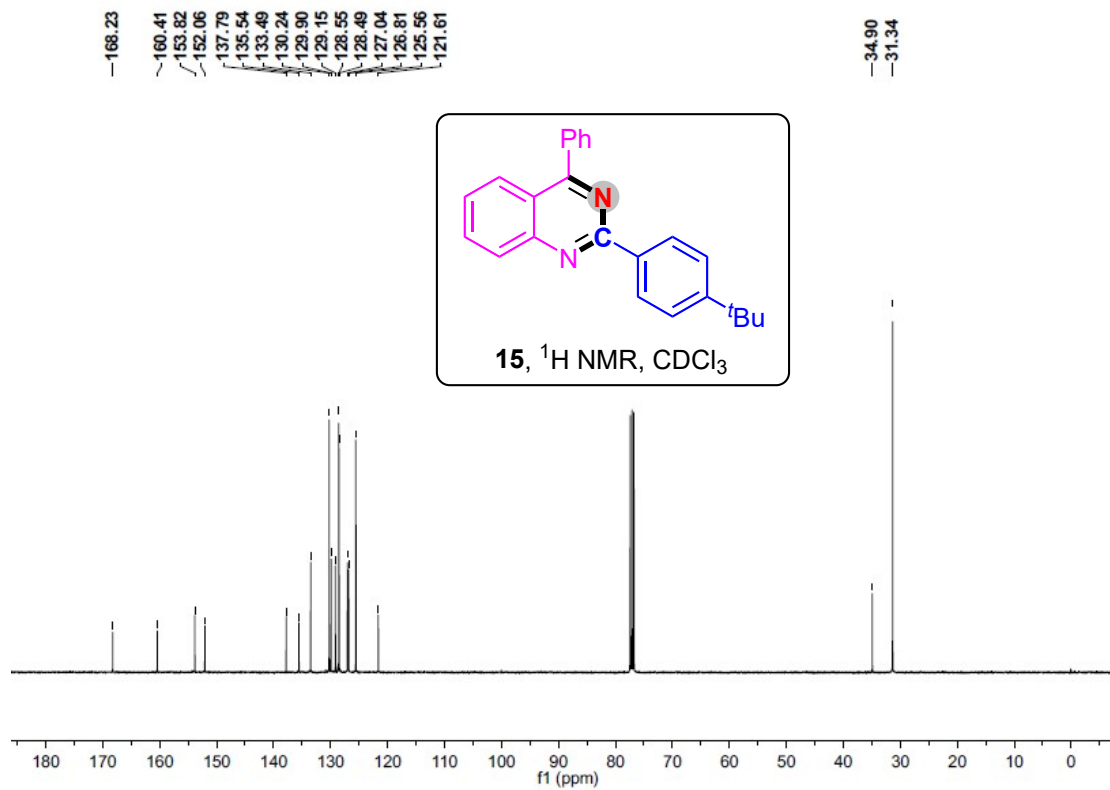

2-(4-Methoxyphenyl)-4-phenylquinazoline (16)

# <sup>1</sup>H NMR

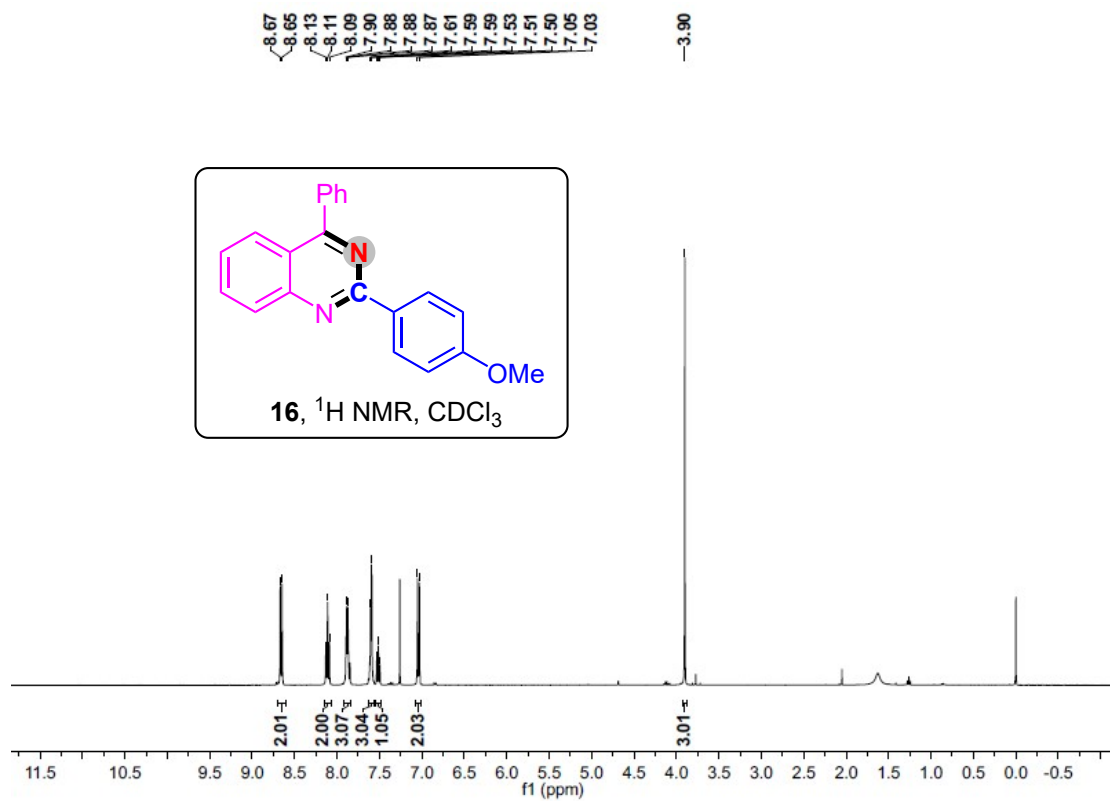

# <sup>13</sup>C NMR

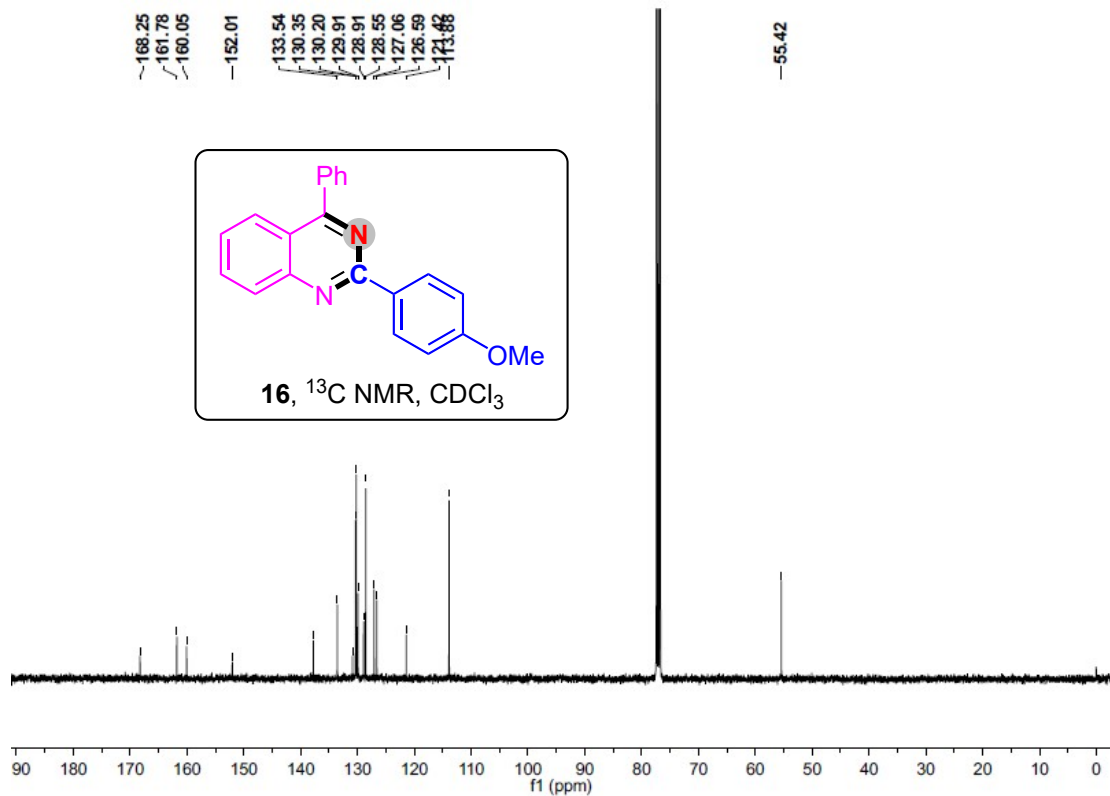

2-(4-Fluorophenyl)-4-phenylquinazoline (17)

### <sup>1</sup>H NMR

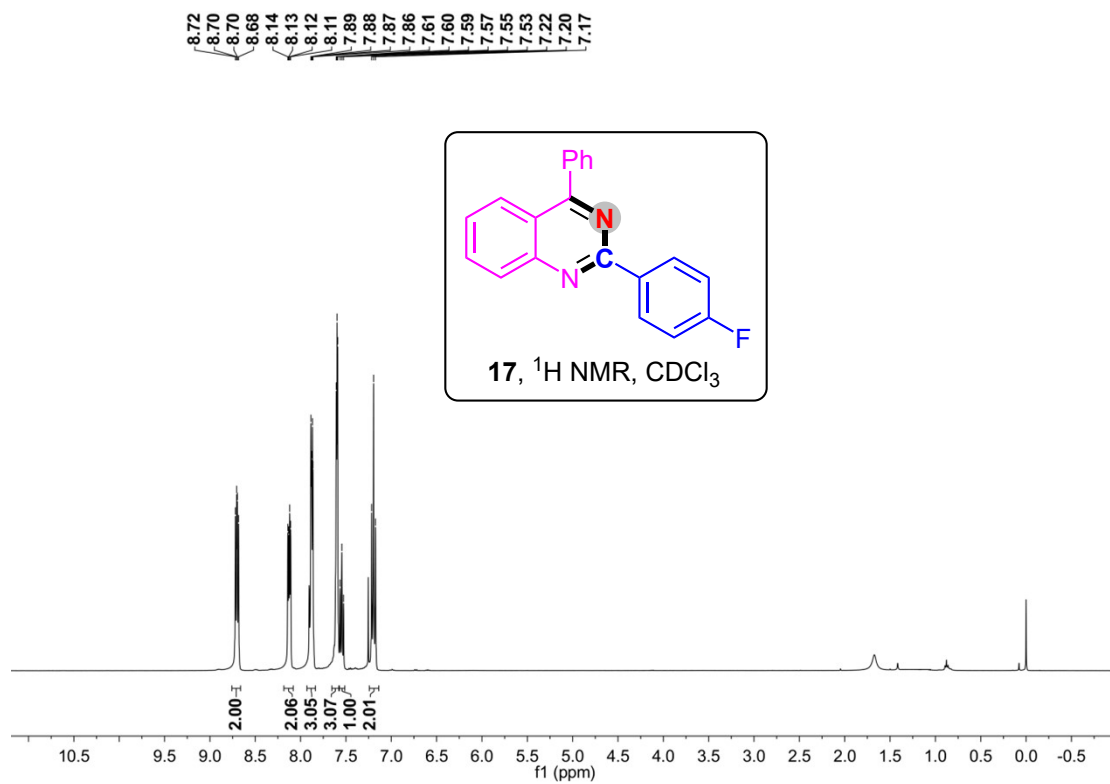

### <sup>13</sup>C NMR

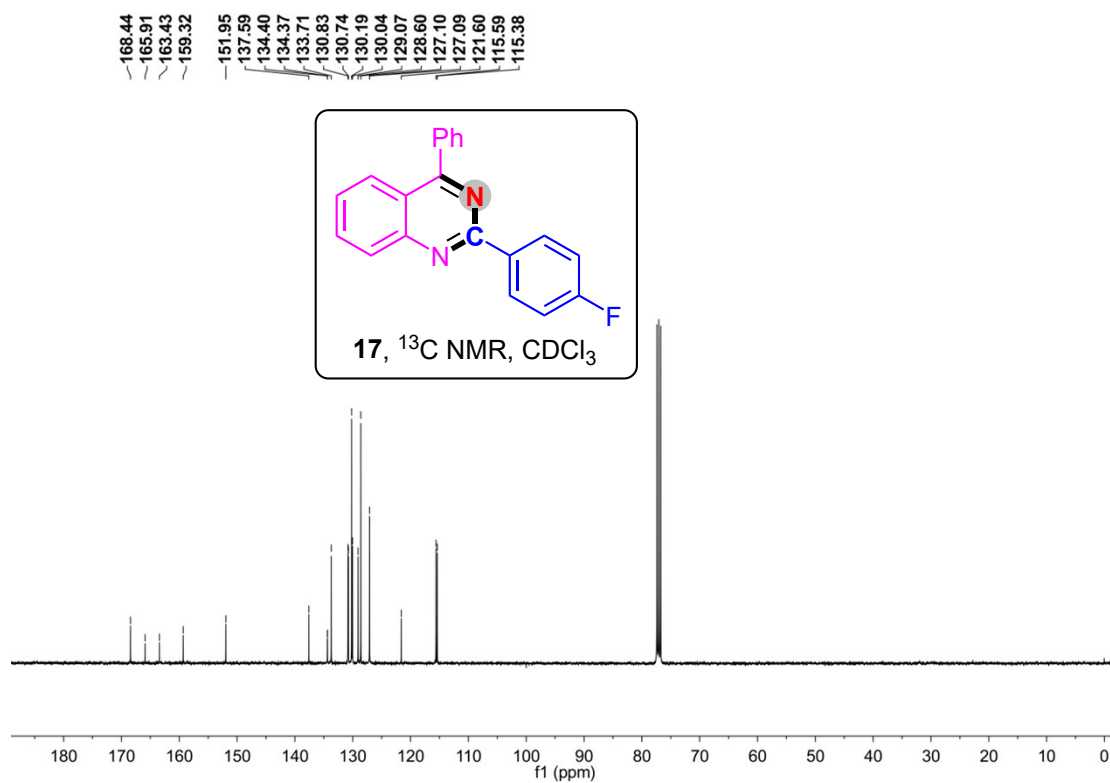

### <sup>19</sup>F NMR

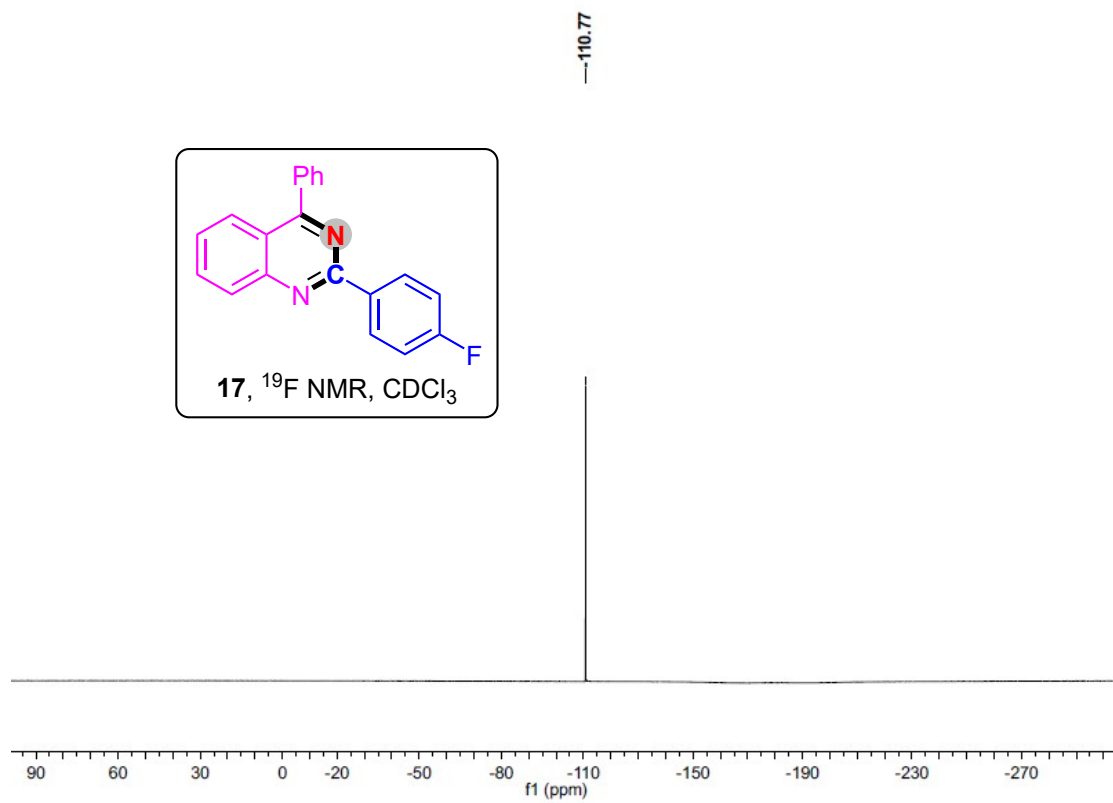

**2-(4-Chlorophenyl)-4-phenylquinazoline (18)**

### <sup>1</sup>H NMR

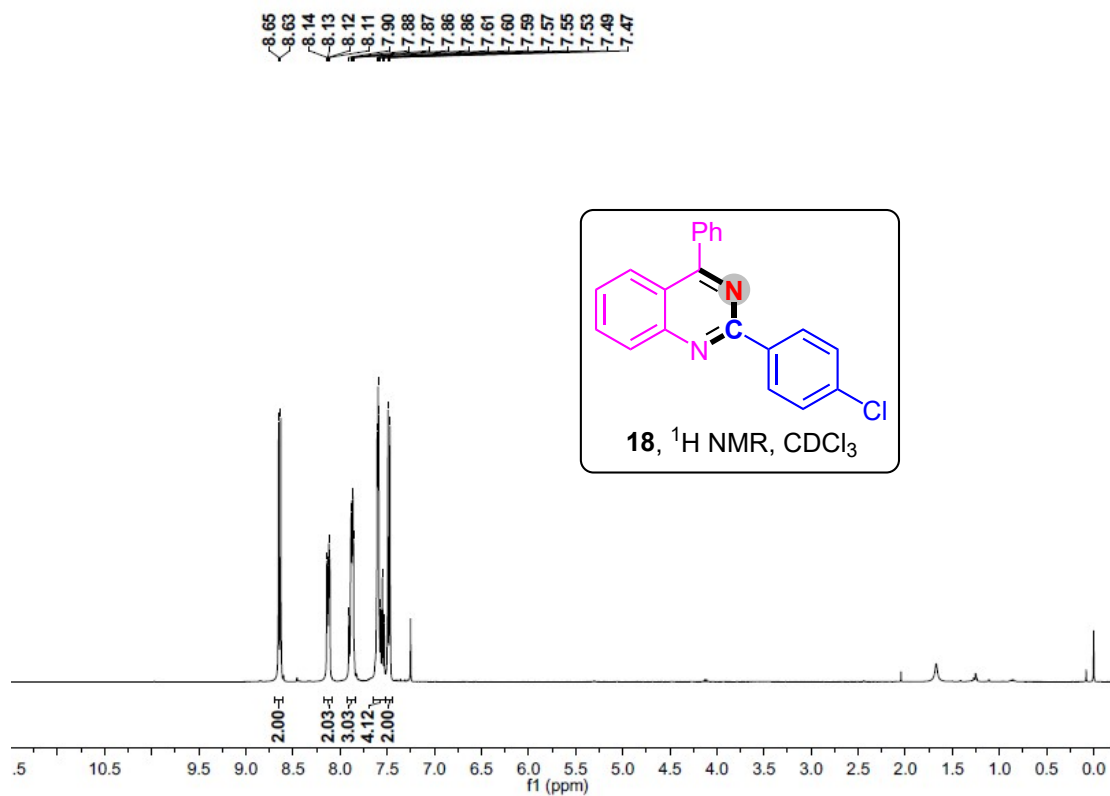

### <sup>13</sup>C NMR

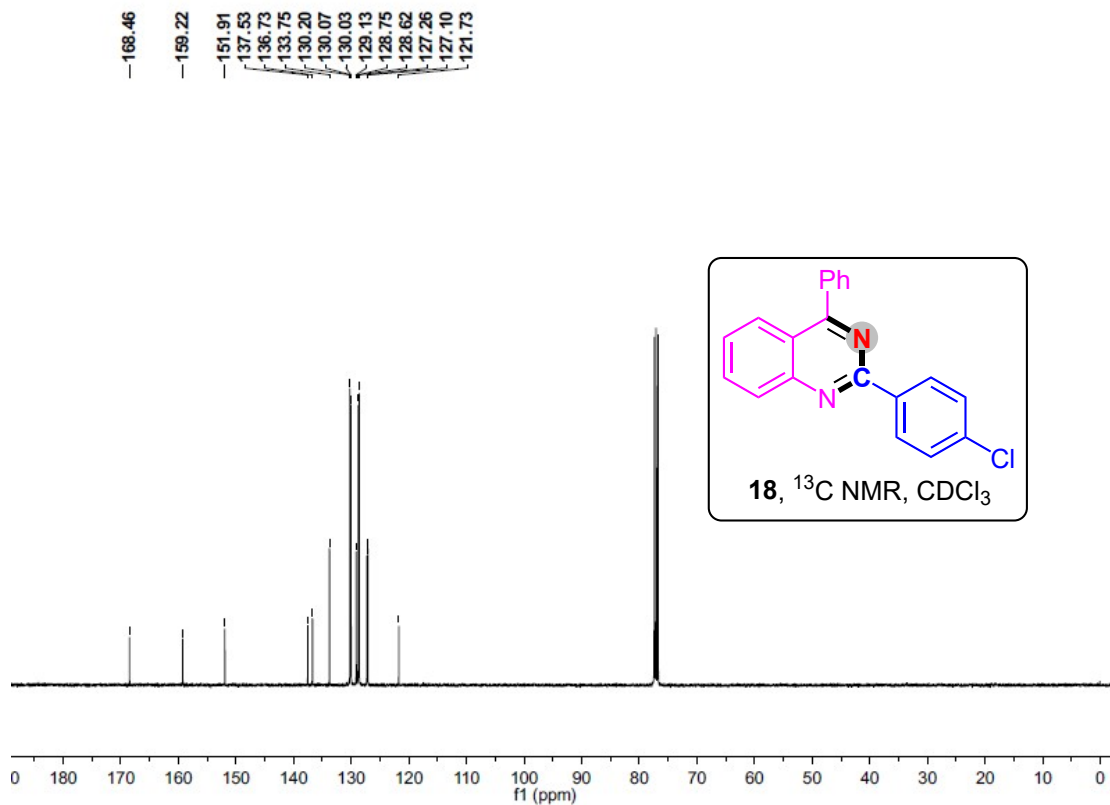

2-(4-Bromophenyl)-4-phenylquinazoline (19)

# <sup>1</sup>H NMR

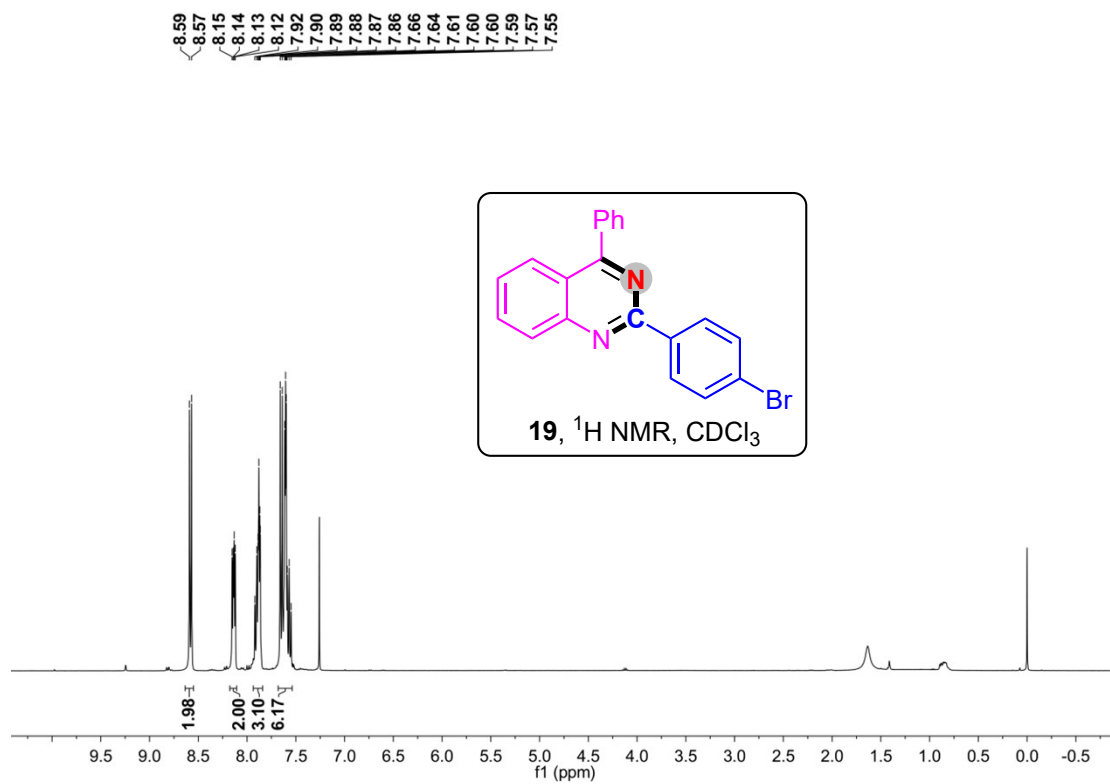

# <sup>13</sup>C NMR

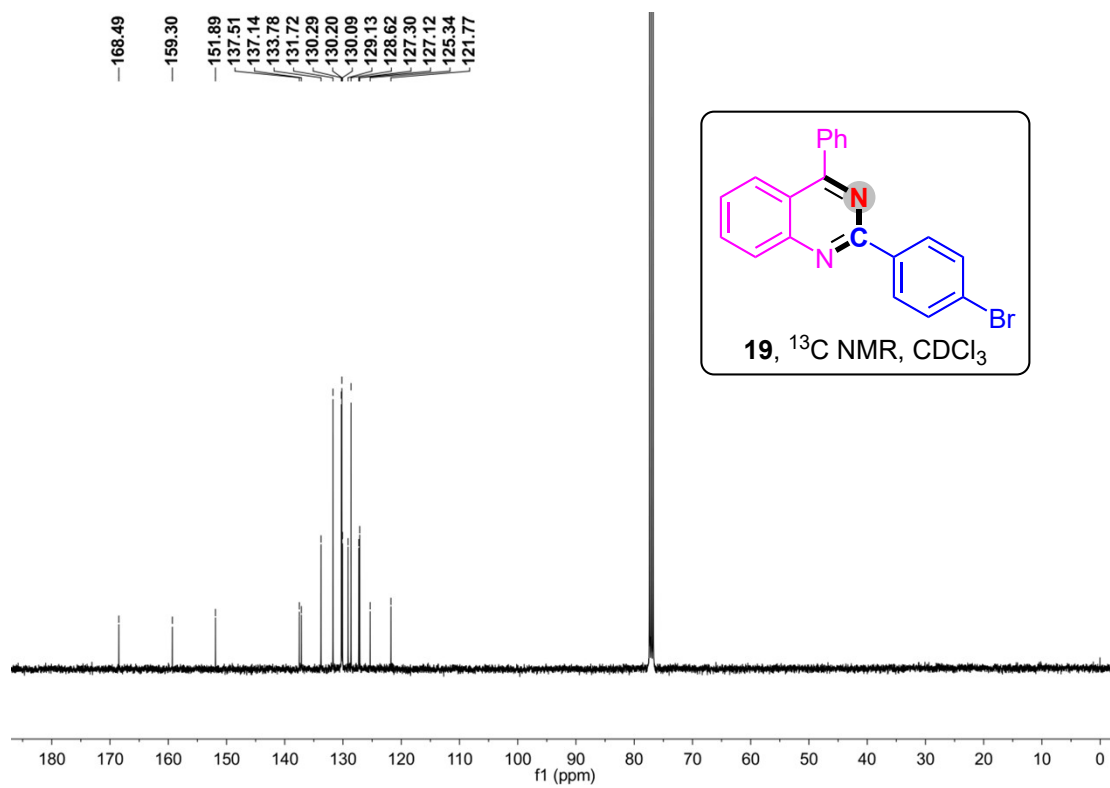

2-(3,5-Dimethylphenyl)-4-phenylquinazoline (20)

### <sup>1</sup>H NMR

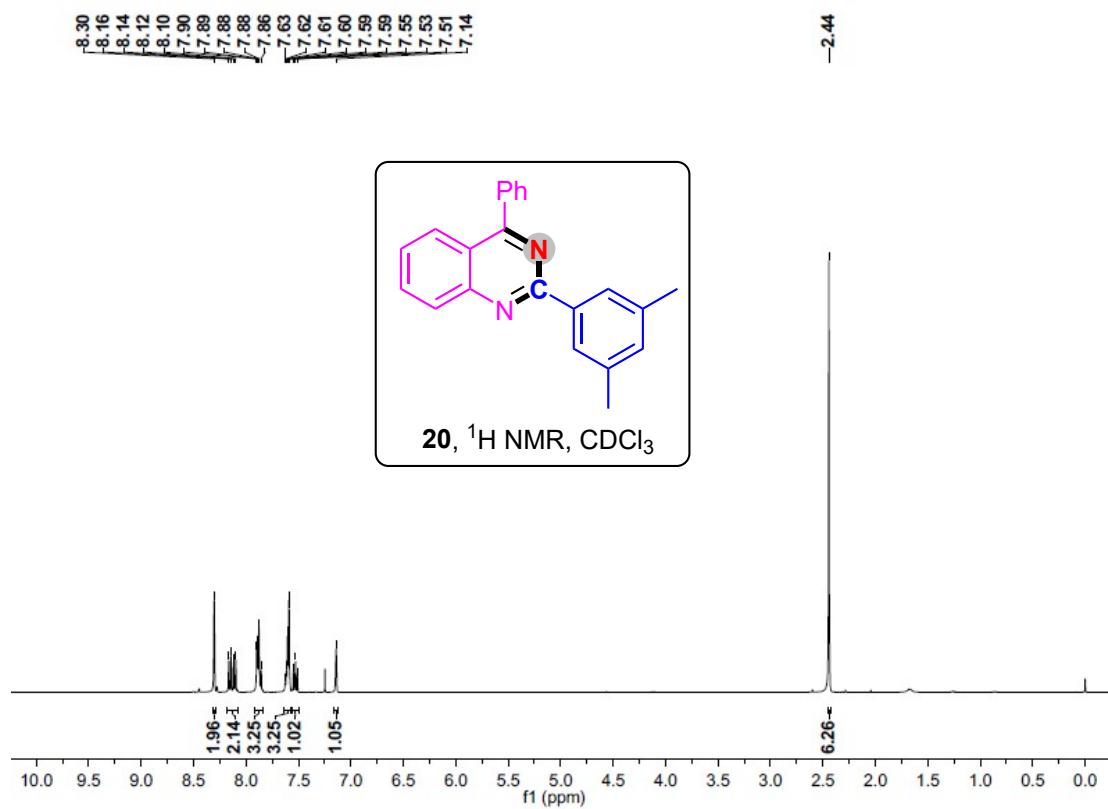

### <sup>13</sup>C NMR

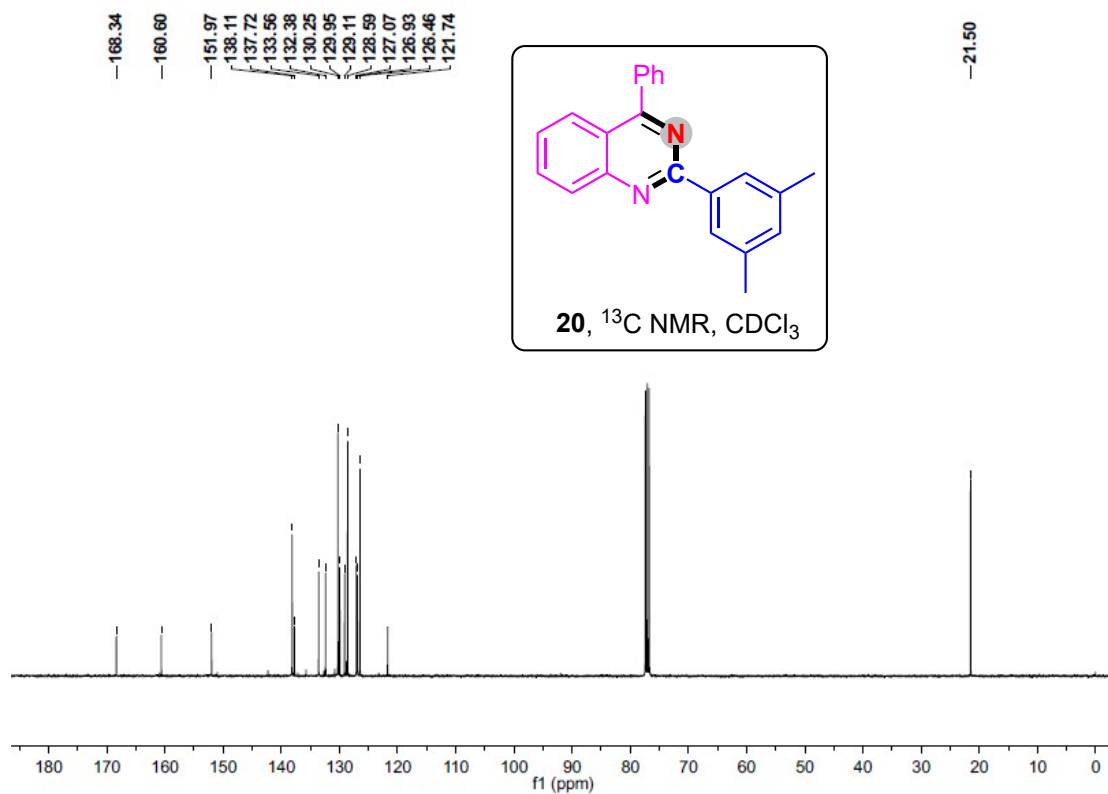

2-(Naphthalen-1-yl)-4-phenylquinazoline (21)

# <sup>1</sup>H NMR

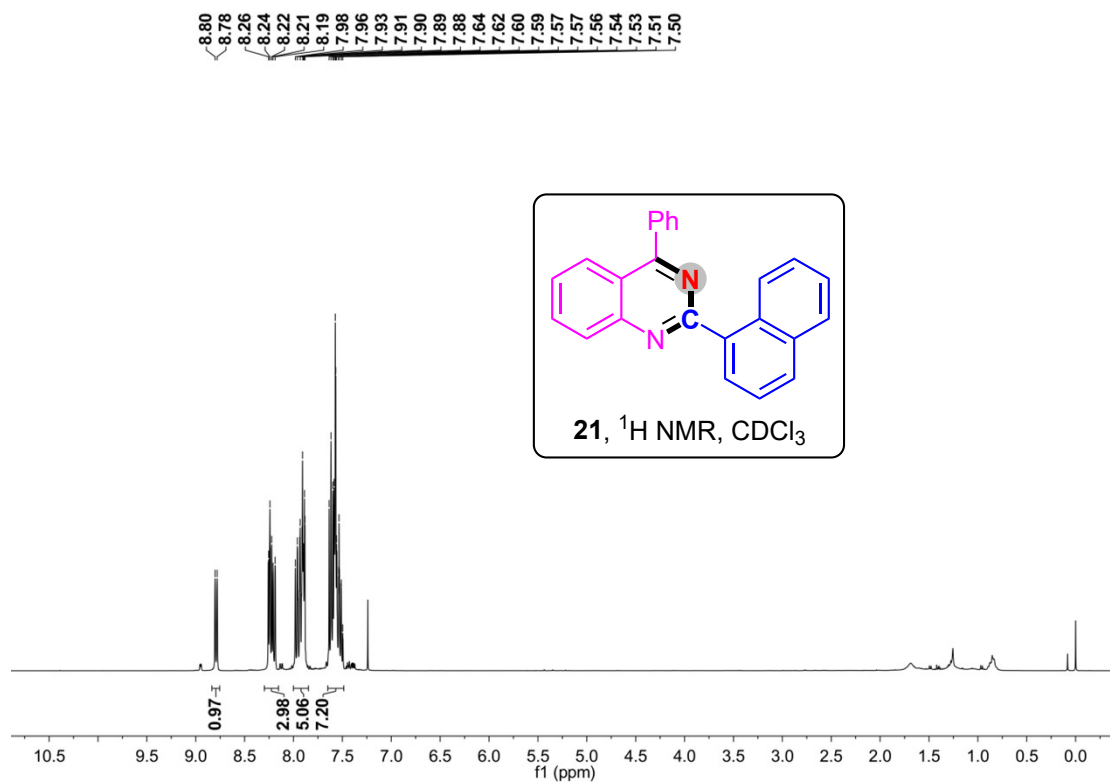

# <sup>13</sup>C NMR

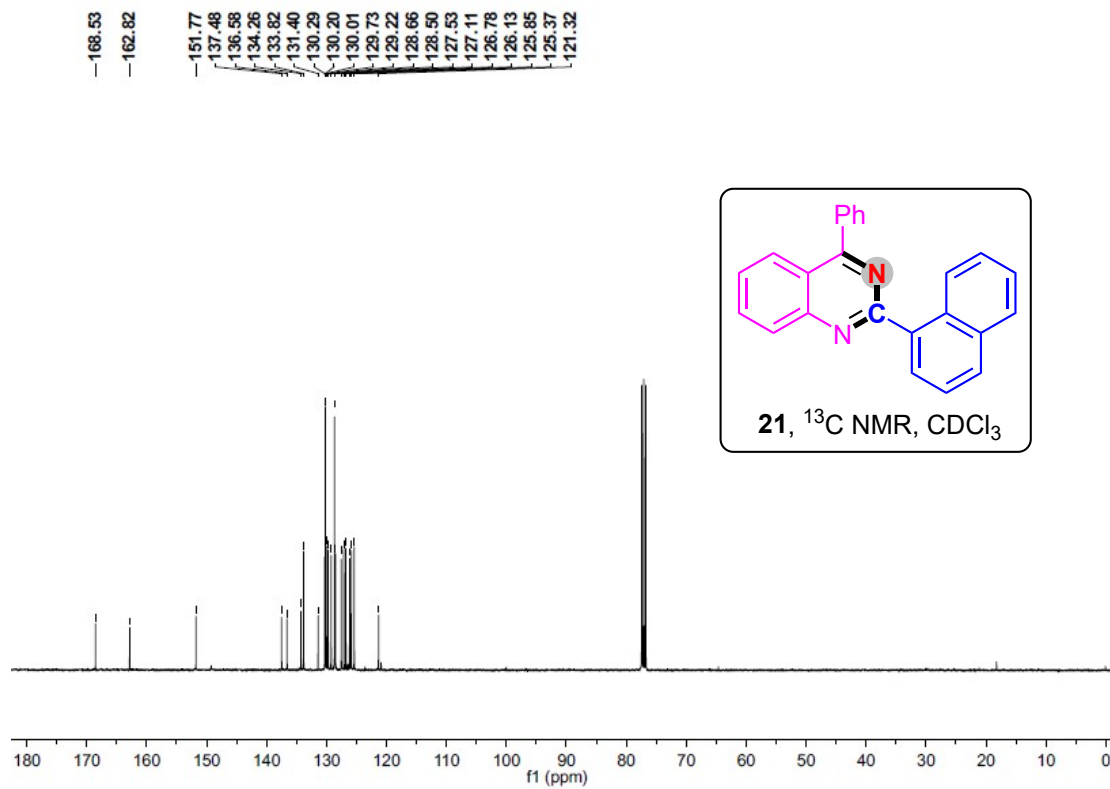

2-(Naphthalen-2-yl)-4-phenylquinazoline (22)



# <sup>1</sup>H NMR

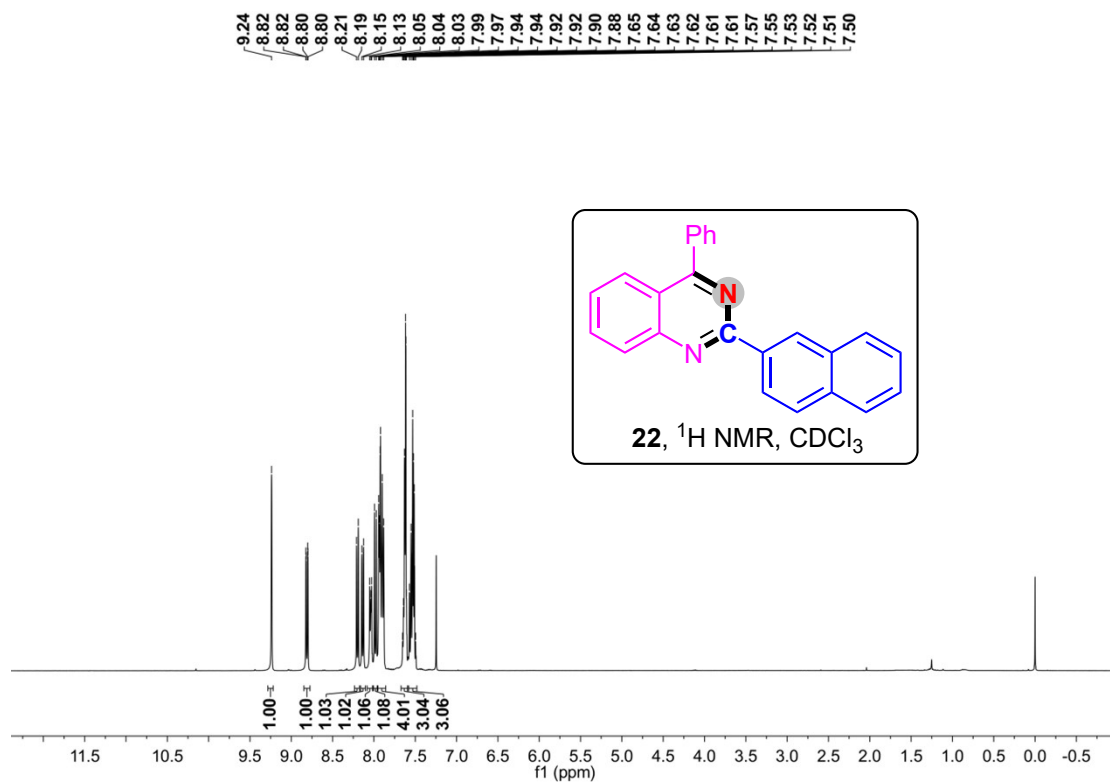

# <sup>13</sup>C NMR

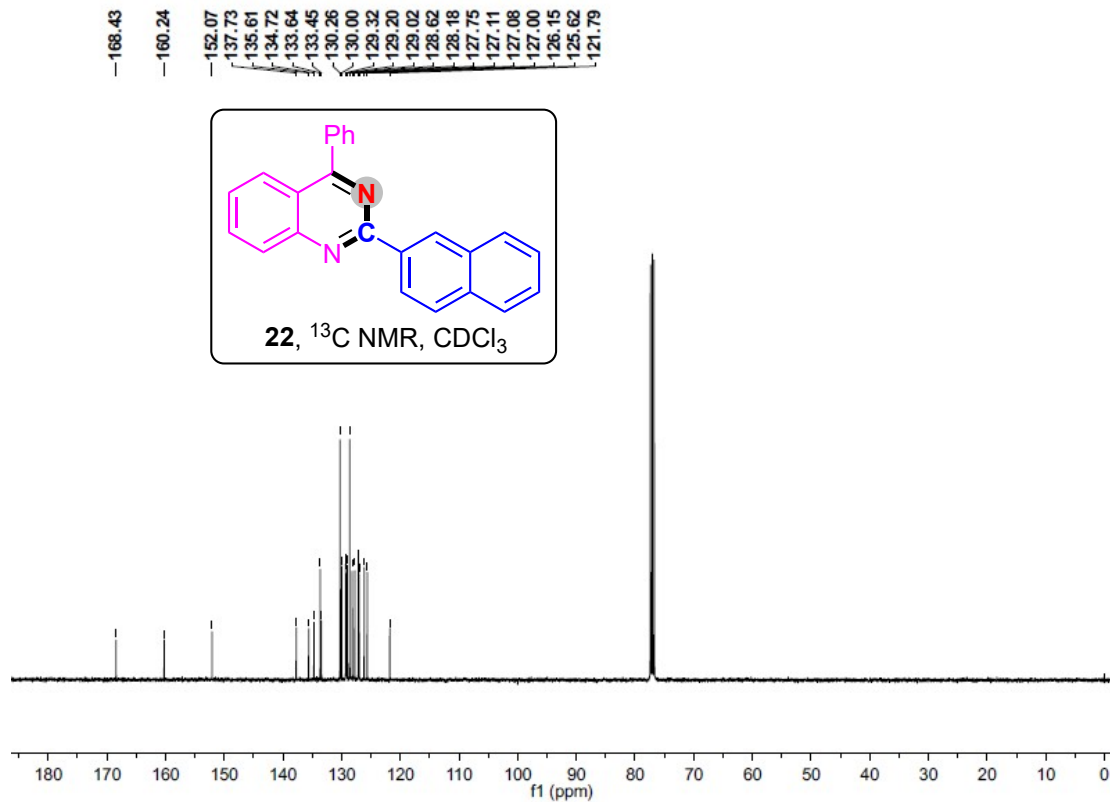

Quinazolin-4(3H)-one (23)

# <sup>1</sup>H NMR

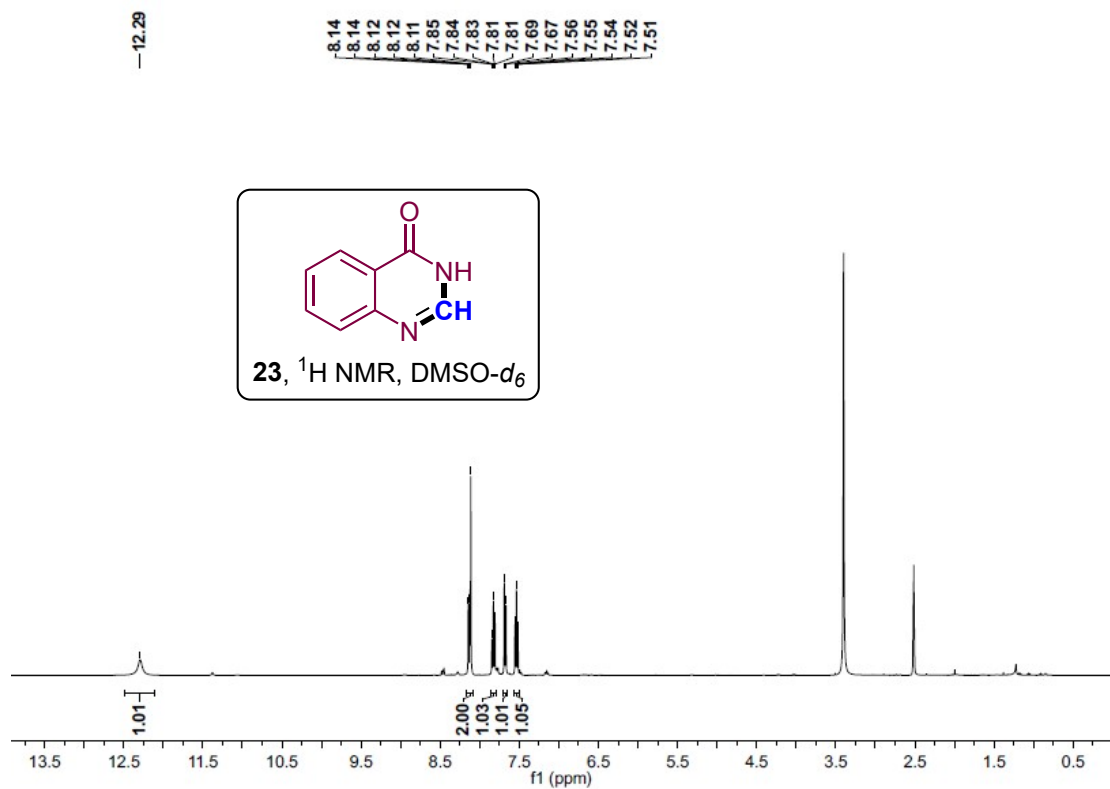

# <sup>13</sup>C NMR

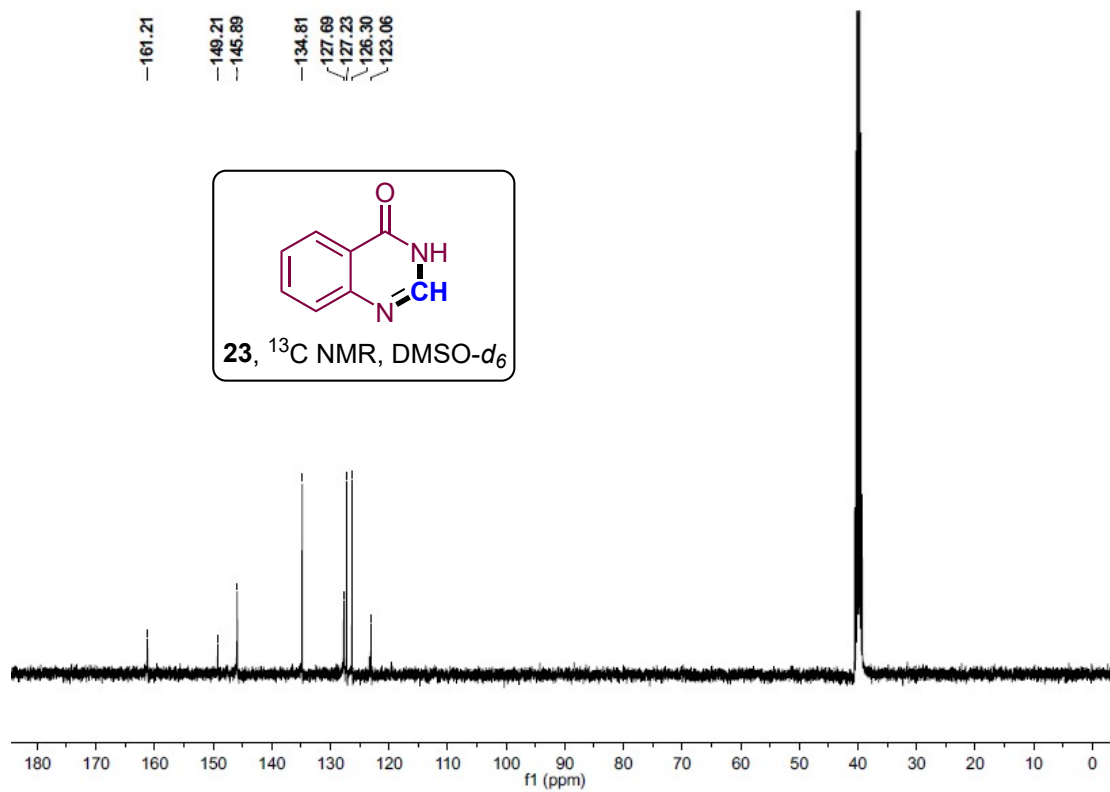

3-Methylquinazolin-4(3H)-one (24)

### <sup>1</sup>H NMR

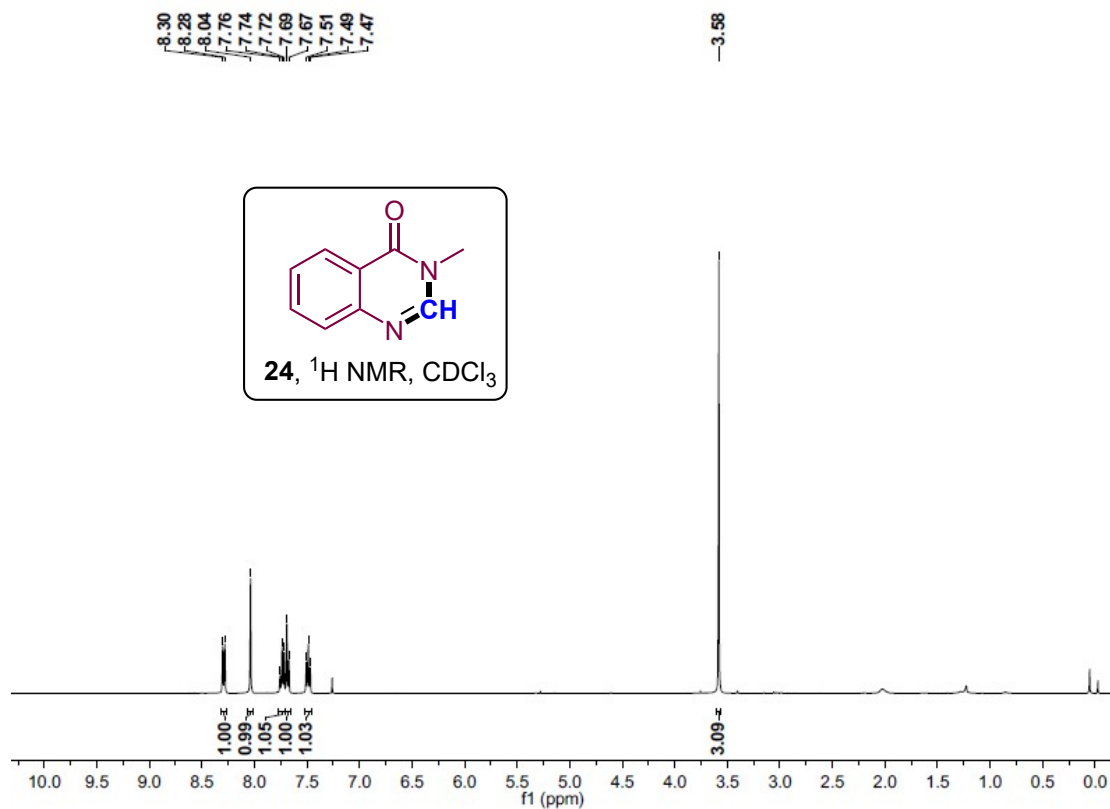

### <sup>13</sup>C NMR

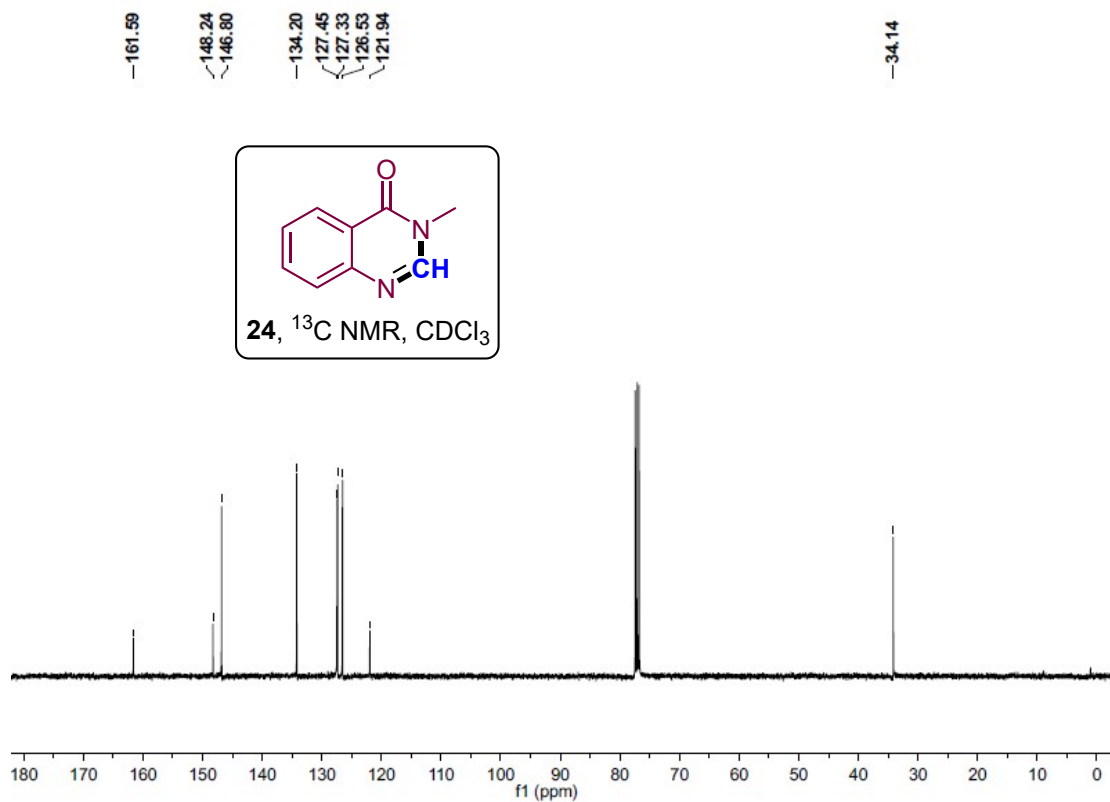

### 3-Butylquinazolin-4(3H)-one (25)

# <sup>1</sup>H NMR

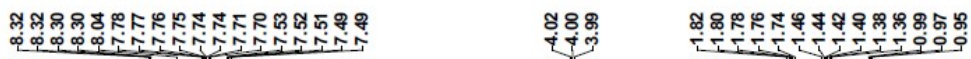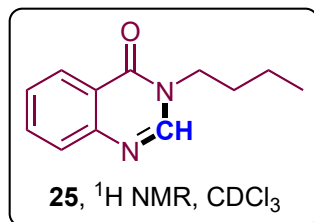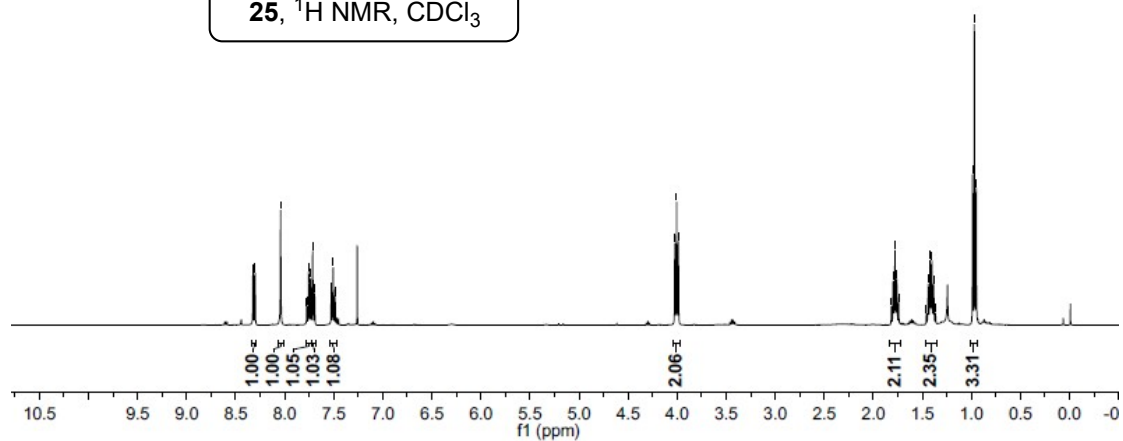

# <sup>13</sup>C NMR

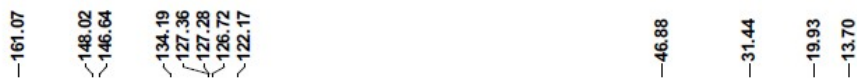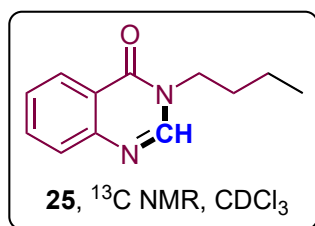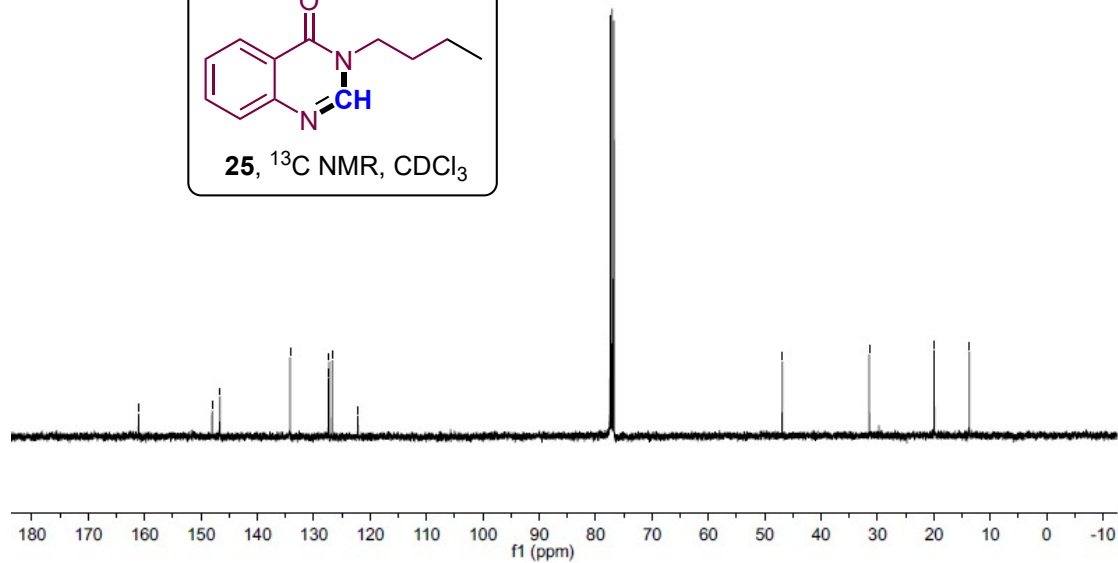

# 3-Allylquinazolin-4(3H)-one (26)

# <sup>1</sup>H NMR

8.32  
8.30  
8.01  
7.78  
7.76  
7.74  
7.71  
7.69  
7.52  
7.50  
7.48  
6.02  
6.01  
5.99  
5.98  
5.96  
5.95  
5.31  
5.28  
5.23  
4.64  
4.62

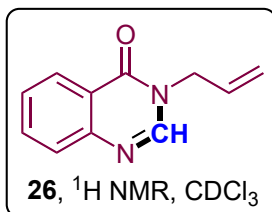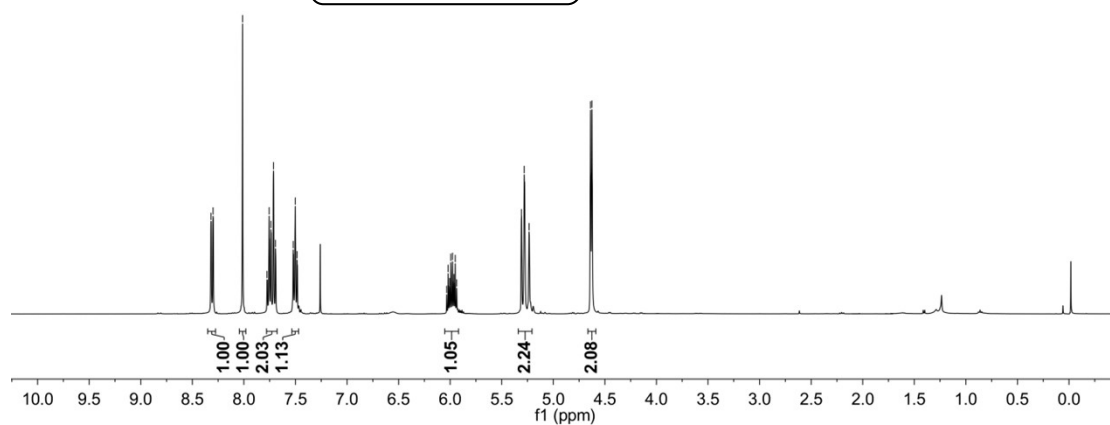

# <sup>13</sup>C NMR

160.85  
148.07  
146.24  
134.33  
131.84  
127.50  
127.38  
126.81  
122.09  
118.90  
48.37

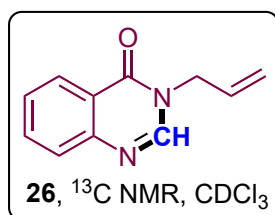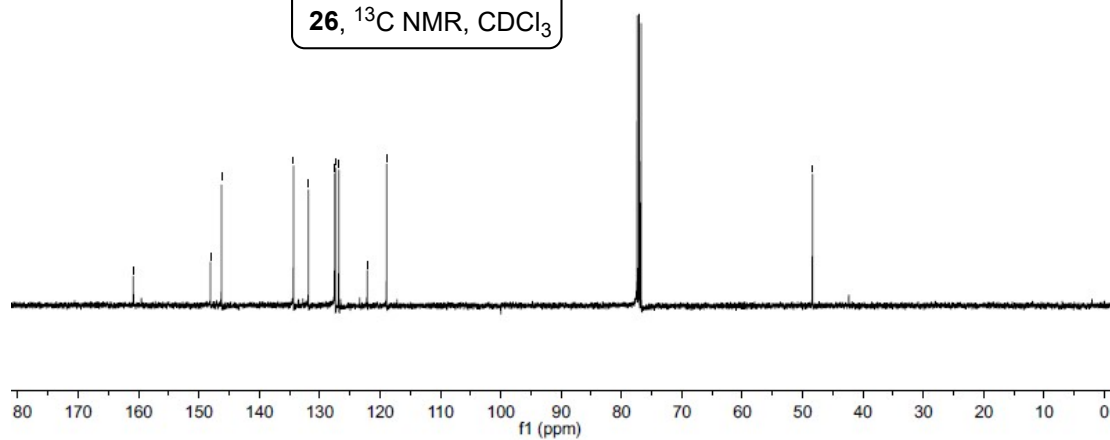

# 3-Cyclopropylquinazolin-4(3H)-one (27)





### <sup>1</sup>H NMR

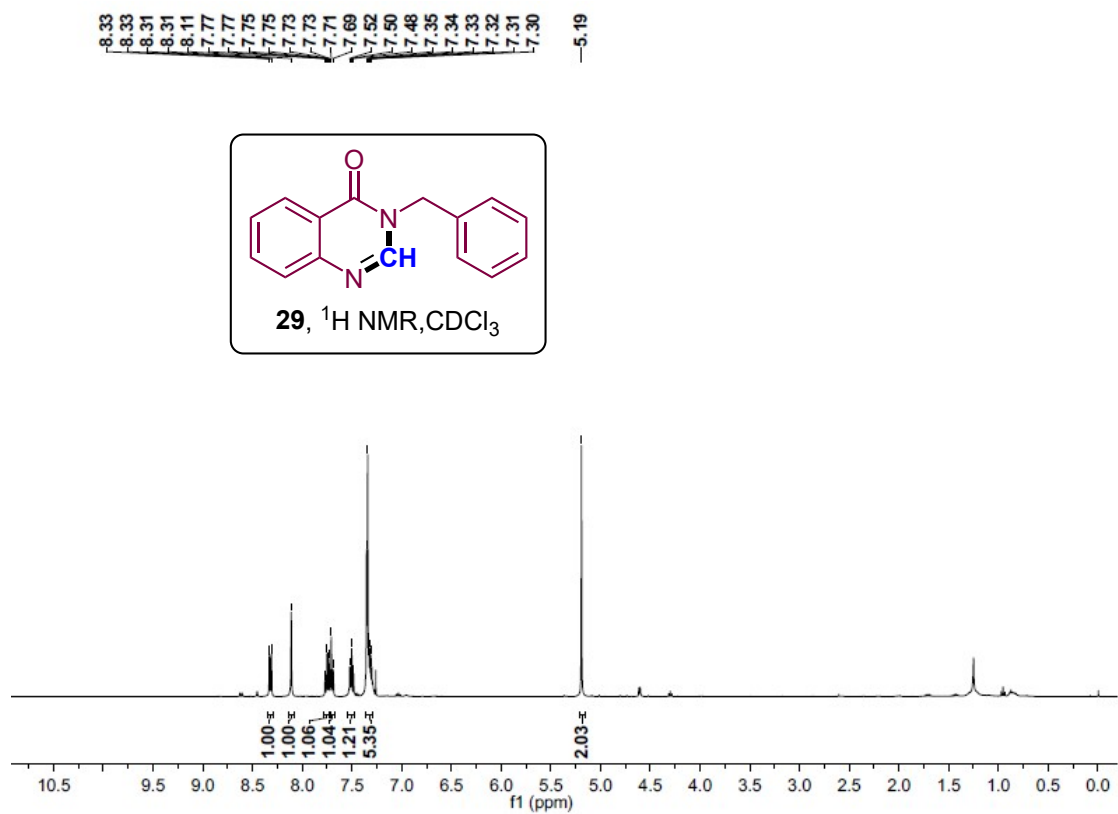

### <sup>13</sup>C NMR

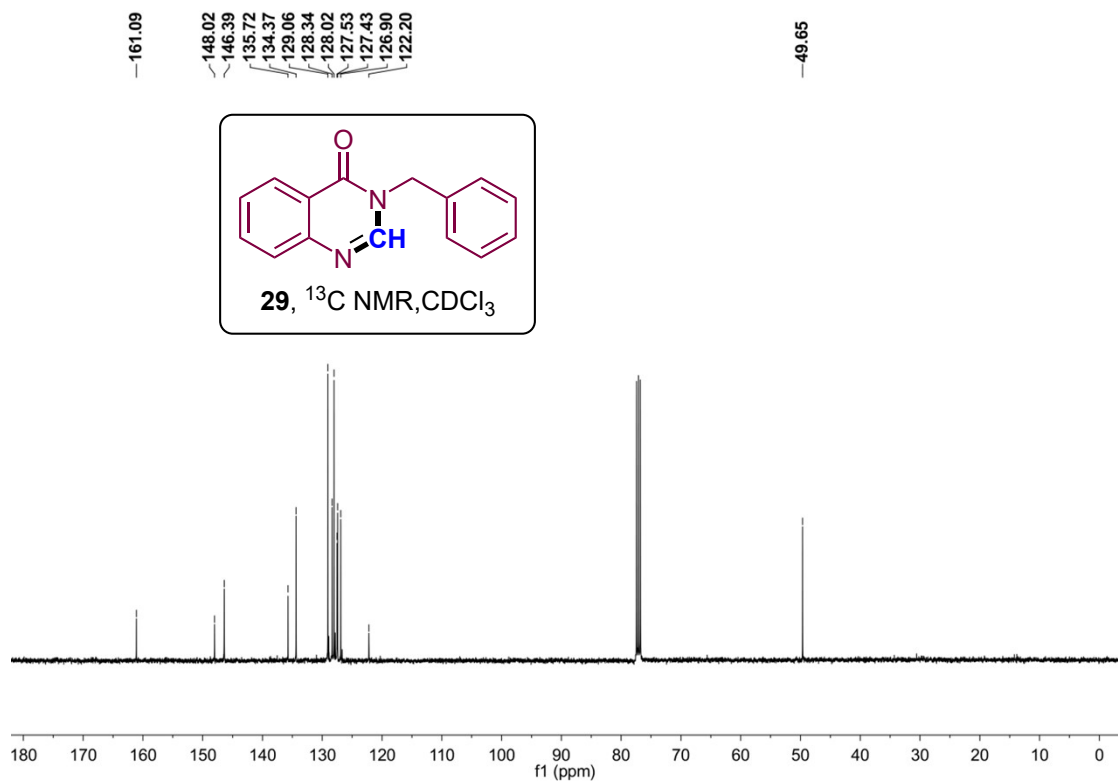

3-(Furan-2-ylmethyl)quinazolin-4(3H)-one (30)



### <sup>1</sup>H NMR

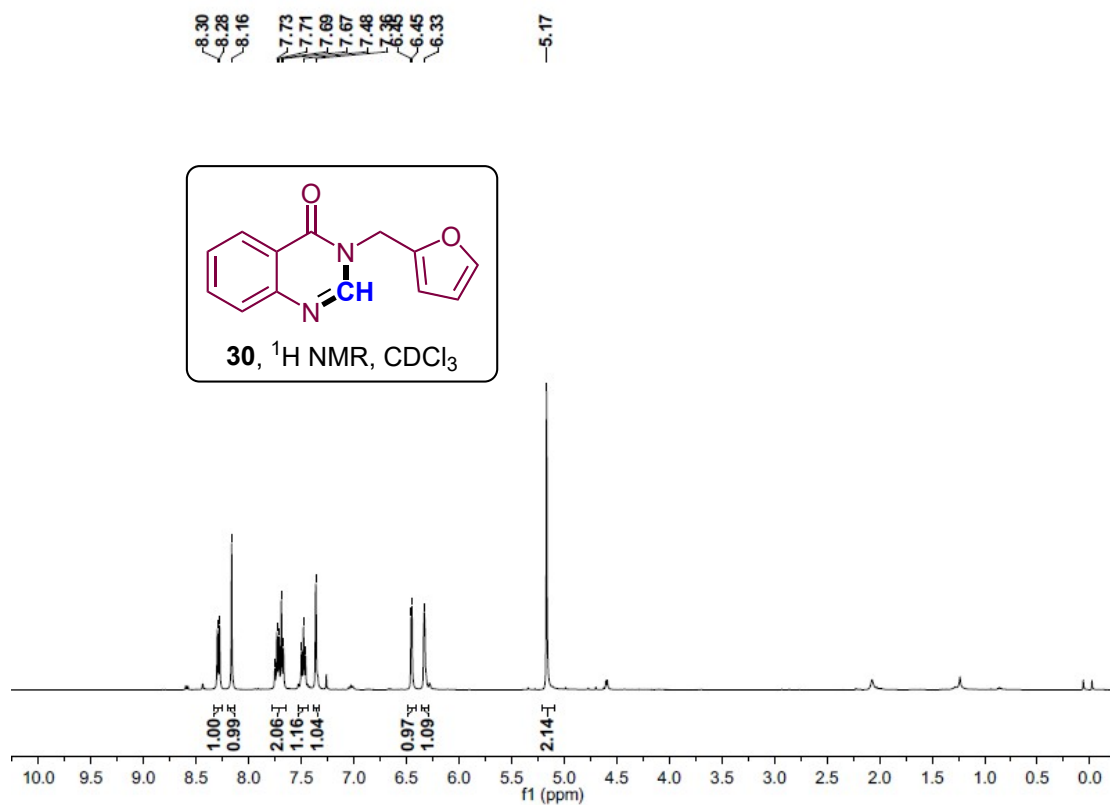

### <sup>13</sup>C NMR

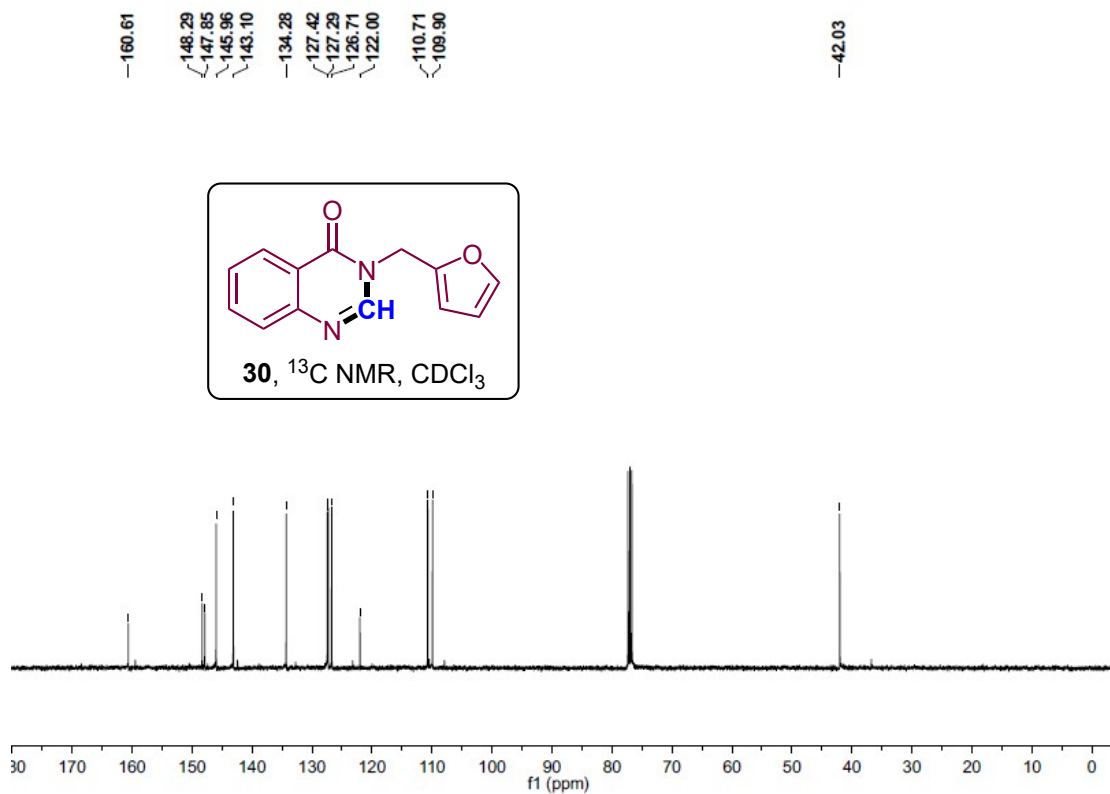

3-(Thiophen-2-ylmethyl)quinazolin-4(3H)-one (31)

# <sup>1</sup>H NMR

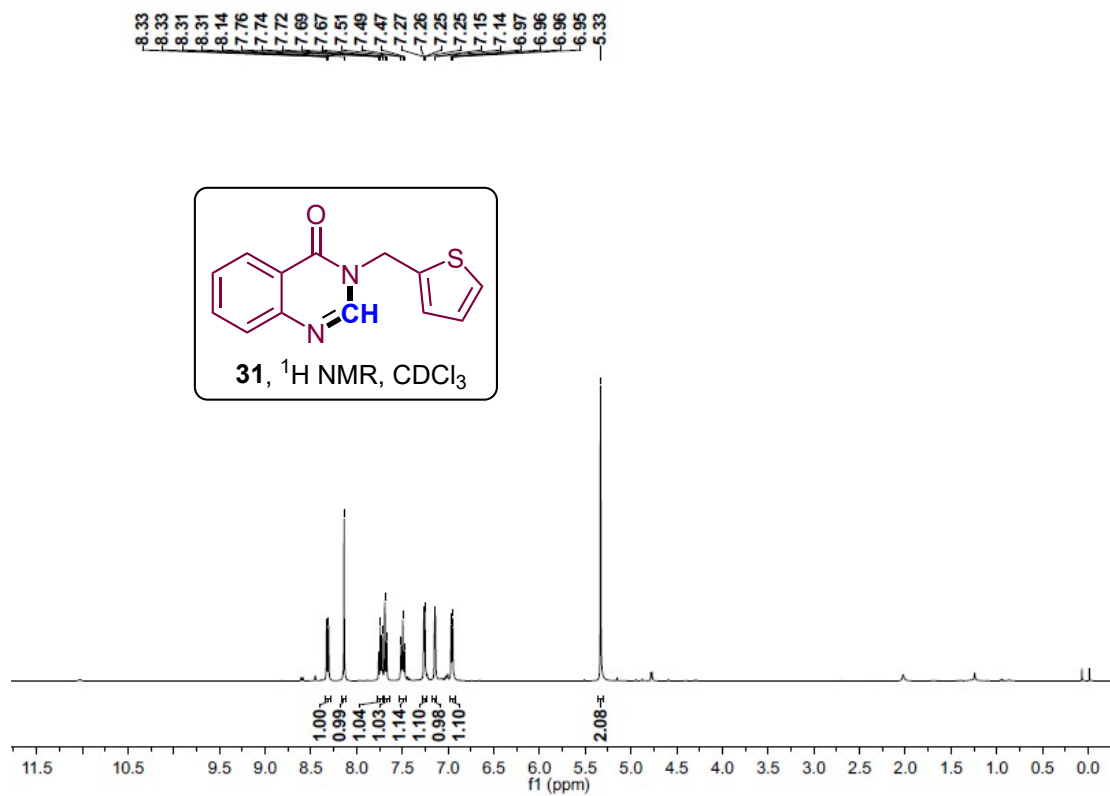

# <sup>13</sup>C NMR

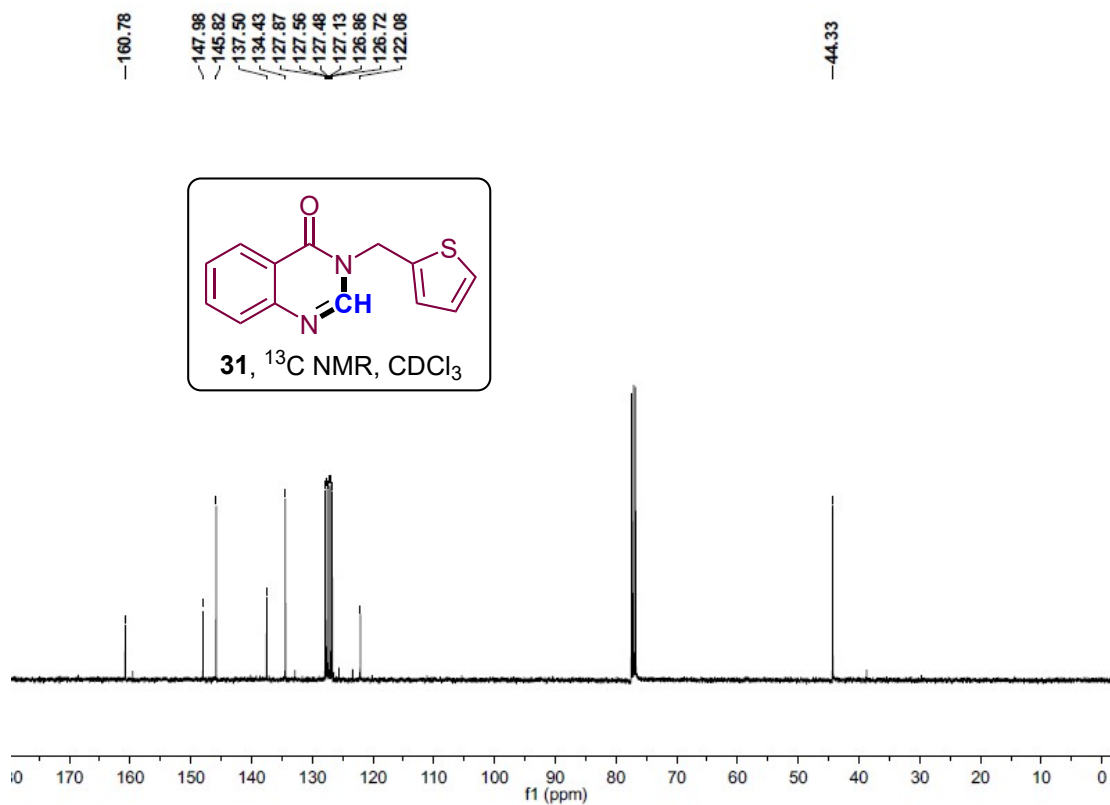

3-(2-(1*H*-Indol-3-yl)ethyl)quinazolin-4(3*H*)-one (**32**)



### <sup>1</sup>H NMR

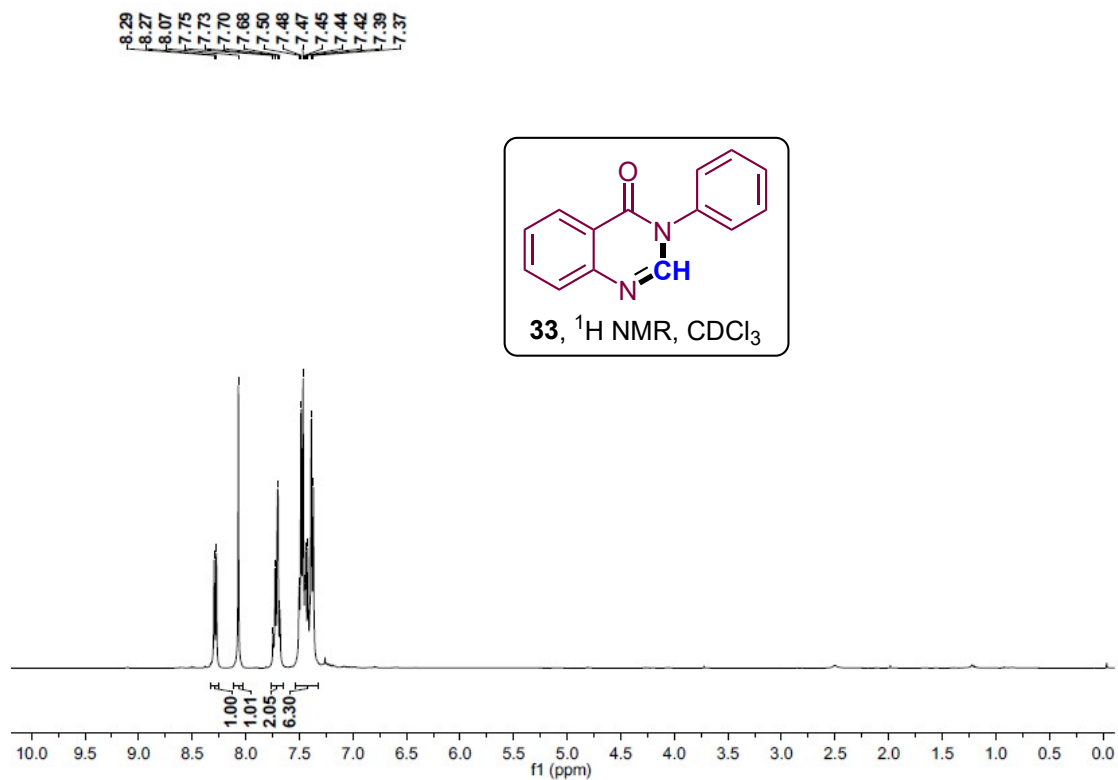

### <sup>13</sup>C NMR

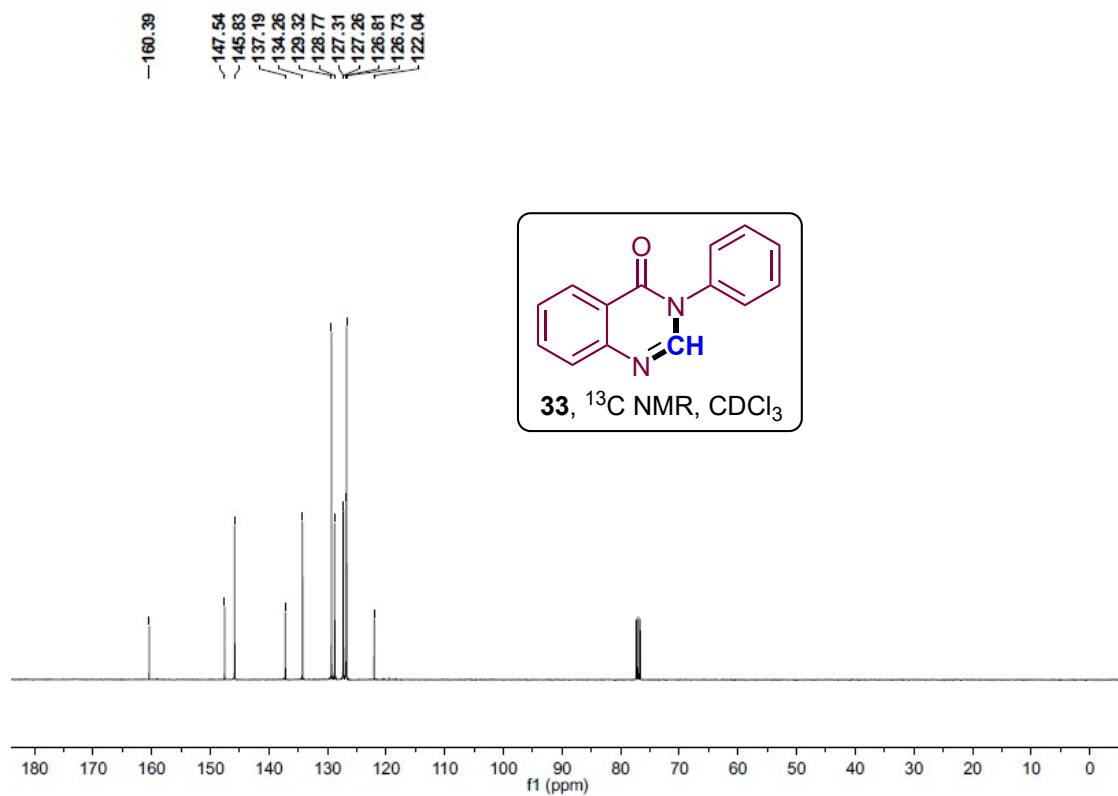

3-(*p*-Tolyl)quinazolin-4(3*H*)-one (**34**)

# <sup>1</sup>H NMR

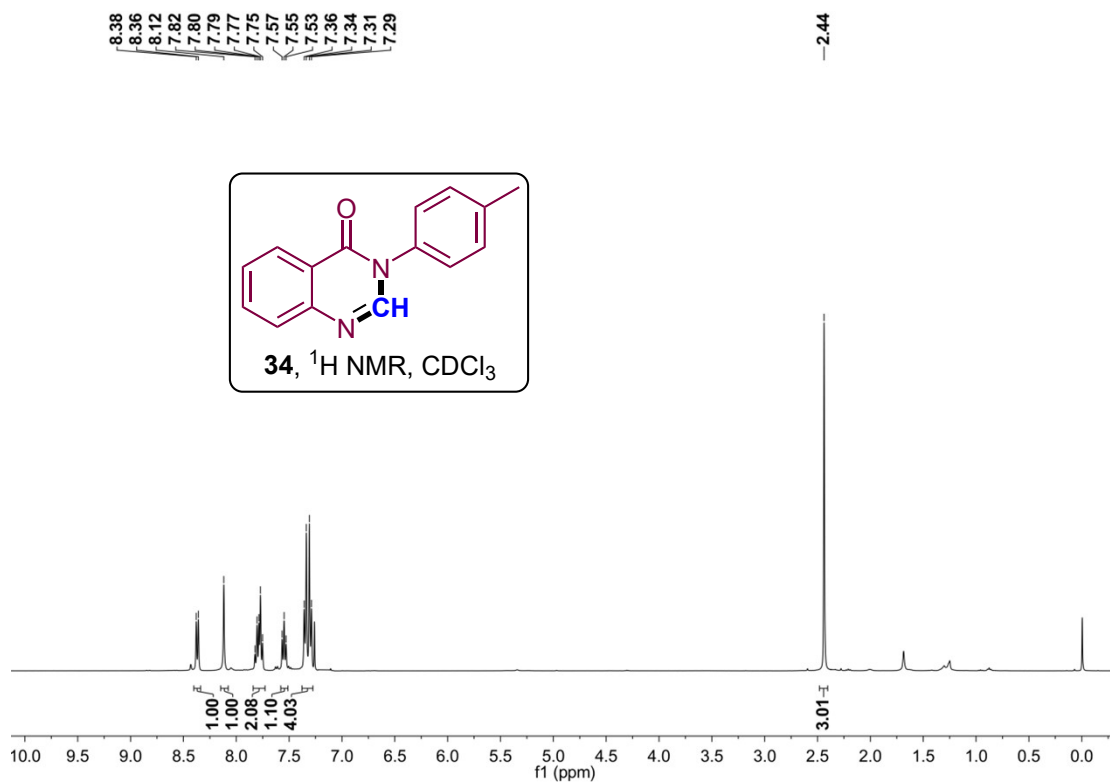

# <sup>13</sup>C NMR

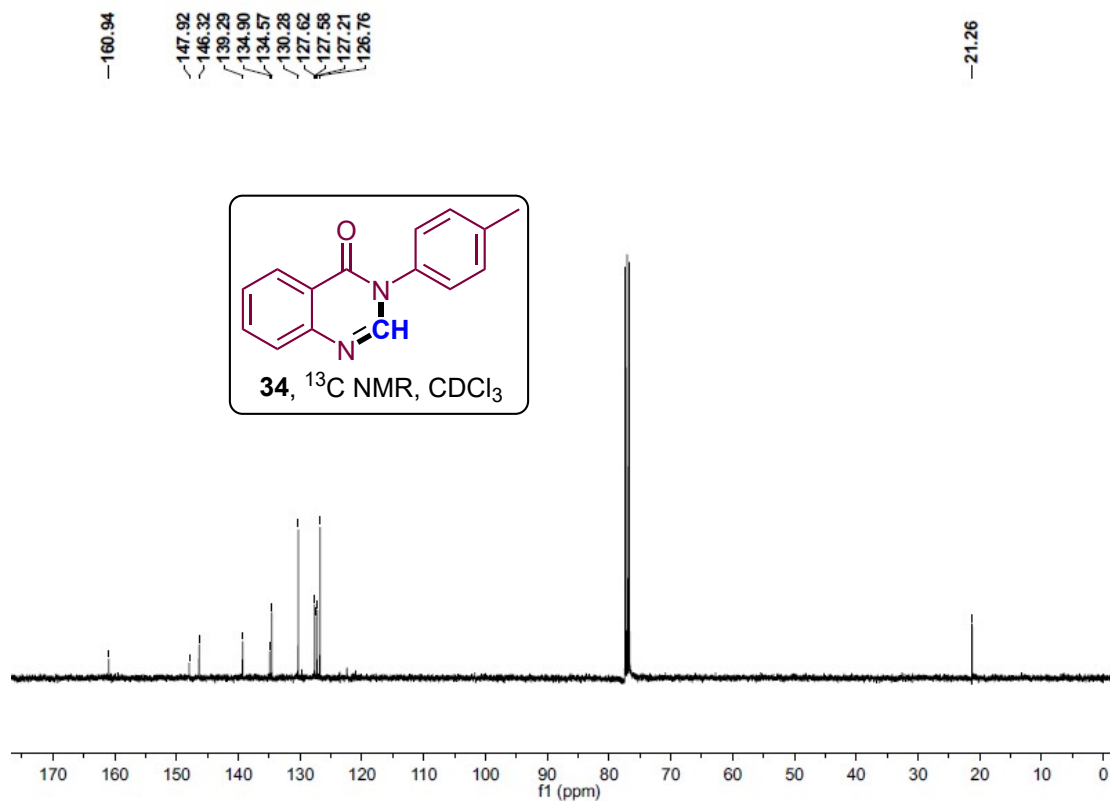

3-(4-Methoxyphenyl)quinazolin-4(3H)-one (35)

### <sup>1</sup>H NMR

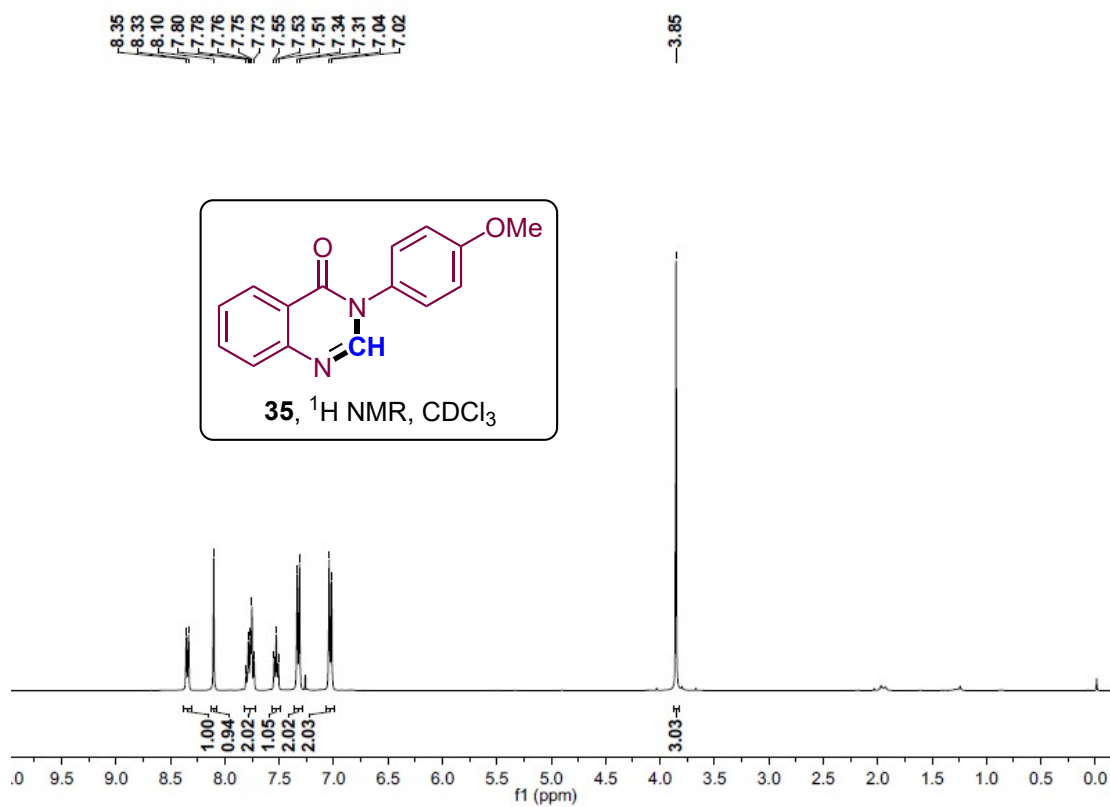

### <sup>13</sup>C NMR

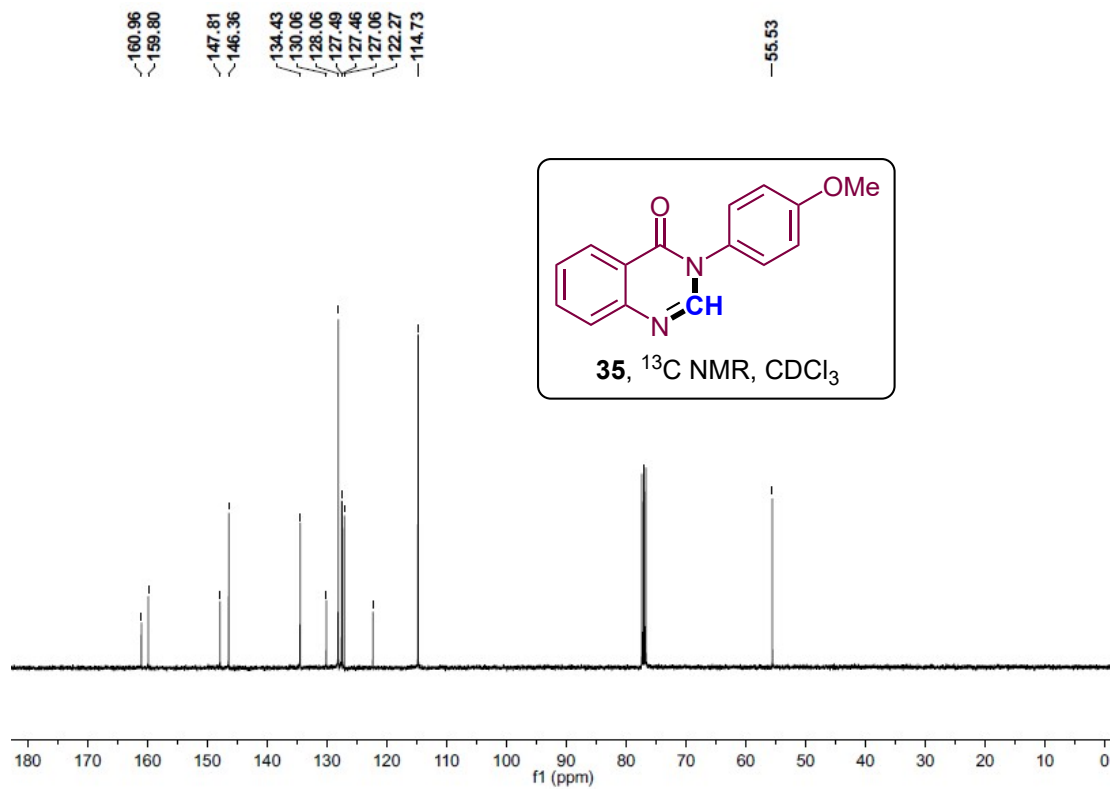

3-(4-Chlorophenyl)quinazolin-4(3H)-one (36)

### <sup>1</sup>H NMR

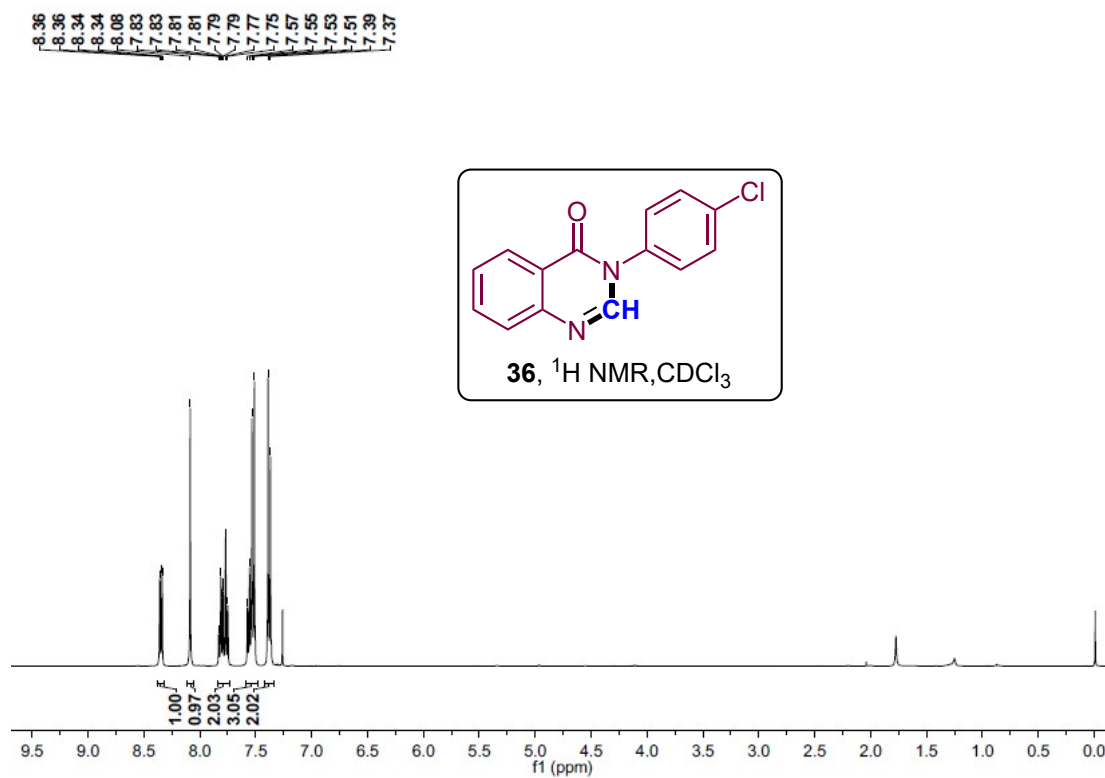

### <sup>13</sup>C NMR

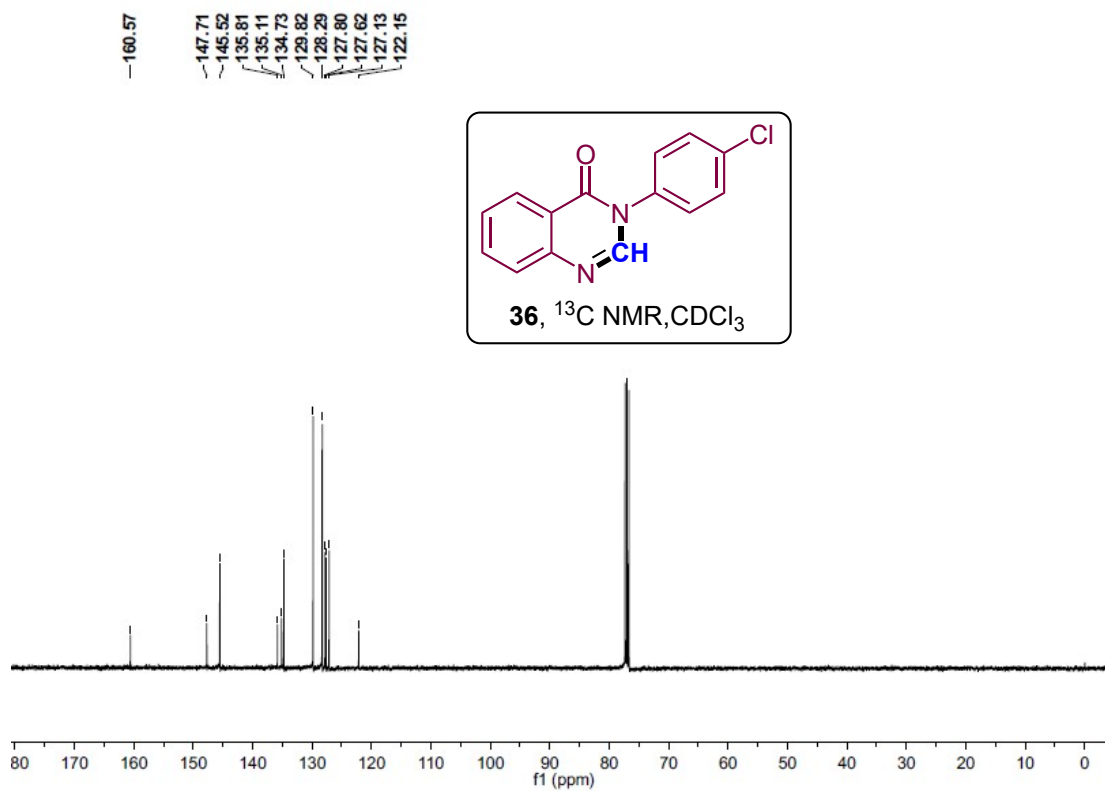

**3-(4-Bromophenyl)quinazolin-4(3H)-one (37)**

### <sup>1</sup>H NMR

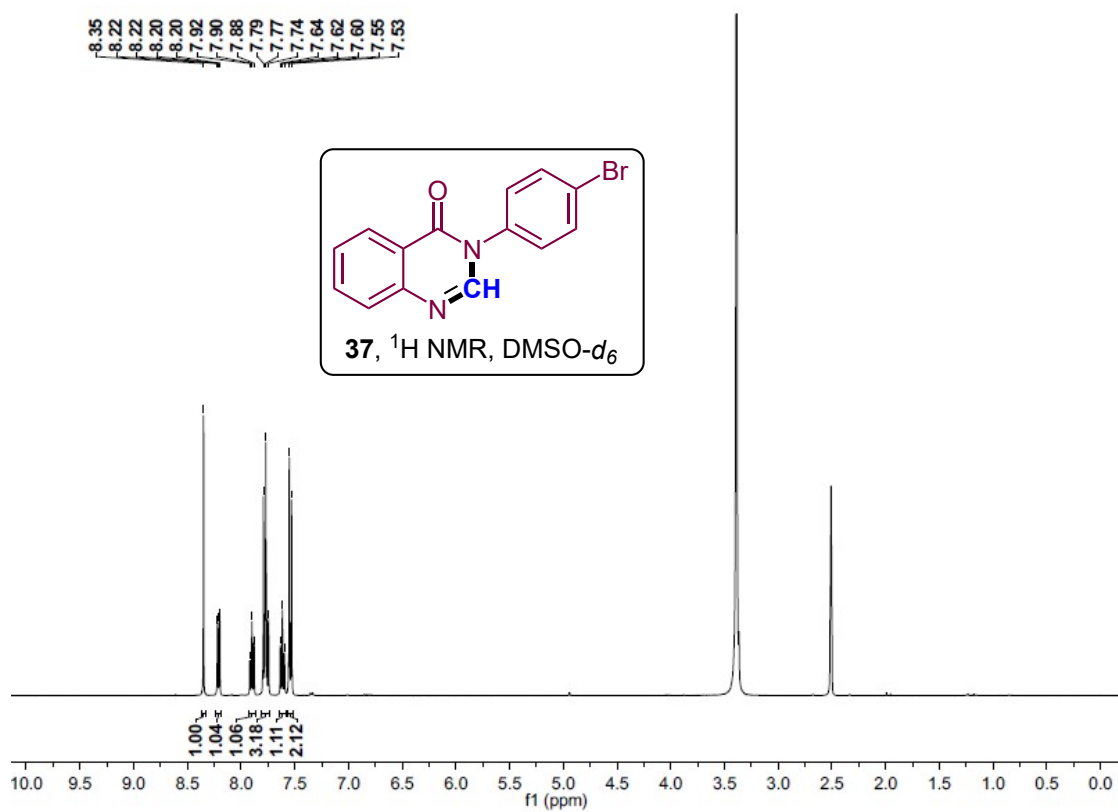

### <sup>13</sup>C NMR

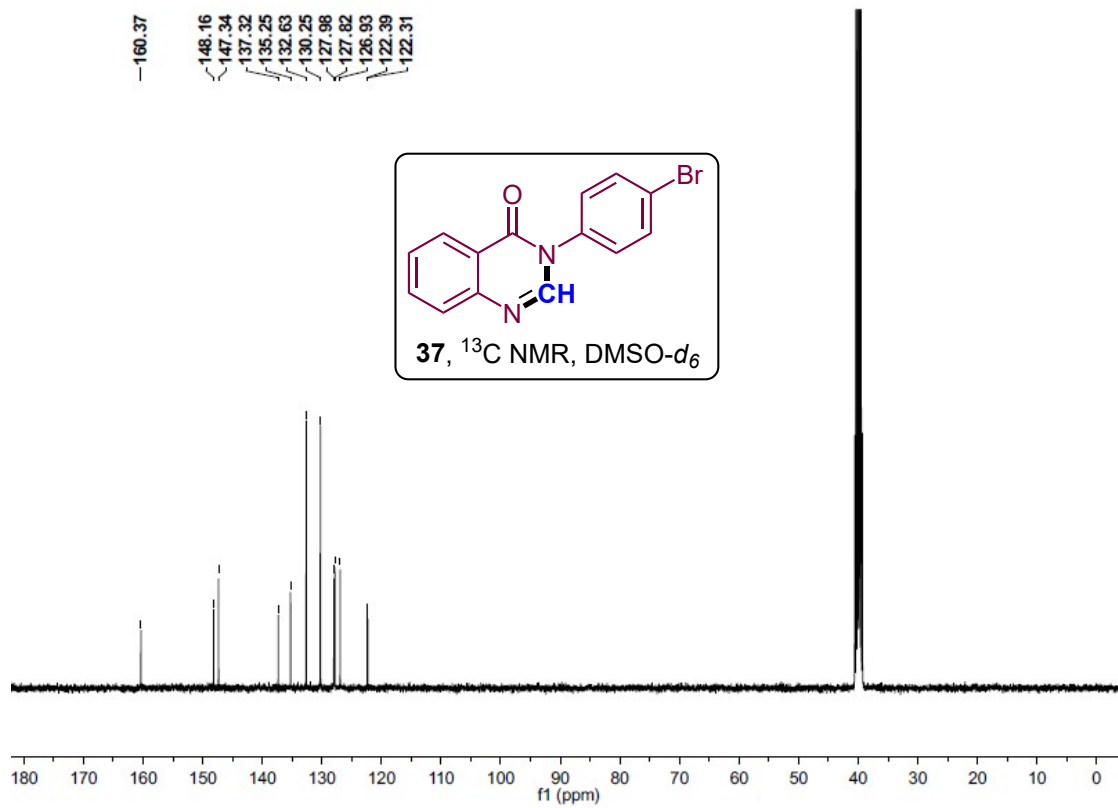

3-(Naphthalen-1-yl)quinazolin-4(3*H*)-one (38)



### <sup>1</sup>H NMR

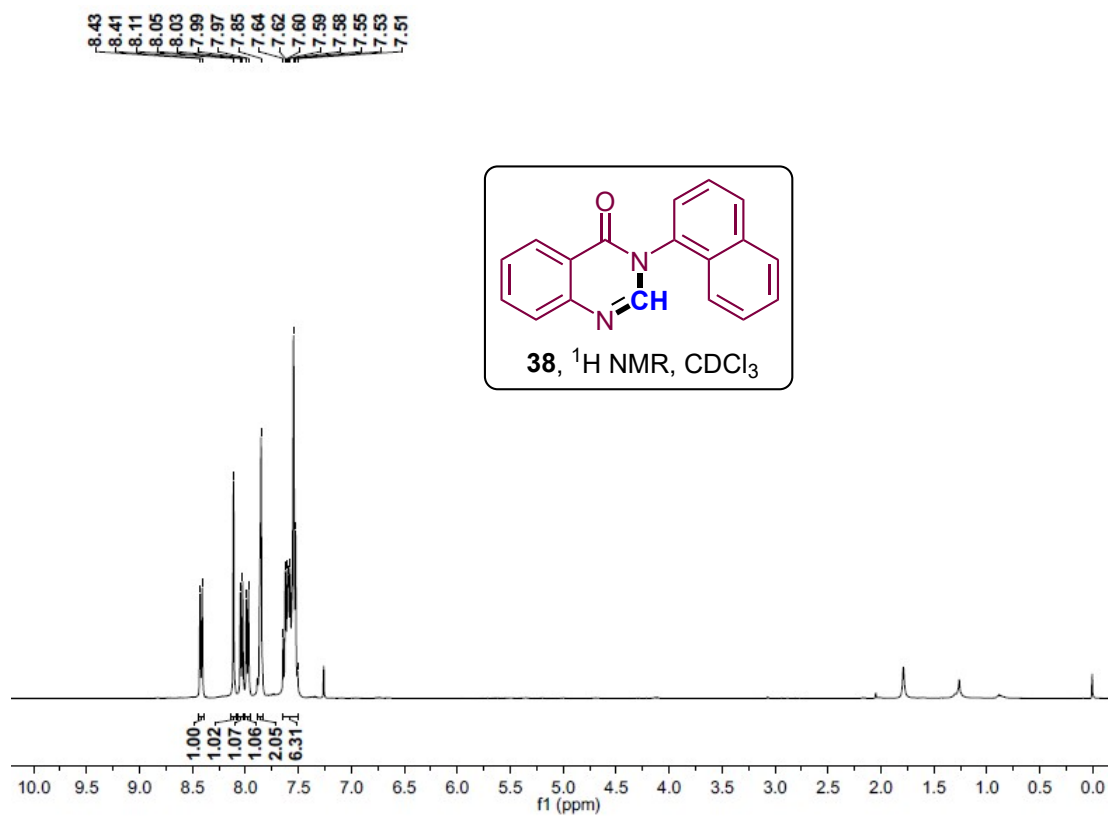

### <sup>13</sup>C NMR

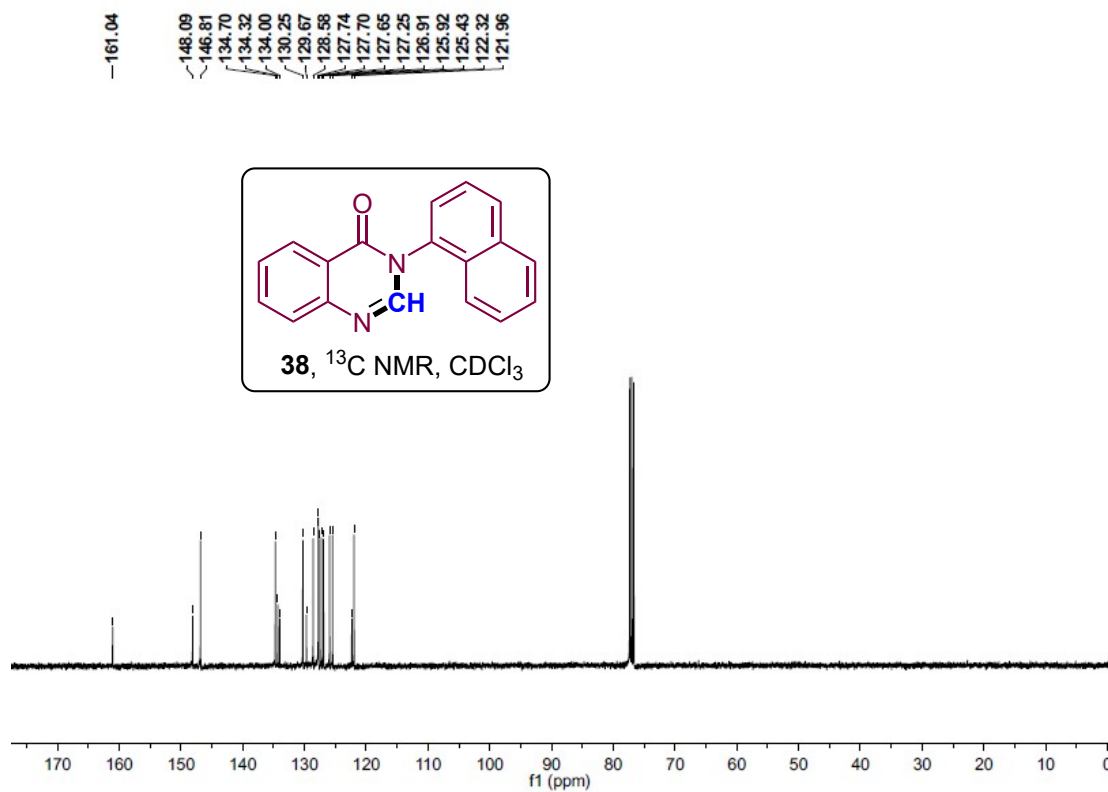

### 2-Phenylquinazolin-4(3H)-one (39)

### <sup>1</sup>H NMR

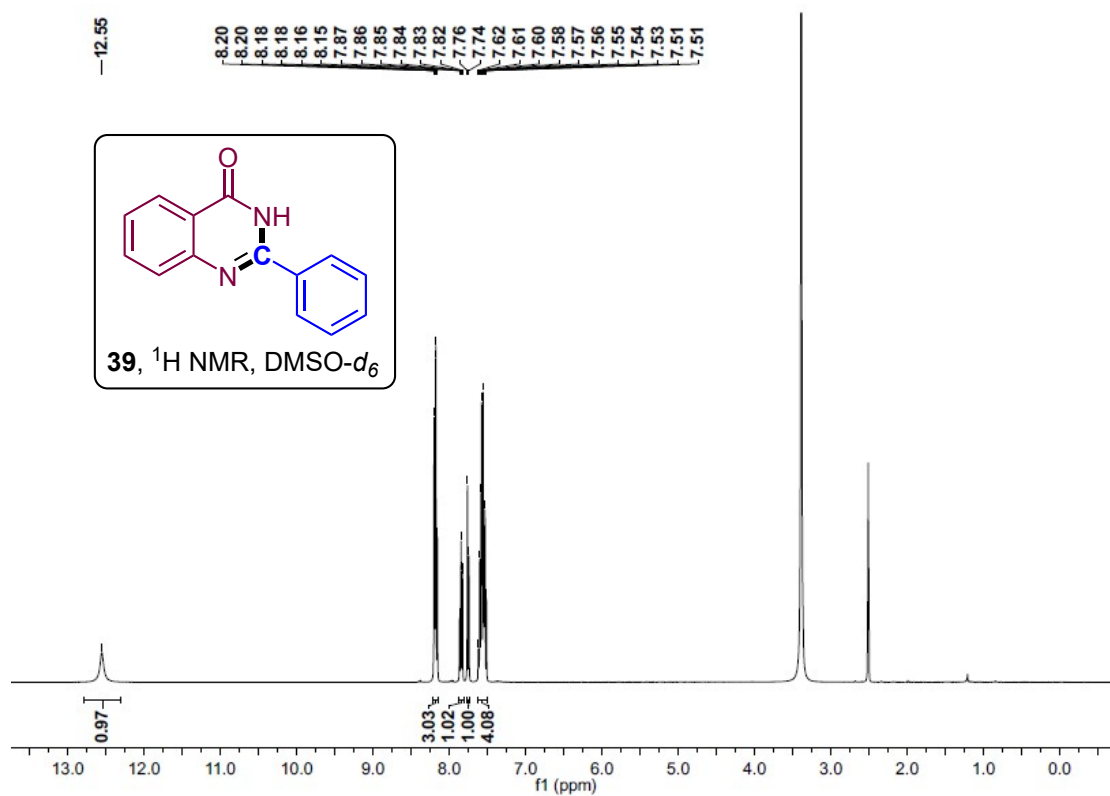

### <sup>13</sup>C NMR

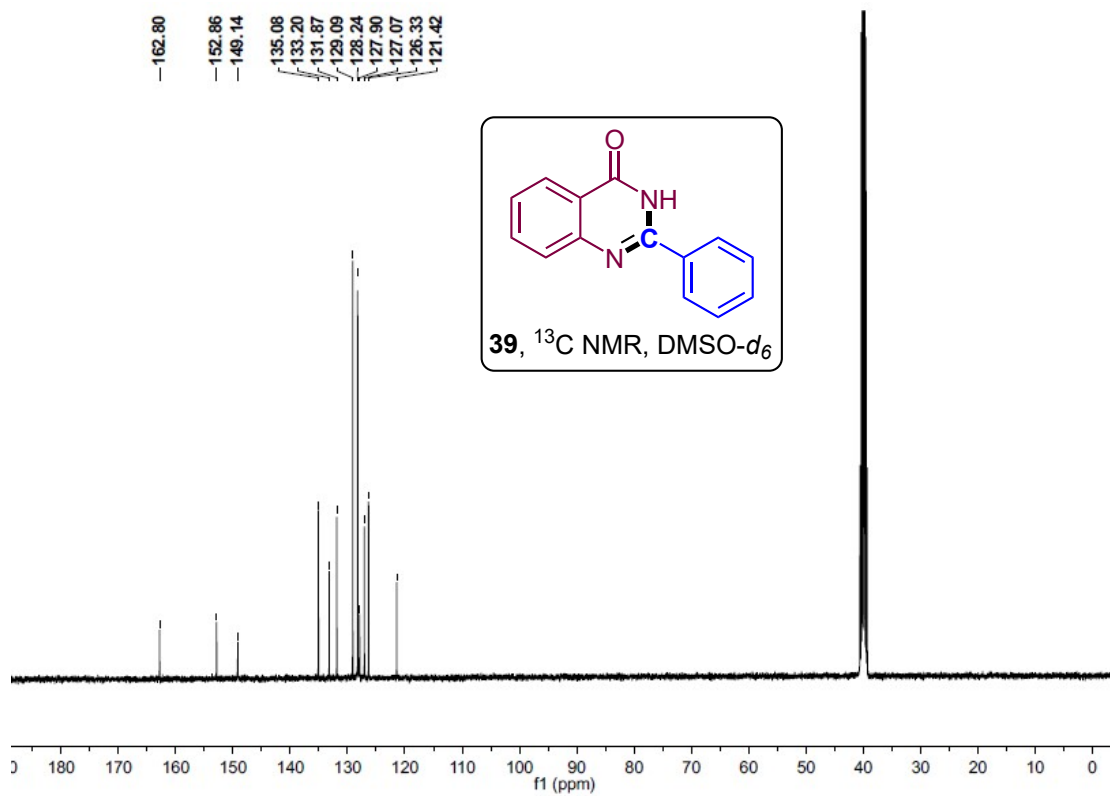

### 2-(*p*-Tolyl)quinazolin-4(3*H*)-one (40)

# <sup>1</sup>H NMR

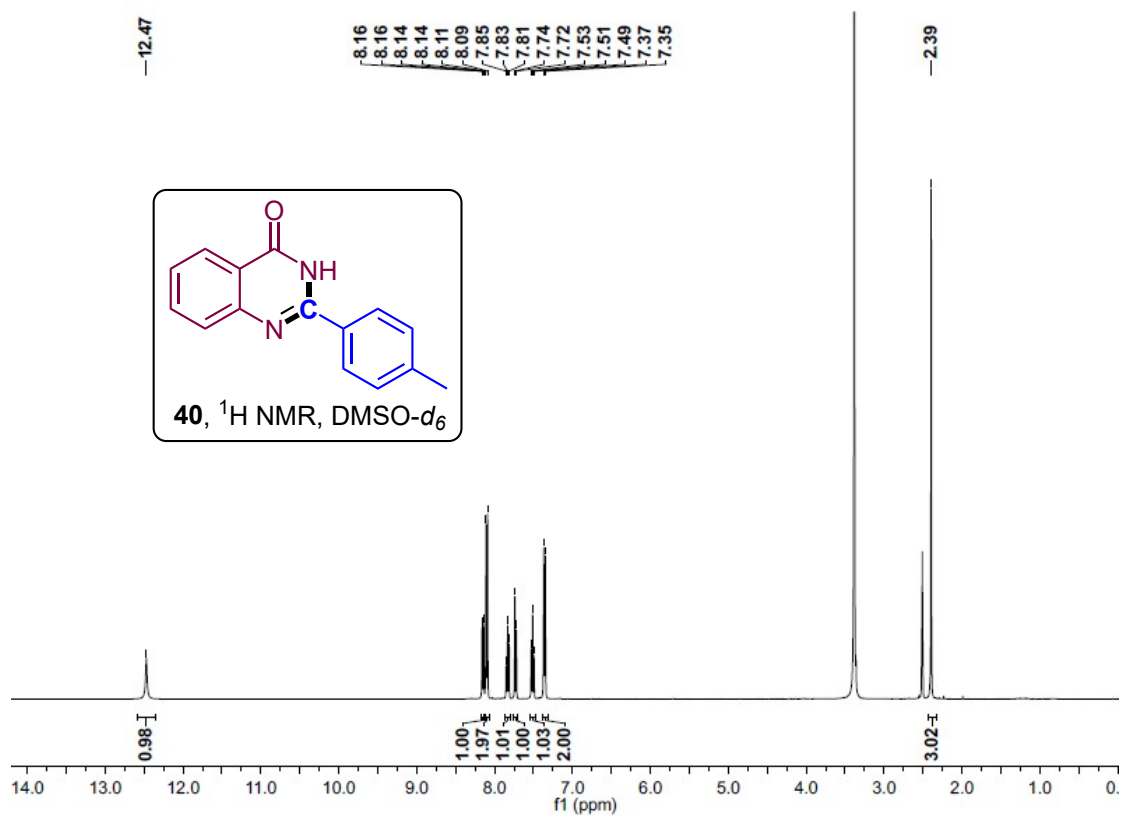

# <sup>13</sup>C NMR

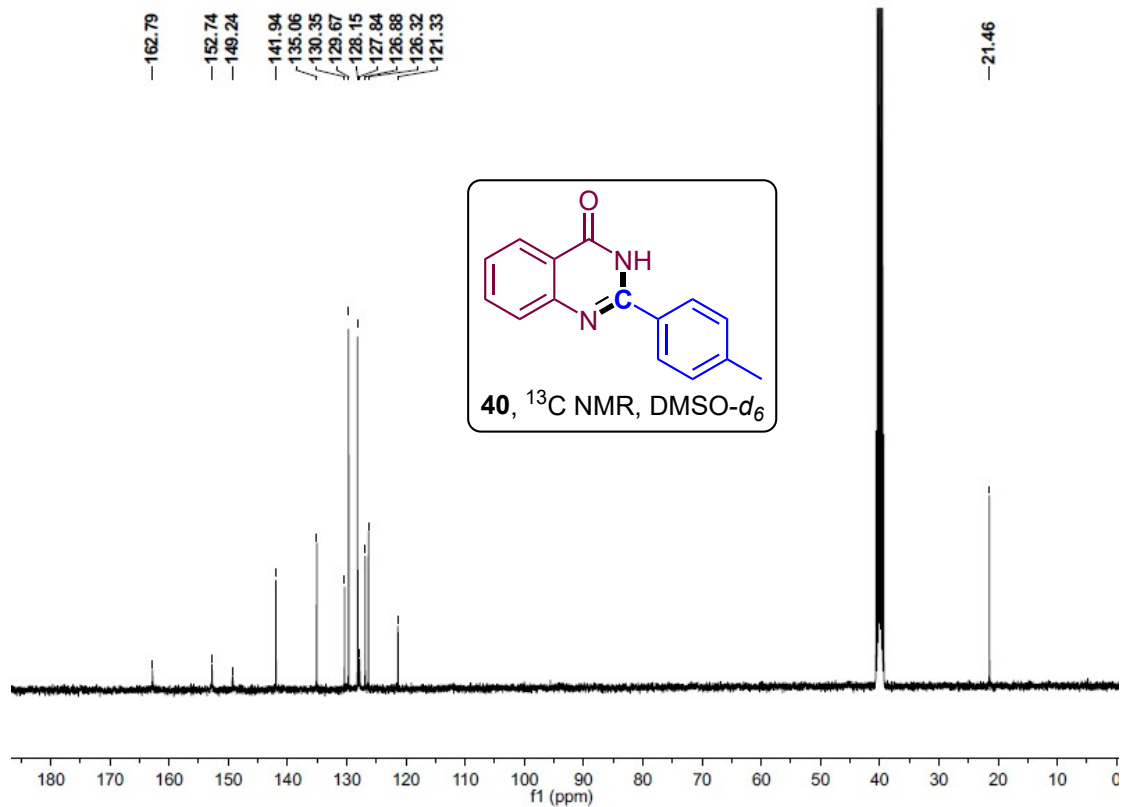

2-(*m*-Tolyl)quinazolin-4(3*H*)-one (41)

# <sup>1</sup>H NMR

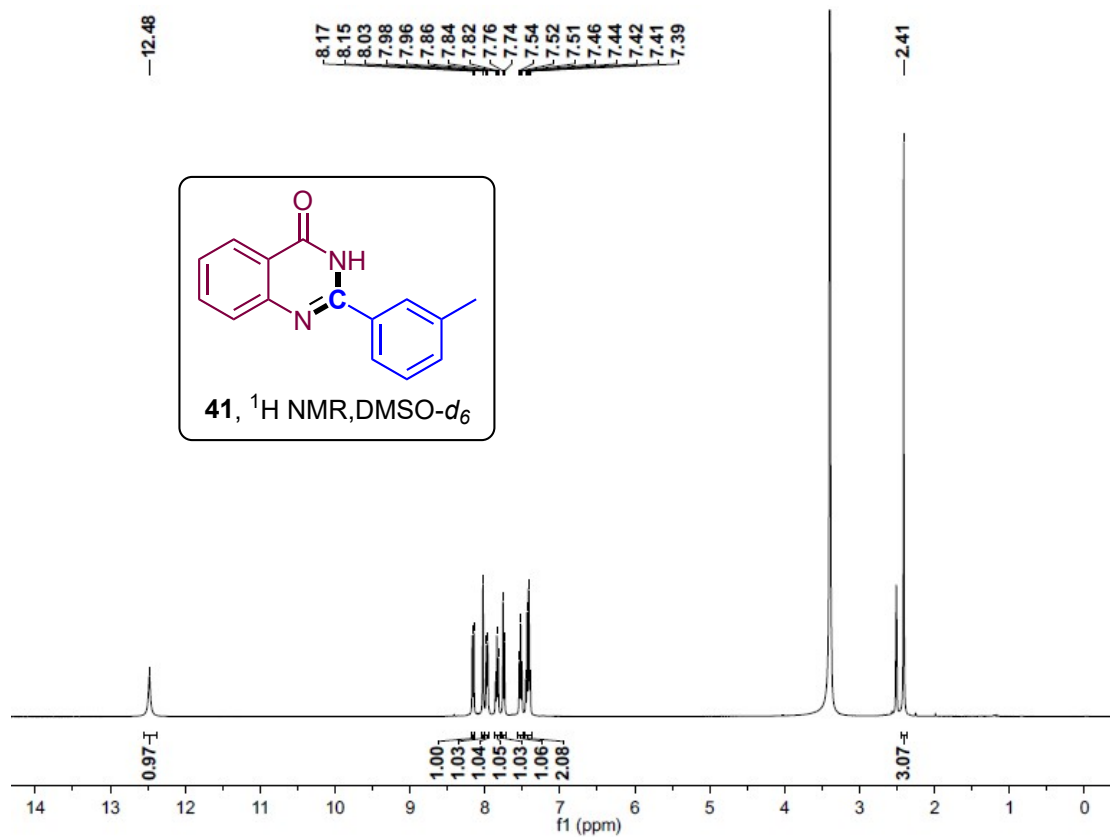

# <sup>13</sup>C NMR

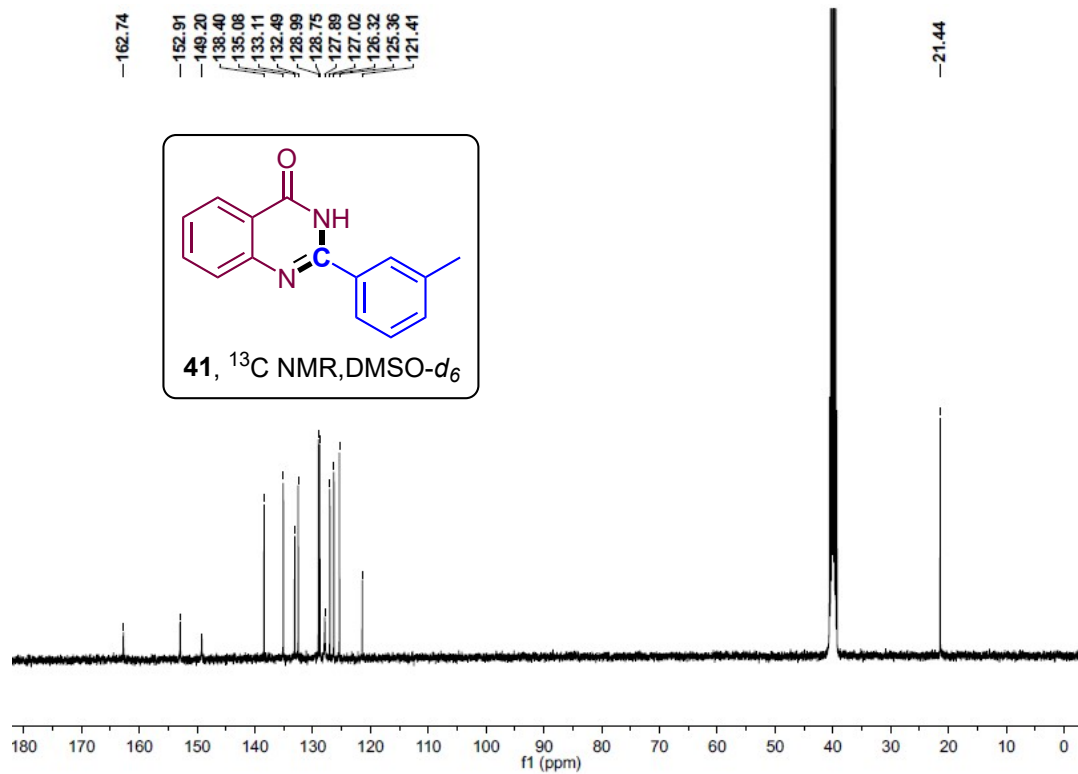

2-(*o*-Tolyl)quinazolin-4(3*H*)-one (42)

### <sup>1</sup>H NMR

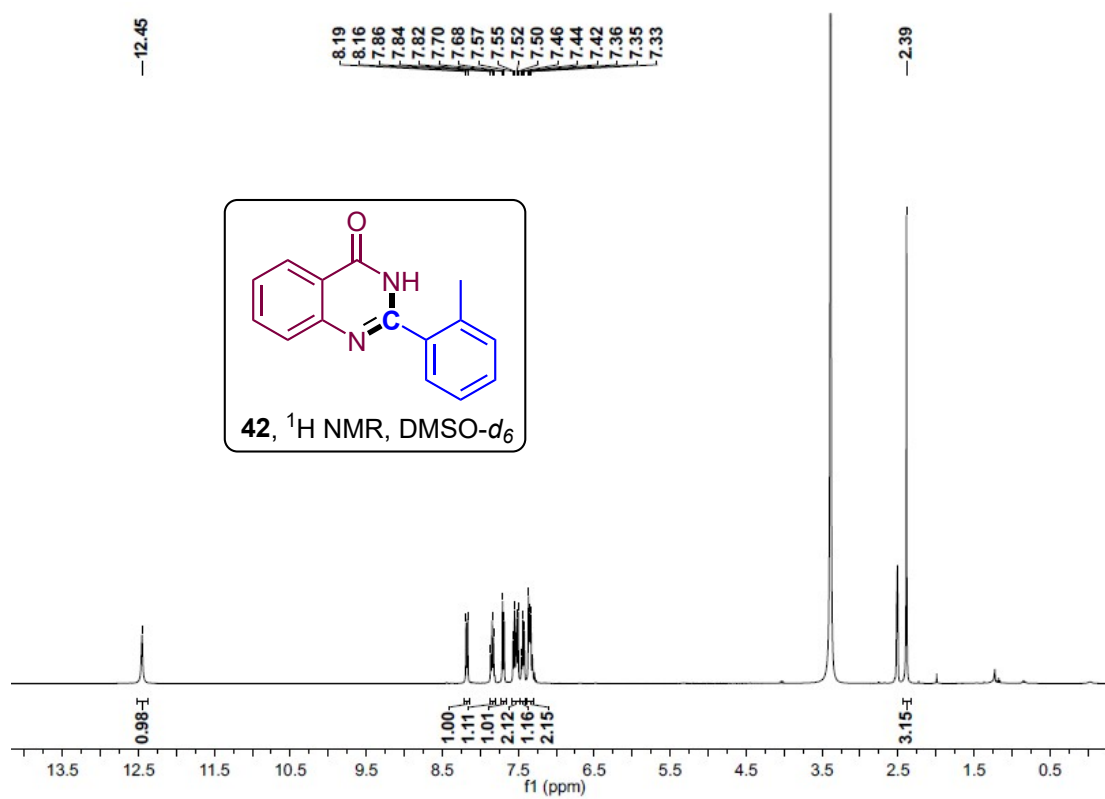

### <sup>13</sup>C NMR

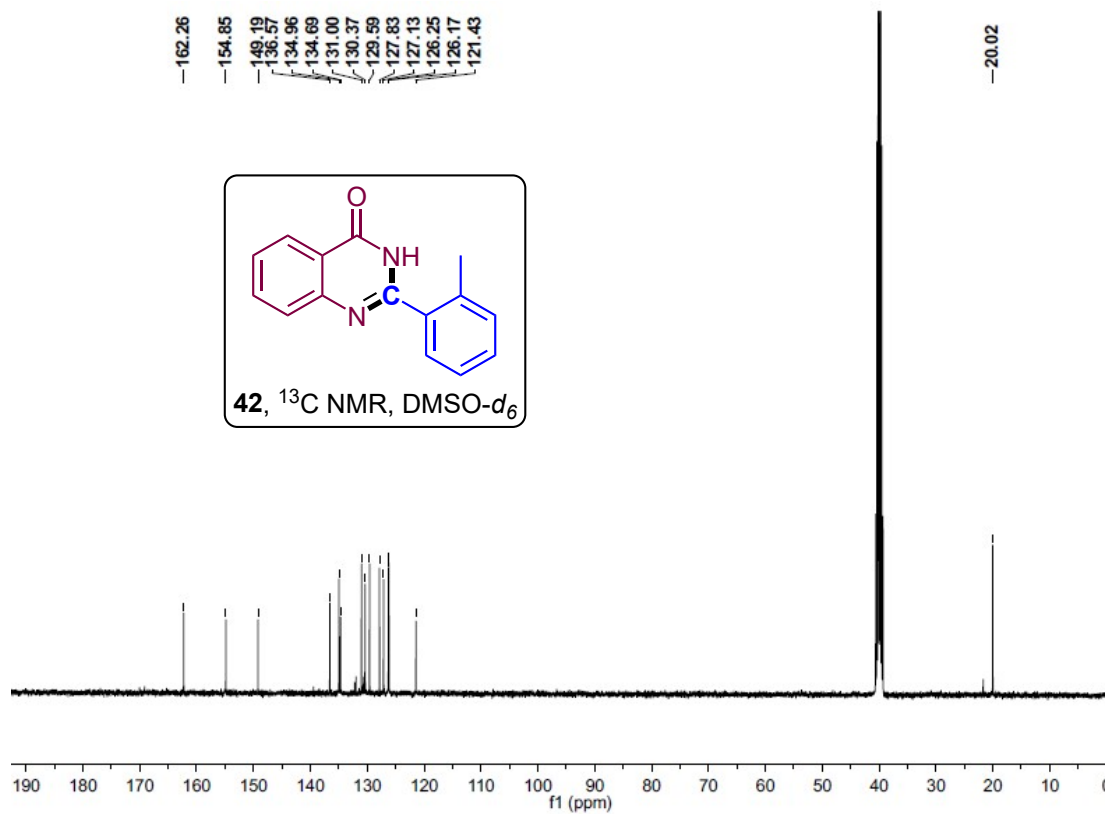

2-(4-Methoxyphenyl)quinazolin-4(3*H*)-one (43)

### <sup>1</sup>H NMR

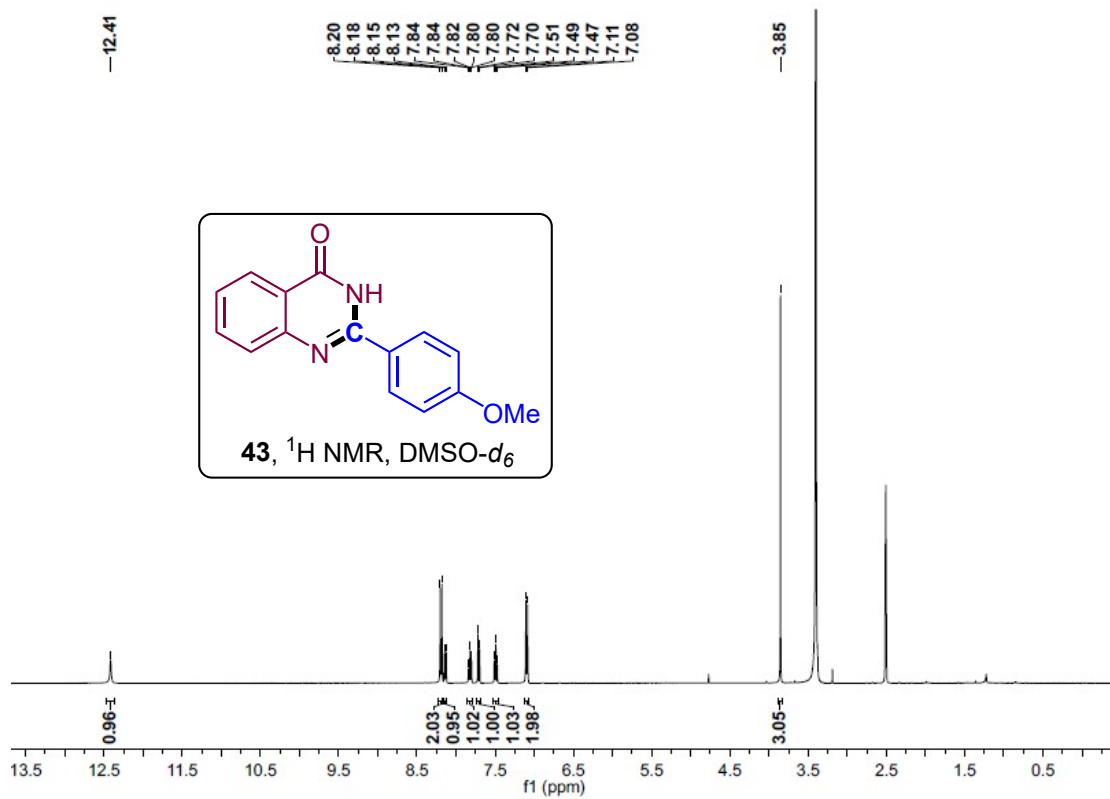

### <sup>13</sup>C NMR

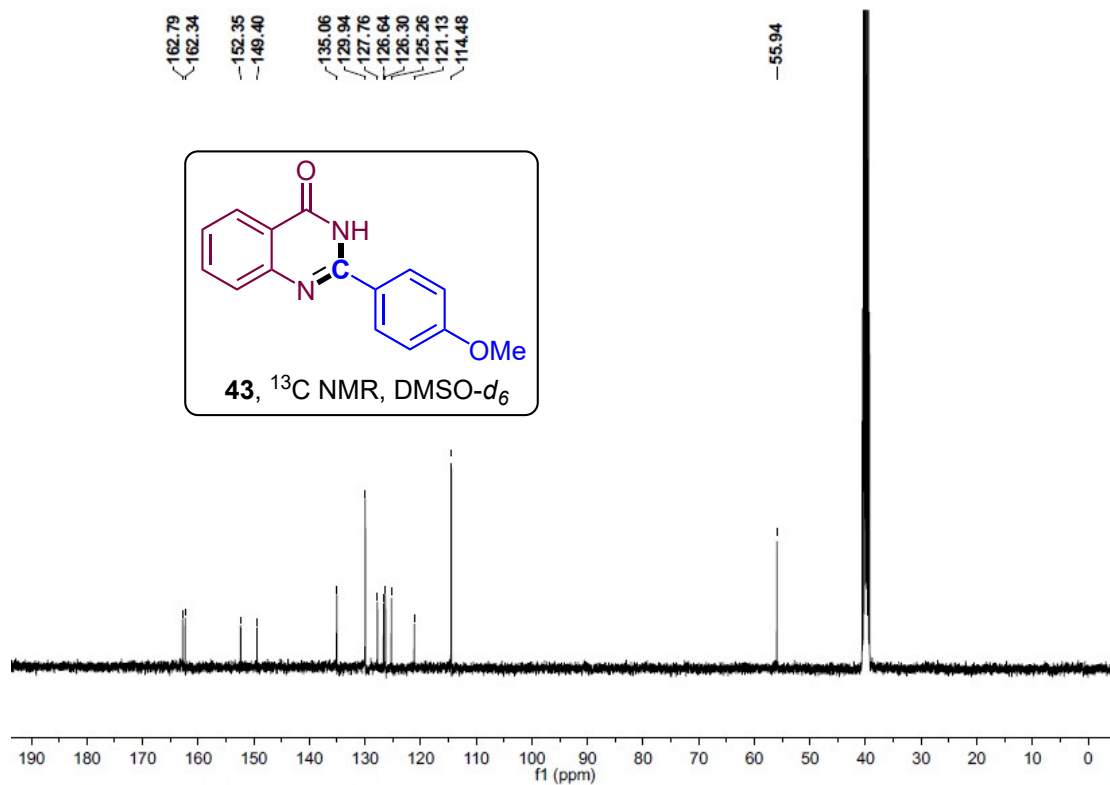

### 2-(4-Fluorophenyl)quinazolin-4(3*H*)-one (44)

### <sup>1</sup>H NMR

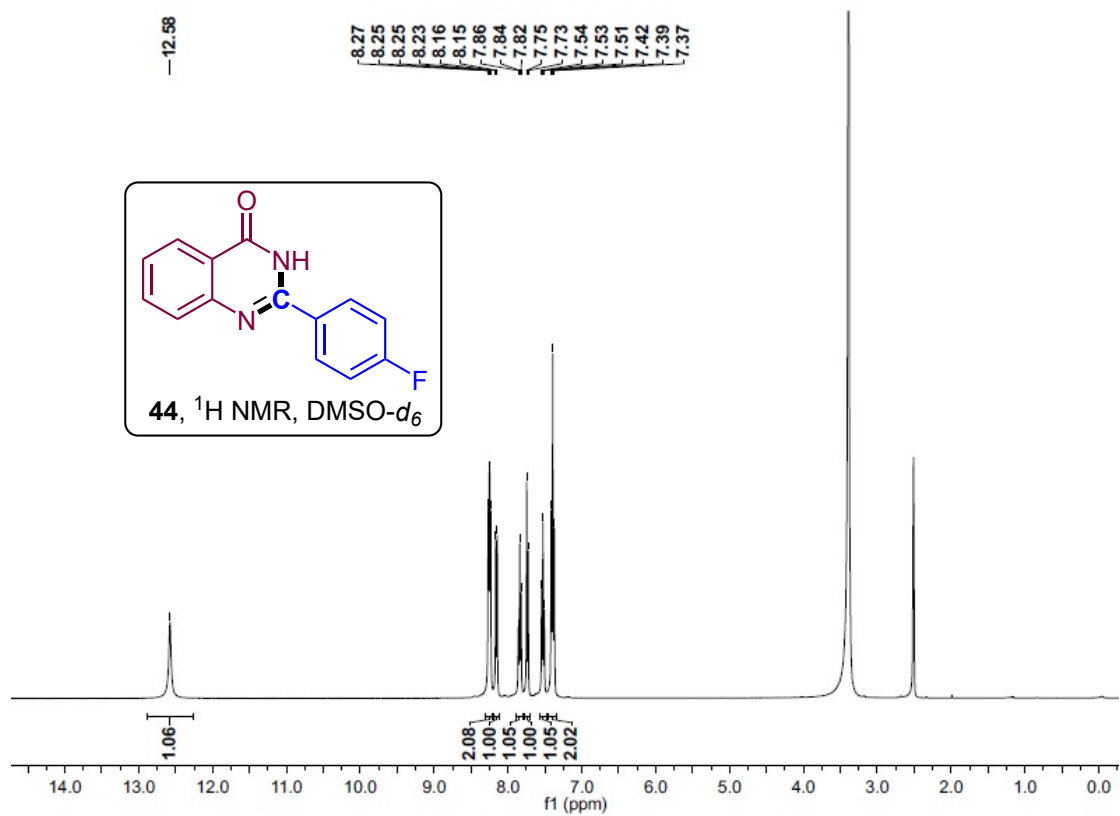

### <sup>13</sup>C NMR

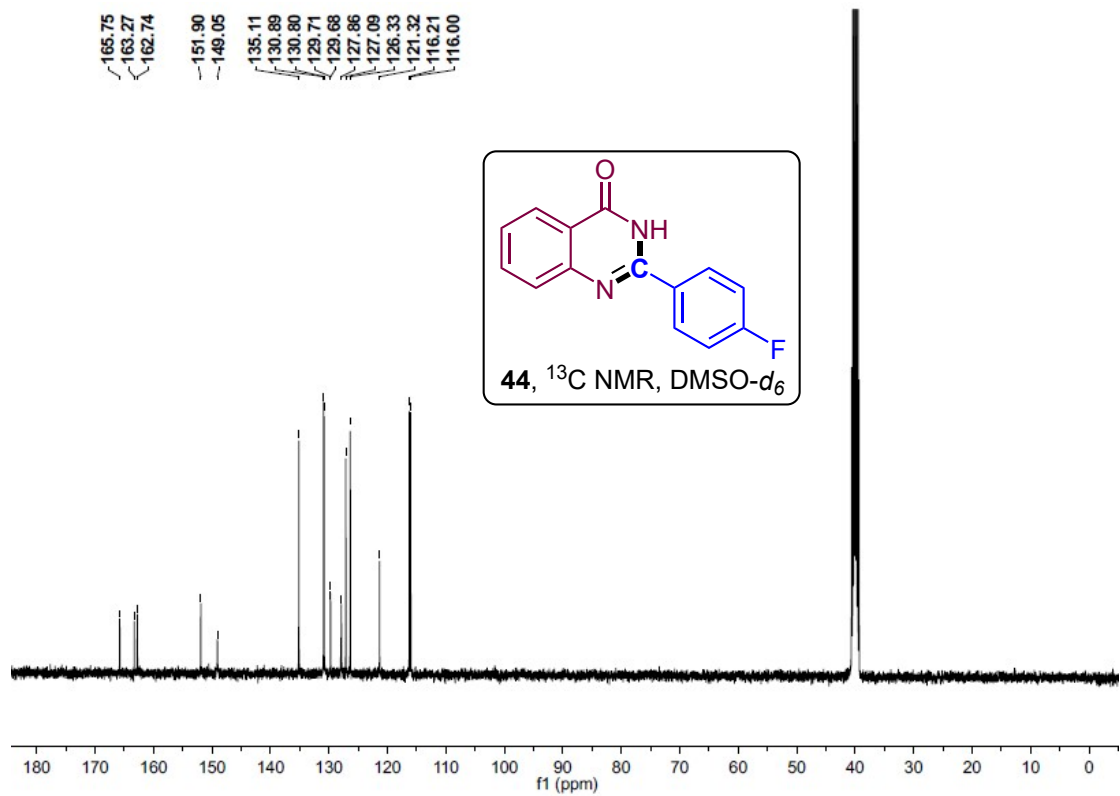

2-(4-Chlorophenyl)quinazolin-4(3*H*)-one (45)

### <sup>1</sup>H NMR

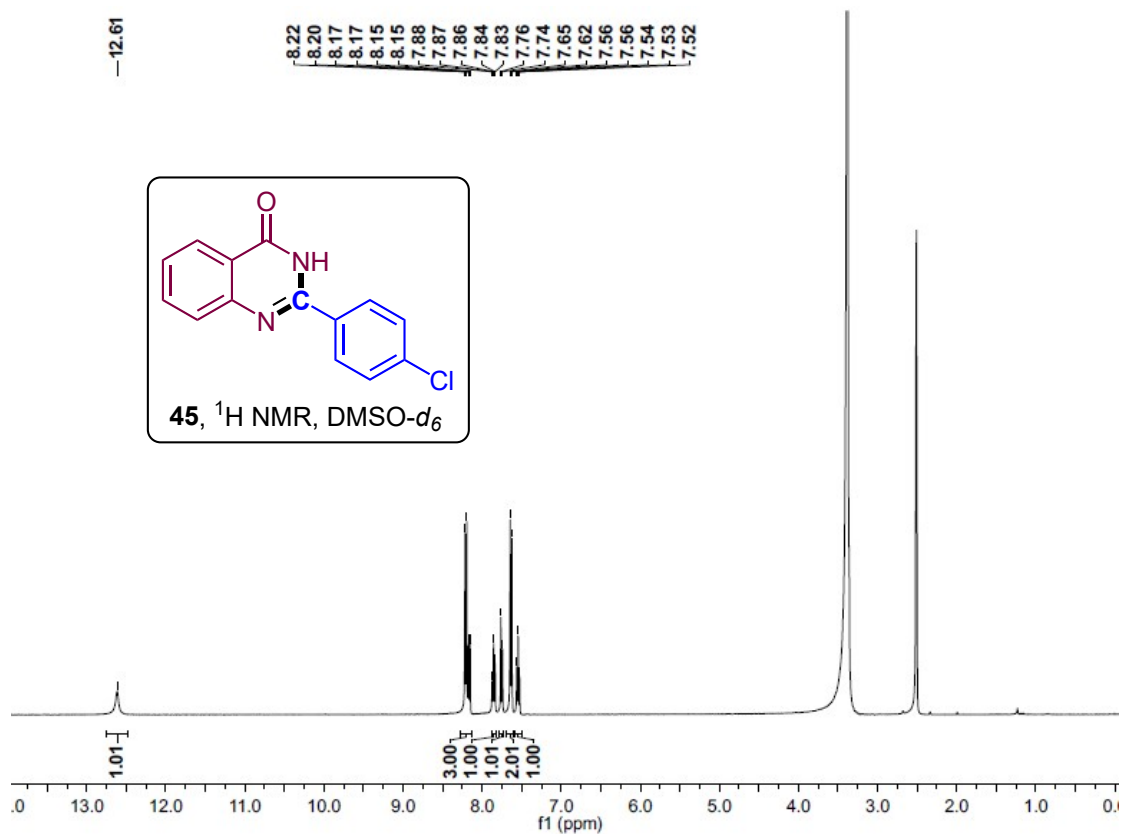

### <sup>13</sup>C NMR

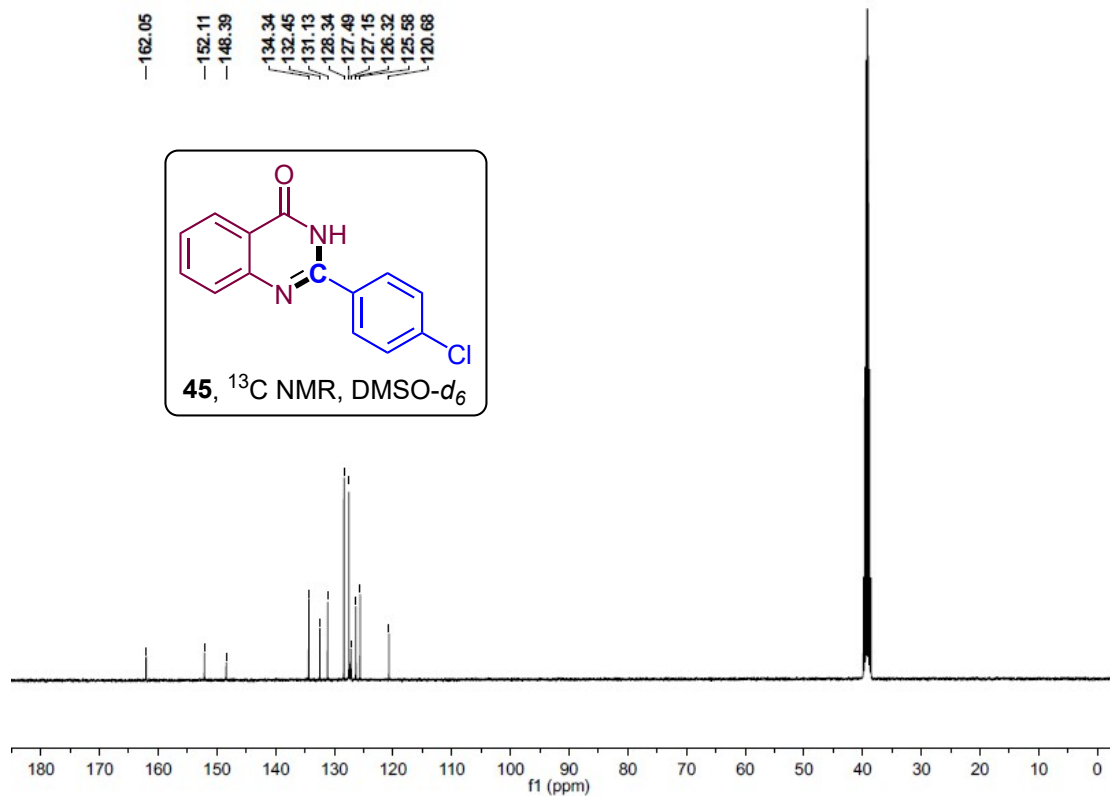

2-(Naphthalen-2-yl)quinazolin-4(3*H*)-one (46)



### <sup>1</sup>H NMR

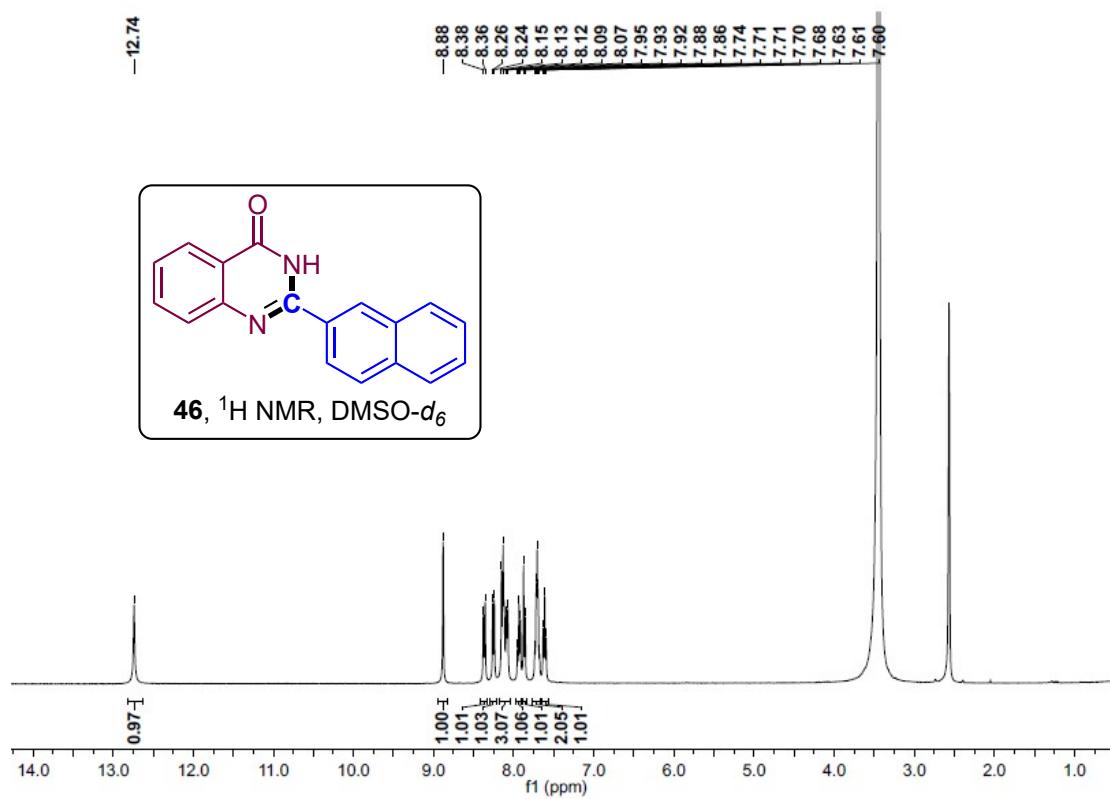

### <sup>13</sup>C NMR

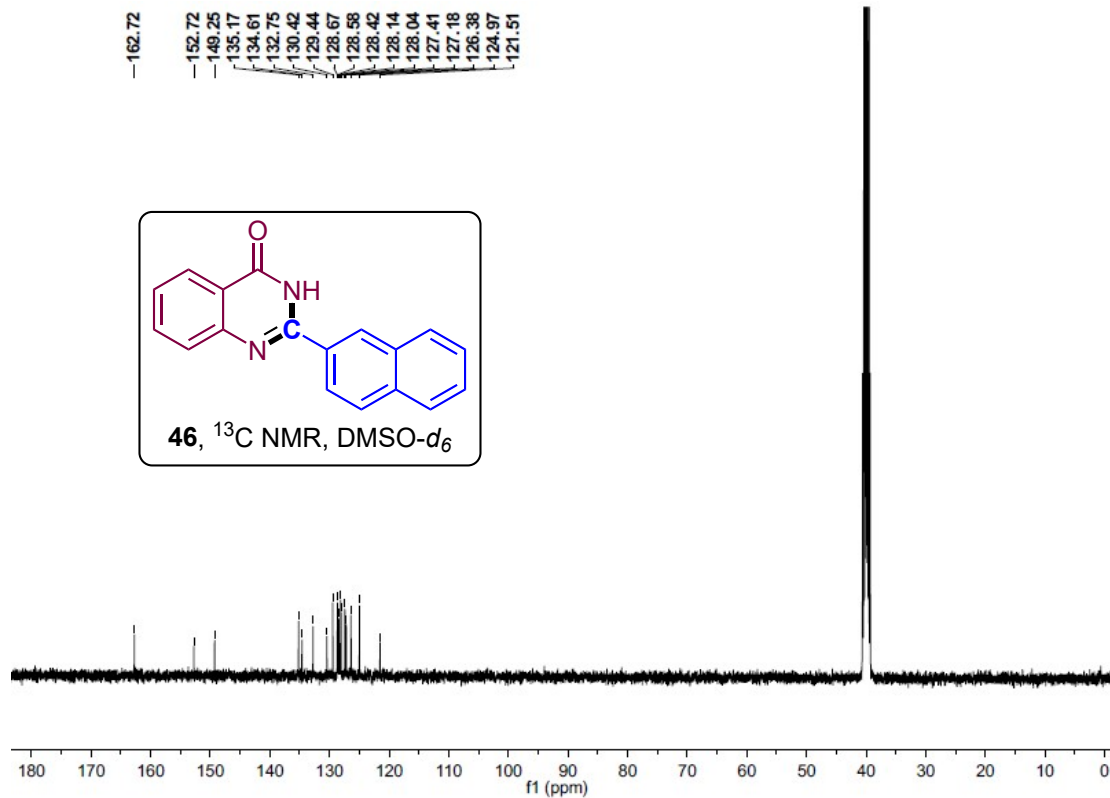

*N*-(2-Benzoylphenyl)benzamide (**48**)

## <sup>1</sup>H NMR

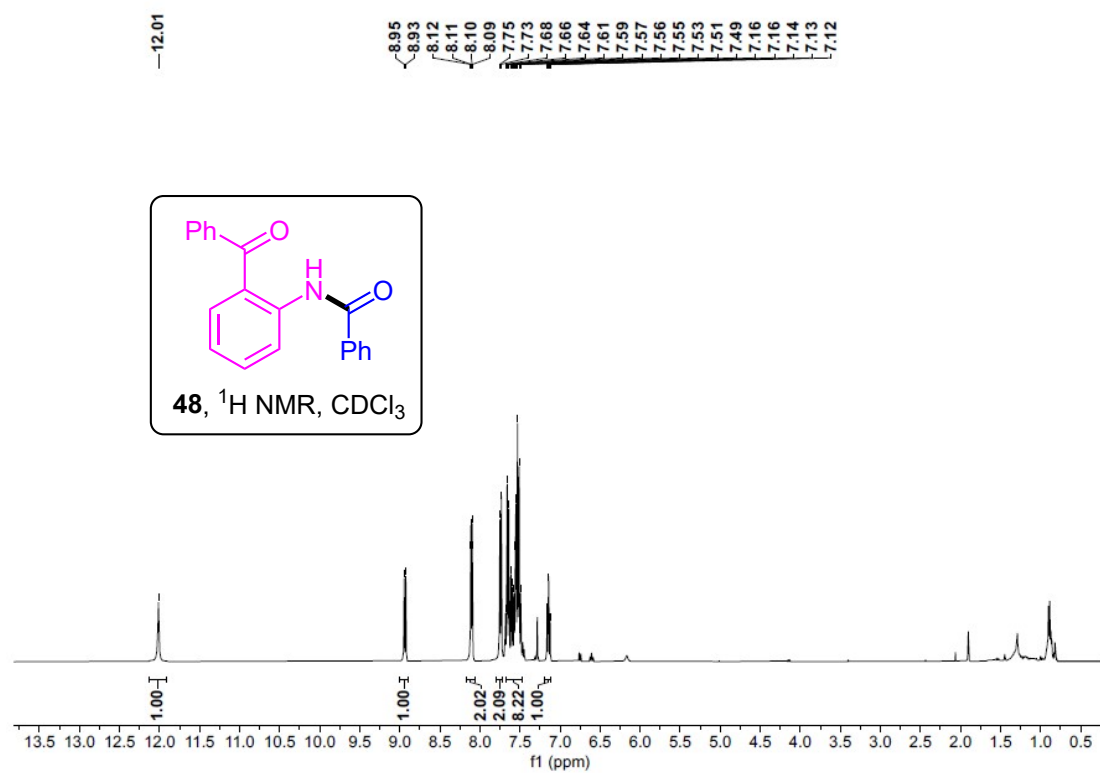

## <sup>13</sup>C NMR

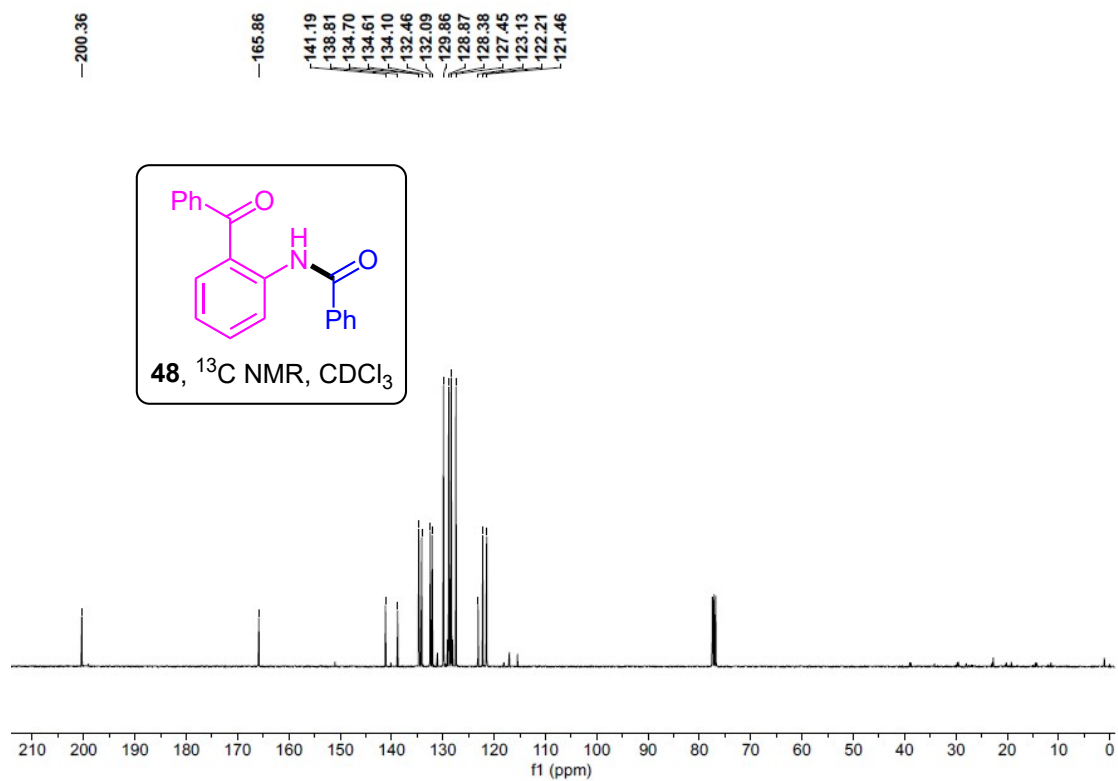

## References

- [1] Y. Yan, Y. Zhang, C. Feng, Z. Zha and Z. Wang, *Angew. Chem. Int. Ed.*, 2012, **51**, 8077.
- [2] D. Zhao, Q. Shen and J.-X. Lia, *Adv. Synth. Catal.*, 2015, **357**, 339.
- [3] J. Zhang, D. Zhu, C. Yu, C. Wan and Z. Wang, *Org. Lett.*, **2010**, *12*, 2841.
- [4] A. Philips, D. Raja, A. Arumugam, W.-Y. Lin and G. C. Senadi, *Asian J. Org. Chem.*, 2021, **10**, 1795.
- [5] J. Godeau, M. Harari, S. Laclef, E. Deau, C. Fruit and T. Besson, *Eur. J. Org. Chem.*, 2015, **2015**, 7705.
- [6] D. Zhao, T. Wang, and J.-X. Li, *Chem. Commun.*, 2014, **50**, 6471.
